# Supplementary material
Source: publisher figshare collection journal article supplement (https://gsajournals.figshare.com/articles/dataset/_/12783044)
Supplement: Supplementary file 1 [file 1]

## Sheet: ScreenedKinases
WormBase Gene ID	Public Name	Sequence Name	Human Ortholog	Automated Description
WBGene00017672	F21F3.2	F21F3.2	HGNC:MAPK8|ParaSite-Compara, HGNC:SRPK2|ParaSite-Compara, HGNC:ICK|ParaSite-Compara, HGNC:MAPK4|ParaSite-Compara, HGNC:MAPK13|ParaSite-Compara, HGNC:NLK|ParaSite-Compara, HGNC:MAPK9|ParaSite-Compara, HGNC:MAPK12|ParaSite-Compara, HGNC:MAPK14|ParaSite-Compara, HGNC:MAPK10|ParaSite-Compara, HGNC:SRPK3|ParaSite-Compara, HGNC:MAPK6|ParaSite-Compara	Is predicted to have MAP kinase activity. Human ortholog(s) of this gene are implicated in endocrine-cerebro-osteodysplasia syndrome and juvenile myoclonic epilepsy 10.
WBGene00022519	ZC123.4	ZC123.4	HGNC:CDK14|PhylomeDB;Hieranoid;Panther;TreeFam;OMA;EnsEMBL-Compara;OrthoFinder;ParaSite-Compara, HGNC:CDK15|Hieranoid;TreeFam;Panther;PhylomeDB;EnsEMBL-Compara;OrthoFinder;ParaSite-Compara, HGNC:CDK4|ParaSite-Compara, HGNC:CDK6|ParaSite-Compara, HGNC:CDKL3|ParaSite-Compara, HGNC:CDKL2|ParaSite-Compara	Is an ortholog of human CDK14 (cyclin dependent kinase 14). Is predicted to have cyclin binding activity and cyclin-dependent protein serine\/threonine kinase activity. Human ortholog(s) of this gene are implicated in primary autosomal recessive microcephaly 12.
WBGene00003400	dapk-1	K12C11.4	HGNC:DAPK1|EnsEMBL-Compara;OrthoInspector;PhylomeDB;Hieranoid;Panther;Roundup;TreeFam;OrthoFinder;Inparanoid;OMA, HGNC:DAPK3|Roundup;TreeFam;Panther;OrthoFinder;EnsEMBL-Compara;ParaSite-Compara, HGNC:DAPK2|EnsEMBL-Compara;Panther;Roundup;TreeFam;OrthoFinder, ENSG00000286143|ParaSite-Compara, HGNC:NEXN|ParaSite-Compara	Is an ortholog of human DAPK1 (death associated protein kinase 1). Is predicted to have ATP binding activity and protein serine\/threonine kinase activity. Human ortholog(s) of this gene are implicated in dilated cardiomyopathy 1CC and hypertrophic cardiomyopathy 20.
WBGene00001542	gcy-17	W03F11.2	N.A.	Is predicted to have guanylate cyclase activity and peptide receptor activity. Is expressed in PHAL\; PHAR\; and head.
WBGene00017736	F23C8.7	F23C8.7	HGNC:FER|Panther;EnsEMBL-Compara;OrthoFinder;PhylomeDB, HGNC:FES|Panther;EnsEMBL-Compara;OrthoFinder;PhylomeDB	Is an ortholog of human FER (FER tyrosine kinase) and FES (FES proto-oncogene, tyrosine kinase). Is predicted to have non-membrane spanning protein tyrosine kinase activity and signaling receptor binding activity.
WBGene00017737	F23C8.8	F23C8.8	HGNC:TSSK4|TreeFam;EnsEMBL-Compara;ParaSite-Compara	Is an ortholog of human TSSK4 (testis specific serine kinase 4). Is predicted to have protein serine\/threonine kinase activity.
WBGene00019698	riok-1	M01B12.5	HGNC:RIOK1|OrthoInspector;EnsEMBL-Compara;PhylomeDB;Hieranoid;Panther;Roundup;OrthoFinder;Inparanoid;OMA;ParaSite-Compara	Is an ortholog of human RIOK1 (RIO kinase 1). Is predicted to have protein serine\/threonine kinase activity. Is involved in several processes, including gamete generation\; positive regulation of vulval development\; and regulation of intracellular signal transduction. Is expressed in gonad\; nervous system\; and vulva.
WBGene00019362	cdk-2	K03E5.3	HGNC:CDK3|TreeFam;Panther;OrthoFinder, HGNC:CDK5|ParaSite-Compara	Is an ortholog of human CDK3 (cyclin dependent kinase 3). Is predicted to have cyclin-dependent protein serine\/threonine kinase activity. Is involved in several processes, including germline cell cycle switching, mitotic to meiotic cell cycle\; hermaphrodite genitalia morphogenesis\; and regulation of cellular protein localization. Localizes to chromatin.
WBGene00006820	unc-89	C09D1.1	HGNC:SPEG|Hieranoid;TreeFam;PhylomeDB;EnsEMBL-Compara;ParaSite-Compara, HGNC:MYOT|ParaSite-Compara, HGNC:ALPK3|ParaSite-Compara, HGNC:IGFN1|ParaSite-Compara, HGNC:OBSCN|ParaSite-Compara	Is an ortholog of human SPEG (striated muscle enriched protein kinase). Exhibits MATH domain binding activity\; Rho guanyl-nucleotide exchange factor activity\; and phosphatase binding activity. Is involved in several processes, including myofibril assembly\; pharyngeal gland morphogenesis\; and regulation of striated muscle contraction. Localizes to M band. Is expressed in alimentary muscle\; go…
WBGene00020131	gcy-28	T01A4.1	HGNC:NPR1|OrthoInspector;EnsEMBL-Compara;PhylomeDB;Panther;Roundup;TreeFam;OrthoFinder;Inparanoid;OMA;Hieranoid;ParaSite-Compara, HGNC:NPR2|OrthoInspector;EnsEMBL-Compara;PhylomeDB;Panther;Roundup;TreeFam;Inparanoid;OrthoFinder;OMA;Hieranoid	Is an ortholog of human NPR1 (natriuretic peptide receptor 1). Exhibits guanylate cyclase activity. Is involved in several processes, including olfactory behavior\; sensory perception of chemical stimulus\; and sensory processing. Localizes to cell body and neuron projection. Is expressed in body wall musculature\; gonad\; hypodermis\; intestine\; and neurons.
WBGene00004962	spe-8	F53G12.6	HGNC:FER|TreeFam;Panther;PhylomeDB;OrthoFinder, HGNC:FES|TreeFam;Panther;PhylomeDB;OrthoFinder	Is an ortholog of human FER (FER tyrosine kinase) and FES (FES proto-oncogene, tyrosine kinase). Is predicted to have non-membrane spanning protein tyrosine kinase activity and signaling receptor binding activity. Is involved in spermatid development. Localizes to plasma membrane. Is expressed in sperm and spermatocyte.
WBGene00021016	W03G9.5	W03G9.5	N.A.	Is predicted to have protein serine\/threonine kinase activity.
WBGene00001859	hil-8	T05E8.2	N.A.	Is predicted to have DNA binding activity.
WBGene00015634	C09D4.3	C09D4.3	N.A.	Is predicted to have protein serine\/threonine kinase activity.
WBGene00019081	F59A3.8	F59A3.8	HGNC:FER|Hieranoid;Panther;PhylomeDB;EnsEMBL-Compara;OrthoFinder, HGNC:FES|Hieranoid;Panther;PhylomeDB;EnsEMBL-Compara;OrthoFinder	Is an ortholog of human FER (FER tyrosine kinase) and FES (FES proto-oncogene, tyrosine kinase). Is predicted to have non-membrane spanning protein tyrosine kinase activity and signaling receptor binding activity.
WBGene00003472	mtk-1	B0414.7	HGNC:MAP3K4|Hieranoid;Roundup;Inparanoid;PhylomeDB;OrthoInspector;EnsEMBL-Compara;ParaSite-Compara	Is an ortholog of human MAP3K4 (mitogen-activated protein kinase kinase kinase 4). Is predicted to have protein serine\/threonine kinase activity.
WBGene00016421	cdc-7	C34G6.5	HGNC:CDC7|Hieranoid;TreeFam;Panther;PhylomeDB;EnsEMBL-Compara;ParaSite-Compara	Is an ortholog of human CDC7 (cell division cycle 7). Is predicted to have protein serine\/threonine kinase activity.
WBGene00015030	B0207.7	B0207.7	N.A.	Is predicted to have protein serine\/threonine kinase activity. Is expressed in AIYL and AIYR.
WBGene00020381	T09B4.7	T09B4.7	N.A.	Is predicted to have protein serine\/threonine kinase activity.
WBGene00018158	comp-1	F37E3.3	N.A.	Is predicted to have kinase activity.
WBGene00016946	C55B7.10	C55B7.10	N.A.	Is predicted to have protein serine\/threonine kinase activity.
WBGene00022631	nekl-2	ZC581.1	ENSG00000160602|OrthoInspector;EnsEMBL-Compara;PhylomeDB;Roundup;TreeFam;OrthoFinder, HGNC:NEK3|ParaSite-Compara	Is an ortholog of human NEK8 (NIMA related kinase 8). Is predicted to have ATP binding activity\; metal ion binding activity\; and protein serine\/threonine kinase activity. Is involved in molting cycle and positive regulation of endocytosis. Is expressed in hyp7 syncytium.
WBGene00022632	ZC581.2	ZC581.2	N.A.	Is predicted to have protein serine\/threonine kinase activity.
WBGene00022634	ZC581.7	ZC581.7	HGNC:FER|Panther;OrthoFinder;PhylomeDB, HGNC:FES|Panther;OrthoFinder;PhylomeDB	Is an ortholog of human FER (FER tyrosine kinase) and FES (FES proto-oncogene, tyrosine kinase). Is predicted to have non-membrane spanning protein tyrosine kinase activity and signaling receptor binding activity.
WBGene00022635	ZC581.9	ZC581.9	HGNC:SCYL2|EnsEMBL-Compara;OrthoInspector;Hieranoid;Panther;Roundup;TreeFam;OrthoFinder;ParaSite-Compara	Is an ortholog of human SCYL2 (SCY1 like pseudokinase 2). Is predicted to have ATP binding activity and protein kinase activity.
WBGene00017098	mek-5	E02D9.1	HGNC:KHDRBS2|Panther;Roundup;EnsEMBL-Compara, HGNC:QKI|ParaSite-Compara	Is an ortholog of human KHDRBS2 (KH RNA binding domain containing, signal transduction associated 2). Is predicted to have RNA binding activity. Is expressed in head and tail.
WBGene00020659	T21G5.1	T21G5.1	HGNC:FER|Panther;OrthoFinder;PhylomeDB, HGNC:FES|Panther;OrthoFinder;PhylomeDB	Is an ortholog of human FER (FER tyrosine kinase) and FES (FES proto-oncogene, tyrosine kinase). Is predicted to have non-membrane spanning protein tyrosine kinase activity and signaling receptor binding activity.
WBGene00002198	kin-14	F22D6.1	HGNC:FER|EnsEMBL-Compara;OrthoInspector;PhylomeDB;Panther;OrthoFinder, HGNC:FES|OrthoInspector;EnsEMBL-Compara;PhylomeDB;Panther;OrthoFinder	Is an ortholog of human FER (FER tyrosine kinase) and FES (FES proto-oncogene, tyrosine kinase). Is predicted to have non-membrane spanning protein tyrosine kinase activity and signaling receptor binding activity. Is expressed in head neurons\; marginal cell\; pharyngeal muscle cell\; pharyngeal-intestinal valve\; and tail neurons.
WBGene00007258	hasp-1	C01H6.9	HGNC:HASPIN|Panther;EnsEMBL-Compara;OrthoInspector;PhylomeDB;OrthoFinder, HGNC:IRAK2|ParaSite-Compara, HGNC:IRAK3|ParaSite-Compara, HGNC:IRAK1|ParaSite-Compara	Is an ortholog of human HASPIN (histone H3 associated protein kinase). Exhibits G-protein alpha-subunit binding activity. Is expressed in PHB\; PVT\; head neurons\; intestine\; and seam cell.
WBGene00000275	bub-1	R06C7.8	HGNC:BUB1B|Panther;EnsEMBL-Compara;Roundup, HGNC:BUB1|EnsEMBL-Compara;PhylomeDB;Panther;Roundup;TreeFam;OrthoInspector;ParaSite-Compara	Is an ortholog of human BUB1 (BUB1 mitotic checkpoint serine\/threonine kinase). Exhibits kinetochore binding activity. Is involved in several processes, including meiotic nuclear division\; positive regulation of nematode male tail tip morphogenesis\; and positive regulation of protein localization to kinetochore. Localizes to kinetochore. Colocalizes with chromosome. Is expressed in seam cell.
WBGene00008311	rskn-2	C54G4.1	HGNC:RPS6KA5|EnsEMBL-Compara;OrthoInspector;PhylomeDB;Hieranoid;Roundup;TreeFam;Inparanoid;OrthoFinder;OMA, HGNC:RPS6KA4|EnsEMBL-Compara;OrthoInspector;PhylomeDB;Hieranoid;Roundup;TreeFam;OrthoFinder;Inparanoid;OMA, HGNC:RPS6KA1|ParaSite-Compara, HGNC:RPS6KA6|ParaSite-Compara, HGNC:RPS6KB2|ParaSite-Compara	Is an ortholog of human RPS6KA4 (ribosomal protein S6 kinase A4) and RPS6KA5 (ribosomal protein S6 kinase A5). Is predicted to have ATP binding activity\; magnesium ion binding activity\; and protein serine\/threonine kinase activity.
WBGene00009921	F52B5.2	F52B5.2	HGNC:MOK|ParaSite-Compara	Is predicted to have protein serine\/threonine kinase activity.
WBGene00011352	rskn-1	T01H8.1	HGNC:RPS6KA6|OrthoInspector;EnsEMBL-Compara;PhylomeDB;Hieranoid;Panther;Inparanoid;OrthoFinder;OMA;ParaSite-Compara, HGNC:RPS6KA2|EnsEMBL-Compara;OrthoInspector;PhylomeDB;Hieranoid;Panther;Roundup;OrthoFinder;Inparanoid;OMA, HGNC:RPS6KA1|OrthoInspector;EnsEMBL-Compara;PhylomeDB;Hieranoid;Panther;Roundup;Inparanoid;OrthoFinder;OMA;ParaSite-Compara, HGNC:RPS6KA3|OrthoInspector;EnsEMBL-Compara;Phylo…	Is an ortholog of human RPS6KA1 (ribosomal protein S6 kinase A1). Is predicted to have ribosomal protein S6 kinase activity.
WBGene00000409	cdk-8	F39H11.3	HGNC:CDK8|OrthoInspector;EnsEMBL-Compara;PhylomeDB;Hieranoid;Panther;Roundup;TreeFam;OrthoFinder;Inparanoid;OMA, HGNC:CDK19|EnsEMBL-Compara;OrthoInspector;PhylomeDB;Hieranoid;Panther;Roundup;TreeFam;OrthoFinder;Inparanoid;OMA, HGNC:CDK4|ParaSite-Compara, HGNC:CDK6|ParaSite-Compara, HGNC:CDK15|ParaSite-Compara, HGNC:CDKL2|ParaSite-Compara, HGNC:CDK14|ParaSite-Compara, HGNC:CDKL3|ParaSite-Compara	Is an ortholog of human CDK19 (cyclin dependent kinase 19) and CDK8 (cyclin dependent kinase 8). Is predicted to have RNA polymerase II CTD heptapeptide repeat kinase activity and cyclin-dependent protein serine\/threonine kinase activity. Is expressed in anchor cell and neurons. Human ortholog(s) of this gene are implicated in primary autosomal recessive microcephaly 12.
WBGene00007977	gska-3	C36B1.10	HGNC:ICK|ParaSite-Compara, HGNC:MAPK4|ParaSite-Compara, HGNC:MAPK13|ParaSite-Compara, HGNC:NLK|ParaSite-Compara, HGNC:MAPK9|ParaSite-Compara, HGNC:MAPK12|ParaSite-Compara, HGNC:MAPK6|ParaSite-Compara, HGNC:SRPK2|ParaSite-Compara	Is predicted to have MAP kinase activity. Human ortholog(s) of this gene are implicated in endocrine-cerebro-osteodysplasia syndrome and juvenile myoclonic epilepsy 10.
WBGene00001121	dyf-5	M04C9.5	HGNC:MAK|EnsEMBL-Compara;OrthoInspector;PhylomeDB;Panther;Roundup;TreeFam;OrthoFinder;Inparanoid;ParaSite-Compara, HGNC:ICK|EnsEMBL-Compara;OrthoInspector;PhylomeDB;Panther;Roundup;TreeFam;Inparanoid;OrthoFinder	Is an ortholog of human MAK (male germ cell associated kinase). Is predicted to have ATP binding activity and MAP kinase activity. Is involved in cilium organization and regulation of non-motile cilium assembly. Localizes to several cellular components, including dendrite\; neuronal cell body\; and non-motile cilium. Is expressed in lateral ganglion and neurons. Human ortholog(s) of this gene are…
WBGene00009160	F26E4.5	F26E4.5	HGNC:FER|TreeFam;Panther;PhylomeDB;OrthoFinder, HGNC:FES|TreeFam;Panther;PhylomeDB;OrthoFinder	Is an ortholog of human FER (FER tyrosine kinase) and FES (FES proto-oncogene, tyrosine kinase). Is predicted to have non-membrane spanning protein tyrosine kinase activity and signaling receptor binding activity.
WBGene00003396	mom-4	F52F12.3	HGNC:MAP3K7|OrthoInspector;PhylomeDB;Roundup;Inparanoid;OrthoFinder, HGNC:BRAF|ParaSite-Compara, HGNC:MAP3K21|ParaSite-Compara, HGNC:LIMK1|ParaSite-Compara, HGNC:LIMK2|ParaSite-Compara, HGNC:RIPK3|ParaSite-Compara, HGNC:RIPK1|ParaSite-Compara, HGNC:RIPK2|ParaSite-Compara, HGNC:MAP3K9|ParaSite-Compara, HGNC:MLKL|ParaSite-Compara, HGNC:MAP3K11|ParaSite-Compara, HGNC:MAP3K10|ParaSite-Compara, HGNC:A…	Is an ortholog of human MAP3K7 (mitogen-activated protein kinase kinase kinase 7). Exhibits MAP kinase kinase kinase activity. Is involved in several processes, including asymmetric protein localization involved in cell fate determination\; cell fate specification\; and cellular protein modification process. Localizes to striated muscle dense body. Is expressed in BAGL and BAGR. Human ortholog(s)…
WBGene00013694	mekk-3	Y106G6A.1	HGNC:NEK3|ParaSite-Compara, HGNC:NEK10|ParaSite-Compara	Is predicted to have ATP binding activity and protein kinase activity. Localizes to sarcoplasmic reticulum.
WBGene00013701	Y106G6D.4	Y106G6D.4	HGNC:SRPK2|ParaSite-Compara, HGNC:MAPK13|ParaSite-Compara, HGNC:MAPK6|ParaSite-Compara, HGNC:ICK|ParaSite-Compara, HGNC:MAPK4|ParaSite-Compara, HGNC:NLK|ParaSite-Compara, HGNC:MAPK12|ParaSite-Compara	Is predicted to have MAP kinase activity. Human ortholog(s) of this gene are implicated in endocrine-cerebro-osteodysplasia syndrome and juvenile myoclonic epilepsy 10.
WBGene00013705	Y106G6E.1	Y106G6E.1	HGNC:SRPK2|ParaSite-Compara, HGNC:MAPK13|ParaSite-Compara, HGNC:ICK|ParaSite-Compara, HGNC:MAPK4|ParaSite-Compara, HGNC:NLK|ParaSite-Compara, HGNC:MAPK9|ParaSite-Compara, HGNC:MAPK12|ParaSite-Compara, HGNC:MAPK6|ParaSite-Compara	Is predicted to have MAP kinase activity. Human ortholog(s) of this gene are implicated in endocrine-cerebro-osteodysplasia syndrome and juvenile myoclonic epilepsy 10.
WBGene00013709	csnk-1	Y106G6E.6	HGNC:CSNK1G2|EnsEMBL-Compara;OrthoInspector;PhylomeDB;Hieranoid;Roundup;OrthoFinder;Inparanoid;OMA;Panther, HGNC:CSNK1G1|EnsEMBL-Compara;OrthoInspector;PhylomeDB;Hieranoid;Panther;Roundup;OrthoFinder;Inparanoid;OMA, HGNC:CSNK1G3|OrthoInspector;EnsEMBL-Compara;PhylomeDB;Hieranoid;Panther;Roundup;OrthoFinder;Inparanoid;OMA;ParaSite-Compara	Is an ortholog of human CSNK1G3 (casein kinase 1 gamma 3). Is predicted to have protein serine\/threonine kinase activity. Is involved in several processes, including first cell cycle pseudocleavage\; negative regulation of 1-phosphatidylinositol-4-phosphate 5-kinase activity\; and regulation of mitotic spindle elongation. Localizes to aster\; cell cortex\; and plasma membrane.
WBGene00007047	wts-1	T20F10.1	HGNC:LATS1|OrthoInspector;EnsEMBL-Compara;PhylomeDB;Hieranoid;Panther;TreeFam;OrthoFinder, HGNC:LATS2|EnsEMBL-Compara;PhylomeDB;Hieranoid;Panther;TreeFam;OrthoFinder, HGNC:MAST1|ParaSite-Compara, HGNC:MAST2|ParaSite-Compara, HGNC:MAST4|ParaSite-Compara, HGNC:STK32B|ParaSite-Compara, HGNC:SGK1|ParaSite-Compara, HGNC:MAST3|ParaSite-Compara, HGNC:STK32C|ParaSite-Compara	Is an ortholog of human LATS1 (large tumor suppressor kinase 1). Exhibits RNA polymerase II transcription coactivator binding activity and protein kinase activity. Is involved in several processes, including apical protein localization\; digestive tract development\; and negative regulation of protein import into nucleus. Localizes to apical plasma membrane and cytoplasm. Is expressed in several …
WBGene00015230	tag-344	B0511.4	HGNC:TSSK3|OMA;OrthoInspector;EnsEMBL-Compara;Inparanoid, HGNC:TSSK2|OrthoInspector;EnsEMBL-Compara;Panther;Roundup;OrthoFinder;Inparanoid;OMA;ParaSite-Compara, HGNC:TSSK6|OrthoInspector;EnsEMBL-Compara;Panther;Roundup;TreeFam;Inparanoid;OrthoFinder;ParaSite-Compara, HGNC:TSSK1B|EnsEMBL-Compara;OrthoInspector;Panther;Roundup;Inparanoid;ParaSite-Compara, HGNC:BRSK2|ParaSite-Compara, HGNC:NUAK1|Par…	Is an ortholog of human TSSK2 (testis specific serine kinase 2) and Tssk6. Is predicted to have protein serine\/threonine kinase activity.
WBGene00016388	C34B2.3	C34B2.3	N.A.	Is predicted to have protein serine\/threonine kinase activity.
WBGene00016462	C35E7.10	C35E7.10	HGNC:FER|Panther;EnsEMBL-Compara;OrthoFinder;PhylomeDB, HGNC:FES|EnsEMBL-Compara;Panther;OrthoFinder;PhylomeDB	Is an ortholog of human FER (FER tyrosine kinase) and FES (FES proto-oncogene, tyrosine kinase). Is predicted to have non-membrane spanning protein tyrosine kinase activity and signaling receptor binding activity.
WBGene00002205	kin-23	W04G5.6	HGNC:KIT|Panther;OrthoInspector;EnsEMBL-Compara;ParaSite-Compara, HGNC:PDGFRA|EnsEMBL-Compara;OrthoInspector;Panther;ParaSite-Compara, HGNC:PDGFRB|EnsEMBL-Compara;OrthoInspector;Panther;ParaSite-Compara, HGNC:CSF1R|EnsEMBL-Compara;OrthoInspector;Panther;ParaSite-Compara, HGNC:FLT3|Panther;EnsEMBL-Compara;OrthoInspector;ParaSite-Compara, HGNC:FLT4|ParaSite-Compara, HGNC:EPHA10|ParaSite-Compara, HG…	Is an ortholog of several human genes including KIT (KIT proto-oncogene, receptor tyrosine kinase)\; PDGFRA (platelet derived growth factor receptor alpha)\; and PDGFRB (platelet derived growth factor receptor beta). Is predicted to have transmembrane receptor protein tyrosine kinase activity. Human ortholog(s) of this gene are implicated in several diseases, including bone development disease (m…
WBGene00001008	dlk-1	F33E2.2	HGNC:MAP3K13|EnsEMBL-Compara;OrthoInspector;PhylomeDB;Hieranoid;Roundup;TreeFam;Inparanoid;OrthoFinder, HGNC:MAP3K12|EnsEMBL-Compara;OrthoInspector;PhylomeDB;Hieranoid;Roundup;TreeFam;OrthoFinder;Inparanoid;ParaSite-Compara	Is an ortholog of human MAP3K12 (mitogen-activated protein kinase kinase kinase 12). Exhibits protein C-terminus binding activity and ubiquitin protein ligase binding activity. Is involved in several processes, including generation of neurons\; p38MAPK cascade\; and positive regulation of MAP kinase activity. Localizes to neuronal cell body and synapse. Is expressed in PLML and PLMR.
WBGene00001746	gsk-3	Y18D10A.5	HGNC:GSK3A|OrthoInspector;EnsEMBL-Compara;PhylomeDB;Hieranoid;Panther;Roundup;Inparanoid;OMA;ParaSite-Compara, HGNC:GSK3B|EnsEMBL-Compara;OrthoInspector;PhylomeDB;Hieranoid;Panther;Roundup;Inparanoid;OrthoFinder;OMA;ParaSite-Compara, ENSG00000268643|ParaSite-Compara	Is an ortholog of human GSK3B (glycogen synthase kinase 3 beta). Exhibits protein serine\/threonine kinase activity. Is involved in several processes, including Wnt signaling pathway, regulating spindle positioning\; engulfment of apoptotic cell\; and left\/right axis specification.
WBGene00006382	taf-1	W04A8.7	HGNC:TAF1L|EnsEMBL-Compara;OrthoInspector;PhylomeDB;Hieranoid;Panther;Roundup;TreeFam;Inparanoid;OMA;OrthoFinder;ParaSite-Compara, HGNC:TAF1|OrthoInspector;EnsEMBL-Compara;PhylomeDB;Hieranoid;Panther;Roundup;TreeFam;Inparanoid;OMA;OrthoFinder;ParaSite-Compara	Is an ortholog of human TAF1 (TATA-box binding protein associated factor 1) and TAF1L (TATA-box binding protein associated factor 1 like). Is predicted to contribute to transcription regulatory region DNA binding activity. Is involved in embryo development and positive regulation of transcription by RNA polymerase II. Localizes to nucleus. Human ortholog(s) of this gene are implicated in X-linked…
WBGene00005078	src-2	F49B2.5	HGNC:PTK6|Panther;EnsEMBL-Compara;OrthoFinder, HGNC:FRK|OrthoInspector;EnsEMBL-Compara;PhylomeDB;Hieranoid;Panther;Roundup;TreeFam;Inparanoid;OrthoFinder, HGNC:SRMS|EnsEMBL-Compara;Panther;OrthoFinder	Is an ortholog of human FRK (fyn related Src family tyrosine kinase). Is predicted to have non-membrane spanning protein tyrosine kinase activity and signaling receptor binding activity. Is involved in pharynx development. Is expressed in anus\; pharyngeal muscle cell\; and vulva.
WBGene00001546	gcy-21	F22E5.3	N.A.	Is predicted to have guanylate cyclase activity and peptide receptor activity. Is expressed in ADLL\; ADLR\; ASGL\; and ASGR.
WBGene00001541	gcy-15	ZC239.7	N.A.	Is predicted to have guanylate cyclase activity and peptide receptor activity. Is expressed in ASGL and ASGR.
WBGene00001544	gcy-19	C17F4.6	N.A.	Is predicted to have ATP binding activity\; guanylate cyclase activity\; and protein kinase activity. Is expressed in inner labial neurons and nervous system.
WBGene00018745	F53C3.1	F53C3.1	N.A.	Is predicted to have protein serine\/threonine kinase activity.
WBGene00015816	C16A11.3	C16A11.3	N.A.	Is predicted to have metal ion binding activity.
WBGene00006868	vab-1	M03A1.1	HGNC:EPHA1|OrthoInspector;EnsEMBL-Compara;PhylomeDB;Hieranoid;Panther;TreeFam;Inparanoid;OrthoFinder;OMA;ParaSite-Compara, HGNC:EPHA8|OrthoInspector;PhylomeDB;Hieranoid;Panther;Inparanoid;OrthoFinder;OMA;EnsEMBL-Compara;ParaSite-Compara, HGNC:EPHA10|EnsEMBL-Compara;OrthoInspector;PhylomeDB;Hieranoid;Panther;Inparanoid;OrthoFinder;ParaSite-Compara, HGNC:EPHB2|OrthoInspector;PhylomeDB;Hieranoid;Pan…	Is an ortholog of human EPHA1 (EPH receptor A1) and EPHB2 (EPH receptor B2). Exhibits ephrin receptor activity and protein domain specific binding activity. Is involved in several processes, including embryonic morphogenesis\; generation of neurons\; and oocyte maturation. Localizes to axon and plasma membrane. Is expressed in several structures, including hypodermal cell\; neuroblasts\; neurons\…
WBGene00020223	T05A7.6	T05A7.6	N.A.	Is predicted to have protein serine\/threonine kinase activity.
WBGene00016352	tbck-1	C33F10.2	HGNC:TBCK|OrthoInspector;EnsEMBL-Compara;PhylomeDB;Hieranoid;Panther;Roundup;TreeFam;Inparanoid;OrthoFinder;OMA;ParaSite-Compara	Is an ortholog of human TBCK (TBC1 domain containing kinase). Is predicted to have GTPase activator activity and Rab GTPase binding activity.
WBGene00003822	nsy-1	F59A6.1	HGNC:MAP3K5|OrthoInspector;EnsEMBL-Compara;PhylomeDB;Hieranoid;Panther;TreeFam;Inparanoid;OrthoFinder;OMA;ParaSite-Compara, HGNC:MAP3K15|EnsEMBL-Compara;OrthoInspector;PhylomeDB;Hieranoid;Panther;Roundup;TreeFam;OrthoFinder;Inparanoid;OMA, HGNC:MAP3K6|OrthoInspector;EnsEMBL-Compara;PhylomeDB;Hieranoid;Panther;TreeFam;Inparanoid;OrthoFinder;OMA	Is an ortholog of human MAP3K15 (mitogen-activated protein kinase kinase kinase 15) and MAP3K5 (mitogen-activated protein kinase kinase kinase 5). Exhibits MAP kinase kinase kinase activity\; mitogen-activated protein kinase kinase binding activity\; and protein kinase activator activity. Is involved in several processes, including defense response to other organism\; p38MAPK cascade\; and positi…
WBGene00019086	F59A6.4	F59A6.4	N.A.	Is predicted to have protein serine\/threonine kinase activity.
WBGene00017277	F09C12.2	F09C12.2	HGNC:MAPK7|EnsEMBL-Compara;OrthoInspector;Hieranoid;Panther;OrthoFinder;ParaSite-Compara	Is an ortholog of human MAPK7 (mitogen-activated protein kinase 7). Is predicted to have ATP binding activity and MAP kinase activity.
WBGene00016416	C34F11.5	C34F11.5	N.A.	Is predicted to have ATP binding activity and non-membrane spanning protein tyrosine kinase activity.
WBGene00022780	ZK622.1	ZK622.1	HGNC:FER|Panther;EnsEMBL-Compara;OrthoFinder;PhylomeDB, HGNC:FES|EnsEMBL-Compara;Panther;OrthoFinder;PhylomeDB	Is an ortholog of human FER (FER tyrosine kinase) and FES (FES proto-oncogene, tyrosine kinase). Is predicted to have non-membrane spanning protein tyrosine kinase activity and signaling receptor binding activity.
WBGene00001538	gcy-12	F08B1.2	HGNC:GUCY2C|EnsEMBL-Compara;Panther;OrthoFinder	Is an ortholog of human GUCY2C (guanylate cyclase 2C). Exhibits guanylate cyclase activity. Is involved in negative regulation of dauer larval development\; regulation of growth\; and regulation of locomotion involved in locomotory behavior. Localizes to dendrite\; non-motile cilium\; and perikaryon. Is expressed in excretory gland cell\; ganglia\; head muscle\; and head neurons.
WBGene00004034	pkc-3	F09E5.1	HGNC:PRKCZ|OrthoInspector;EnsEMBL-Compara;PhylomeDB;Hieranoid;Panther;Roundup;Inparanoid;OrthoFinder;OMA, HGNC:PRKCI|OrthoInspector;EnsEMBL-Compara;PhylomeDB;Hieranoid;Panther;Roundup;Inparanoid;OrthoFinder;OMA, HGNC:PRKCA|ParaSite-Compara, HGNC:PKN3|ParaSite-Compara	Is an ortholog of human PRKCI (protein kinase C iota) and PRKCZ (protein kinase C zeta). Exhibits protein domain specific binding activity and protein serine\/threonine kinase activity. Is involved in several processes, including defense response to fungus\; gonad development\; and peptidyl-serine phosphorylation. Localizes to apical plasma membrane\; cortical actin cytoskeleton\; and cytosol. Is…
WBGene00017137	pink-1	EEED8.9	HGNC:PINK1|OrthoInspector;PhylomeDB;Panther;Roundup;Inparanoid;OrthoFinder;EnsEMBL-Compara;Hieranoid;ParaSite-Compara	Is an ortholog of human PINK1 (PTEN induced kinase 1). Is predicted to have protein serine\/threonine kinase activity. Is involved in several processes, including autophagy of mitochondrion\; axon extension involved in axon guidance\; and positive regulation of protein ubiquitination. Localizes to mitochondrion. Is expressed in hermaphrodite distal tip cell\; intestine\; neurons\; pharynx\; and v…
WBGene00022670	ZK177.2	ZK177.2	HGNC:HASPIN|Panther;OrthoFinder;PhylomeDB	Is an ortholog of human HASPIN (histone H3 associated protein kinase). Is predicted to have histone kinase activity (H3-T3 specific).
WBGene00006988	zyg-1	F59E12.2	HGNC:CAMKV|ParaSite-Compara, HGNC:MYLK2|ParaSite-Compara, HGNC:DCLK1|ParaSite-Compara, HGNC:DCLK2|ParaSite-Compara, HGNC:PHKG2|ParaSite-Compara, HGNC:CAMK1G|ParaSite-Compara	Exhibits identical protein binding activity and protein serine\/threonine kinase activity. Is involved in several processes, including microtubule cytoskeleton organization\; positive regulation of cell cycle\; and regulation of cellular protein localization. Localizes to centriole and centrosome. Human ortholog(s) of this gene are implicated in glycogen storage disease IXc and hypertrophic cardi…
WBGene00019119	F59E12.3	F59E12.3	N.A.	Is predicted to have protein serine\/threonine kinase activity.
WBGene00016111	C25H3.1	C25H3.1	N.A.	Is predicted to have protein serine\/threonine kinase activity.
WBGene00017895	vrk-1	F28B12.3	HGNC:VRK1|EnsEMBL-Compara;OrthoInspector;PhylomeDB;Hieranoid;Panther;Roundup;Inparanoid;OrthoFinder, HGNC:VRK2|EnsEMBL-Compara;OrthoInspector;PhylomeDB;Hieranoid;Panther;Roundup;OrthoFinder;Inparanoid, HGNC:VRK3|Panther;OrthoInspector;EnsEMBL-Compara;PhylomeDB	Is an ortholog of human VRK1 (VRK serine\/threonine kinase 1) and VRK2 (VRK serine\/threonine kinase 2). Exhibits protein kinase activity. Is involved in several processes, including cell fate specification\; gonad development\; and regulation of fibroblast growth factor receptor signaling pathway. Localizes to chromatin and nuclear envelope. Is expressed in several structures, including P3.p her…
WBGene00016236	heri-1	C29H12.5	N.A.	Is predicted to have protein serine\/threonine kinase activity. Is expressed in several structures, including Psub3\; Psub4\; Z2\; Z3\; and germ cell.
WBGene00004860	sma-6	C32D5.2	HGNC:TGFBR1|Hieranoid;OrthoInspector;OrthoFinder;EnsEMBL-Compara;ParaSite-Compara, HGNC:BMPR1A|OrthoInspector;EnsEMBL-Compara;PhylomeDB;Panther;Roundup;TreeFam;OrthoFinder;Inparanoid;ParaSite-Compara, HGNC:BMPR1B|EnsEMBL-Compara;OrthoInspector;PhylomeDB;Panther;Roundup;TreeFam;OrthoFinder;Inparanoid;OMA, HGNC:ACVR1C|Hieranoid;OrthoInspector;EnsEMBL-Compara;OrthoFinder;ParaSite-Compara, HGNC:ACVR1…	Is an ortholog of human BMPR1A (bone morphogenetic protein receptor type 1A) and BMPR1B (bone morphogenetic protein receptor type 1B). Exhibits BMP binding activity. Is involved in several processes, including defense response to other organism\; nematode male tail tip morphogenesis\; and positive regulation of macromolecule metabolic process. Is expressed in ASI\; hypodermis\; intestinal cell\; …
WBGene00016963	C56C10.6	C56C10.6	N.A.	Is predicted to have protein serine\/threonine kinase activity.
WBGene00018839	F54H5.2	F54H5.2	N.A.	Is predicted to have protein serine\/threonine kinase activity.
WBGene00020580	T19D12.5	T19D12.5	N.A.	Is predicted to have protein serine\/threonine kinase activity.
WBGene00018301	F41G3.5	F41G3.5	N.A.	Is predicted to have protein serine\/threonine kinase activity.
WBGene00015087	B0252.1	B0252.1	HGNC:FLT4|ParaSite-Compara, HGNC:EPHA3|ParaSite-Compara, HGNC:EPHA10|ParaSite-Compara, HGNC:AXL|ParaSite-Compara, HGNC:EPHB6|ParaSite-Compara, HGNC:ALK|ParaSite-Compara, HGNC:NTRK2|ParaSite-Compara, HGNC:INSRR|ParaSite-Compara, HGNC:EPHA6|ParaSite-Compara, HGNC:PDGFRA|ParaSite-Compara, HGNC:LMTK2|ParaSite-Compara, HGNC:DDR1|ParaSite-Compara, HGNC:NTRK1|ParaSite-Compara, HGNC:IGF1R|ParaSite-Compar…	Is predicted to have transmembrane receptor protein tyrosine kinase activity. Human ortholog(s) of this gene are implicated in several diseases, including bone development disease (multiple)\; gastrointestinal system cancer (multiple)\; and hematologic cancer (multiple).
WBGene00015203	cdk-11.1	B0495.2	HGNC:CDK11A|OrthoInspector;Panther;Roundup;TreeFam;Inparanoid;EnsEMBL-Compara;Hieranoid;OrthoFinder, HGNC:CDK11B|EnsEMBL-Compara;OrthoInspector;Hieranoid;Panther;Roundup;TreeFam;Inparanoid;OrthoFinder, HGNC:CDKL4|ParaSite-Compara, HGNC:CDK4|ParaSite-Compara, HGNC:CDK6|ParaSite-Compara, HGNC:CDKL5|ParaSite-Compara, HGNC:CDKL3|ParaSite-Compara, HGNC:CDK14|ParaSite-Compara, HGNC:CDK15|ParaSite-Compa…	Is an ortholog of human CDK11A (cyclin dependent kinase 11A) and CDK11B (cyclin dependent kinase 11B). Is predicted to have cyclin-dependent protein serine\/threonine kinase activity. Is involved in gamete generation and positive regulation of embryonic development. Localizes to cytoplasm and nucleus. Is expressed in gonadal sheath cell\; somatic cell\; and somatic gonad. Human ortholog(s) of thi…
WBGene00002147	ire-1	C41C4.4	HGNC:ERN1|EnsEMBL-Compara;OrthoInspector;PhylomeDB;Hieranoid;Panther;Roundup;TreeFam;Inparanoid;OrthoFinder;OMA	Is an ortholog of human ERN1 (endoplasmic reticulum to nucleus signaling 1). Exhibits endoribonuclease activity. Is involved in several processes, including endoplasmic reticulum unfolded protein response\; positive regulation of intrinsic apoptotic signaling pathway by p53 class mediator\; and positive regulation of transcription from RNA polymerase II promoter in response to endoplasmic reticul…
WBGene00011466	T05C12.1	T05C12.1	N.A.	Is predicted to have protein serine\/threonine kinase activity.
WBGene00009402	F35C11.3	F35C11.3	N.A.	Is predicted to have protein serine\/threonine kinase activity.
WBGene00010681	mak-1	K08F8.1	HGNC:MAPKAPK3|Panther;OrthoFinder;PhylomeDB, HGNC:MAPKAPK2|Panther;OrthoFinder;PhylomeDB, HGNC:DCX|ParaSite-Compara, HGNC:CAMK4|ParaSite-Compara	Is an ortholog of human MAPKAPK2 (MAPK activated protein kinase 2) and MAPKAPK3 (MAPK activated protein kinase 3). Exhibits protein kinase activity and protein kinase binding activity. Is involved in adult locomotory behavior\; behavioral response to nicotine\; and protein autophosphorylation. Localizes to A band. Is expressed in body wall muscle cell and tail. Human ortholog(s) of this gene are …
WBGene00002299	let-23	ZK1067.1	HGNC:ERBB3|EnsEMBL-Compara;OrthoInspector;PhylomeDB;TreeFam;OrthoFinder;OMA;Panther, HGNC:EGFR|OrthoInspector;EnsEMBL-Compara;PhylomeDB;Roundup;TreeFam;OrthoFinder;OMA;Panther, HGNC:ERBB4|OrthoInspector;EnsEMBL-Compara;PhylomeDB;Roundup;TreeFam;OrthoFinder;OMA;Panther;ParaSite-Compara, HGNC:ERBB2|EnsEMBL-Compara;OrthoInspector;PhylomeDB;TreeFam;OrthoFinder;OMA;Panther;ParaSite-Compara, HGNC:FLT4|…	Is an ortholog of human ERBB4 (erb-b2 receptor tyrosine kinase 4). Is predicted to have epidermal growth factor-activated receptor activity. Is involved in several processes, including determination of adult lifespan\; ovulation\; and positive regulation of vulval development. Localizes to several cellular components, including apical plasma membrane\; basolateral plasma membrane\; and lateral pl…
WBGene00000289	cam-1	C01G6.8	HGNC:ROR1|OrthoInspector;EnsEMBL-Compara;PhylomeDB;Hieranoid;Panther;Roundup;TreeFam;OrthoFinder;Inparanoid;OMA;ParaSite-Compara, HGNC:ROR2|EnsEMBL-Compara;OrthoInspector;PhylomeDB;Hieranoid;Panther;Roundup;TreeFam;Inparanoid;OrthoFinder;OMA;ParaSite-Compara, HGNC:FLT4|ParaSite-Compara, HGNC:EPHA10|ParaSite-Compara, HGNC:EPHB6|ParaSite-Compara, HGNC:NTRK2|ParaSite-Compara, HGNC:INSRR|ParaSite-Com…	Is an ortholog of human ROR1 (receptor tyrosine kinase like orphan receptor 1) and ROR2 (receptor tyrosine kinase like orphan receptor 2). Exhibits Wnt-protein binding activity\; frizzled binding activity\; and transmembrane receptor protein tyrosine kinase activity. Is involved in generation of neurons\; neuroblast migration\; and peptidyl-tyrosine phosphorylation. Localizes to several cellular …
WBGene00002199	kin-15	M176.6	HGNC:KIT|EnsEMBL-Compara;OrthoInspector;Panther;ParaSite-Compara, HGNC:PDGFRA|EnsEMBL-Compara;OrthoInspector;Panther;ParaSite-Compara, HGNC:PDGFRB|EnsEMBL-Compara;OrthoInspector;Panther;ParaSite-Compara, HGNC:CSF1R|EnsEMBL-Compara;OrthoInspector;Panther;ParaSite-Compara, HGNC:FLT3|Panther;OrthoInspector;EnsEMBL-Compara;ParaSite-Compara, HGNC:FLT4|ParaSite-Compara, HGNC:EPHA10|ParaSite-Compara, HG…	Is an ortholog of several human genes including KIT (KIT proto-oncogene, receptor tyrosine kinase)\; PDGFRA (platelet derived growth factor receptor alpha)\; and PDGFRB (platelet derived growth factor receptor beta). Is predicted to have transmembrane receptor protein tyrosine kinase activity. Is expressed in hyp6 and hyp7 syncytium. Human ortholog(s) of this gene are implicated in several diseas…
WBGene00014813	M176.9	M176.9	HGNC:FER|EnsEMBL-Compara;Inparanoid;Panther;OrthoFinder, HGNC:FES|Panther;Inparanoid;EnsEMBL-Compara;OrthoFinder	Is an ortholog of human FER (FER tyrosine kinase) and FES (FES proto-oncogene, tyrosine kinase). Is predicted to have ATP binding activity and non-membrane spanning protein tyrosine kinase activity.
WBGene00011168	R09D1.12	R09D1.12	HGNC:KIT|EnsEMBL-Compara;OrthoInspector;Panther;ParaSite-Compara, HGNC:PDGFRA|EnsEMBL-Compara;OrthoInspector;Panther;ParaSite-Compara, HGNC:PDGFRB|EnsEMBL-Compara;OrthoInspector;Panther;ParaSite-Compara, HGNC:CSF1R|Panther;OrthoInspector;EnsEMBL-Compara;ParaSite-Compara, HGNC:FLT3|Panther;OrthoInspector;EnsEMBL-Compara;ParaSite-Compara, HGNC:FLT4|ParaSite-Compara, HGNC:EPHA10|ParaSite-Compara, HG…	Is an ortholog of several human genes including CSF1R (colony stimulating factor 1 receptor)\; KIT (KIT proto-oncogene, receptor tyrosine kinase)\; and PDGFRA (platelet derived growth factor receptor alpha). Is predicted to have transmembrane receptor protein tyrosine kinase activity. Human ortholog(s) of this gene are implicated in several diseases, including bone development disease (multiple)\…
WBGene00001530	gcy-3	R134.1	HGNC:GUCY2F|EnsEMBL-Compara;TreeFam;Panther, HGNC:GUCY2D|Panther;TreeFam;EnsEMBL-Compara	Is an ortholog of human GUCY2D (guanylate cyclase 2D, retinal) and GUCY2F (guanylate cyclase 2F, retinal). Is predicted to have guanylate cyclase activity and peptide receptor activity. Is expressed in ASER\; ASIL\; ASIR\; and PVT.
WBGene00001529	gcy-2	R134.2	HGNC:GUCY2F|EnsEMBL-Compara;TreeFam;Panther, HGNC:GUCY2D|EnsEMBL-Compara;TreeFam;Panther	Is an ortholog of human GUCY2D (guanylate cyclase 2D, retinal) and GUCY2F (guanylate cyclase 2F, retinal). Is predicted to have guanylate cyclase activity and peptide receptor activity. Is expressed in PVT and lateral ganglion.
WBGene00001528	gcy-1	AH6.1	HGNC:GUCY2F|EnsEMBL-Compara;TreeFam;Panther, HGNC:GUCY2D|EnsEMBL-Compara;TreeFam;Panther	Is an ortholog of human GUCY2D (guanylate cyclase 2D, retinal) and GUCY2F (guanylate cyclase 2F, retinal). Is predicted to have guanylate cyclase activity and peptide receptor activity. Is involved in several processes, including chemosensory behavior\; response to lithium ion\; and response to potassium ion. Is expressed in PVT\; head neurons\; and intestine.
WBGene00006938	wee-1.1	F35H8.7	HGNC:PKMYT1|EnsEMBL-Compara;OrthoInspector;PhylomeDB;Panther;TreeFam;Inparanoid;OrthoFinder;ParaSite-Compara	Is an ortholog of human PKMYT1 (protein kinase, membrane associated tyrosine\/threonine 1). Is predicted to have protein serine\/threonine kinase activity. Is expressed in Ea and Ep.
WBGene00006940	wee-1.3	Y53C12A.1	HGNC:PKMYT1|EnsEMBL-Compara;OrthoInspector;PhylomeDB;Panther;Roundup;OrthoFinder;ParaSite-Compara	Is an ortholog of human PKMYT1 (protein kinase, membrane associated tyrosine\/threonine 1). Exhibits cyclin-dependent protein serine\/threonine kinase inhibitor activity. Is involved in several processes, including negative regulation of meiotic cell cycle process involved in oocyte maturation\; negative regulation of ovulation\; and oocyte maturation. Localizes to several cellular components, in…
WBGene00003863	old-2	ZK938.5	HGNC:KIT|Panther;OrthoInspector;EnsEMBL-Compara;ParaSite-Compara, HGNC:PDGFRA|Panther;OrthoInspector;EnsEMBL-Compara;ParaSite-Compara, HGNC:PDGFRB|Panther;OrthoInspector;EnsEMBL-Compara;ParaSite-Compara, HGNC:CSF1R|EnsEMBL-Compara;OrthoInspector;Panther;ParaSite-Compara, HGNC:FLT3|Panther;EnsEMBL-Compara;OrthoInspector;ParaSite-Compara, HGNC:FLT4|ParaSite-Compara, HGNC:EPHA3|ParaSite-Compara, HGN…	Is an ortholog of several human genes including KIT (KIT proto-oncogene, receptor tyrosine kinase)\; PDGFRA (platelet derived growth factor receptor alpha)\; and PDGFRB (platelet derived growth factor receptor beta). Is predicted to have transmembrane receptor protein tyrosine kinase activator activity and transmembrane receptor protein tyrosine kinase activity. Is involved in determination of ad…
WBGene00003862	old-1	C08H9.5	HGNC:KIT|EnsEMBL-Compara;OrthoInspector;Panther;ParaSite-Compara, HGNC:PDGFRA|Panther;OrthoInspector;EnsEMBL-Compara;ParaSite-Compara, HGNC:PDGFRB|Panther;EnsEMBL-Compara;OrthoInspector;ParaSite-Compara, HGNC:CSF1R|Panther;OrthoInspector;EnsEMBL-Compara;ParaSite-Compara, HGNC:FLT3|Panther;OrthoInspector;EnsEMBL-Compara;ParaSite-Compara, HGNC:FLT4|ParaSite-Compara, HGNC:EPHA3|ParaSite-Compara, HGN…	Is an ortholog of several human genes including CSF1R (colony stimulating factor 1 receptor)\; KIT (KIT proto-oncogene, receptor tyrosine kinase)\; and PDGFRA (platelet derived growth factor receptor alpha). Is predicted to have transmembrane receptor protein tyrosine kinase activity. Is expressed in hypodermis\; male gonad\; neurons\; and pharynx. Human ortholog(s) of this gene are implicated in…
WBGene00007468	C08H9.8	C08H9.8	N.A.	Is affected by clk-1 and daf-2 based on microarray studies. Is affected by four chemicals including Psoralens\; allantoin\; and Sirolimus based on RNA-seq studies.
WBGene00011039	R05H5.4	R05H5.4	HGNC:FER|Panther;OrthoFinder;PhylomeDB, HGNC:FES|Panther;OrthoFinder;PhylomeDB	Is an ortholog of human FER (FER tyrosine kinase) and FES (FES proto-oncogene, tyrosine kinase). Is predicted to have non-membrane spanning protein tyrosine kinase activity and signaling receptor binding activity.
WBGene00001531	gcy-4	ZK970.5	N.A.	Is predicted to have guanylate cyclase activity and peptide receptor activity. Is involved in several processes, including chemosensory behavior\; chemotaxis\; and response to salt. Is expressed in ASER.
WBGene00011304	mnk-1	R166.5	HGNC:MKNK2|EnsEMBL-Compara;OrthoInspector;PhylomeDB;Panther;Inparanoid;OrthoFinder;ParaSite-Compara, HGNC:MKNK1|EnsEMBL-Compara;OrthoInspector;PhylomeDB;Panther;Roundup;TreeFam;Inparanoid;OrthoFinder	Is an ortholog of human MKNK1 (MAPK interacting serine\/threonine kinase 1). Is predicted to have calcium-dependent protein serine\/threonine kinase activity and calmodulin binding activity. Is involved in behavioral response to nicotine\; determination of adult lifespan\; and regulation of protein deneddylation. Localizes to nucleus. Is expressed in body wall musculature\; intestine\; pharyngeal…
WBGene00007563	C14A4.13	C14A4.13	N.A.	Is predicted to have protein serine\/threonine kinase activity.
WBGene00010991	R03D7.5	R03D7.5	N.A.	Is predicted to have protein serine\/threonine kinase activity.
WBGene00012207	W02B12.12	W02B12.12	HGNC:BRSK1|ParaSite-Compara, HGNC:TSSK2|ParaSite-Compara, HGNC:HUNK|ParaSite-Compara, HGNC:NUAK2|ParaSite-Compara, HGNC:TSSK6|ParaSite-Compara, HGNC:NUAK1|ParaSite-Compara, HGNC:BRSK2|ParaSite-Compara	Is predicted to have protein serine\/threonine kinase activity.
WBGene00007028	trr-1	C47D12.1	HGNC:TRRAP|EnsEMBL-Compara;OrthoInspector;PhylomeDB;Hieranoid;Panther;TreeFam;OrthoFinder;Inparanoid;OMA, HGNC:PRKDC|ParaSite-Compara, HGNC:ATM|ParaSite-Compara	Is an ortholog of human TRRAP (transformation\/transcription domain associated protein). Is predicted to have transcription coregulator activity. Is involved in negative regulation of vulval development\; positive regulation of growth rate\; and reproduction. Localizes to condensed chromosome and nucleus. Is expressed in several structures, including P3.p hermaphrodite\; P4.p hermaphrodite\; P5.p…
WBGene00014151	vps-15	ZK930.1	HGNC:PIK3R4|OrthoInspector;EnsEMBL-Compara;PhylomeDB;Hieranoid;Panther;Roundup;TreeFam;Inparanoid;OrthoFinder;OMA;ParaSite-Compara	Is an ortholog of human PIK3R4 (phosphoinositide-3-kinase regulatory subunit 4). Is predicted to have protein serine\/threonine kinase activity.
WBGene00009867	F49C5.4	F49C5.4	HGNC:NIM1K|EnsEMBL-Compara;OrthoInspector;PhylomeDB;Hieranoid;Panther;Roundup;TreeFam;OrthoFinder;Inparanoid;OMA;ParaSite-Compara	Is an ortholog of human NIM1K (NIM1 serine\/threonine protein kinase). Is predicted to have protein serine\/threonine kinase activity.
WBGene00012605	Y38F1A.1	Y38F1A.1	N.A.	Is enriched in ALM\; PLM\; germ line\; muscle cell\; and in male based on proteomic\; microarray\; and RNA-seq studies. Is affected by several genes including daf-16\; daf-2\; and age-1 based on microarray and RNA-seq studies. Is affected by fifteen chemicals including nicotinic acid\; methylmercuric chloride\; and Rotenone based on RNA-seq and microarray studies.
WBGene00013591	gcn-2	Y81G3A.3	HGNC:EIF2AK4|OrthoInspector;EnsEMBL-Compara;PhylomeDB;Hieranoid;Panther;Roundup;TreeFam;OrthoFinder;Inparanoid;OMA, HGNC:PDIK1L|ParaSite-Compara, HGNC:WEE1|ParaSite-Compara, HGNC:EIF2AK2|ParaSite-Compara, HGNC:EIF2AK1|ParaSite-Compara, HGNC:STK35|ParaSite-Compara, HGNC:WEE2|ParaSite-Compara	Is an ortholog of human EIF2AK4 (eukaryotic translation initiation factor 2 alpha kinase 4). Is predicted to have protein kinase activity. Is involved in several processes, including mitochondrial unfolded protein response\; positive regulation of macromolecule metabolic process\; and stress granule assembly.
WBGene00012731	Y39G8C.2	Y39G8C.2	N.A.	Is predicted to have protein serine\/threonine kinase activity.
WBGene00010719	K09E4.1	K09E4.1	N.A.	Is predicted to have protein serine\/threonine kinase activity.
WBGene00012981	Y48B6A.10	Y48B6A.10	HGNC:HASPIN|Panther;OrthoFinder;PhylomeDB	Is an ortholog of human HASPIN (histone H3 associated protein kinase). Is predicted to have histone kinase activity (H3-T3 specific).
WBGene00003931	pat-4	C29F9.7	HGNC:ILK|EnsEMBL-Compara;OrthoInspector;PhylomeDB;Hieranoid;Panther;Roundup;TreeFam;OrthoFinder;Inparanoid;OMA;ParaSite-Compara	Is an ortholog of human ILK (integrin linked kinase). Exhibits integrin binding activity and protein binding activity, bridging. Is involved in several processes, including hermaphrodite genitalia morphogenesis\; mitochondrion organization\; and positive regulation of supramolecular fiber organization. Localizes to several cellular components, including adherens junction\; basal plasma membrane\;…
WBGene00006894	ver-1	T17A3.1	HGNC:FLT1|Hieranoid;OrthoInspector;Inparanoid;PhylomeDB;EnsEMBL-Compara;ParaSite-Compara, HGNC:KIT|Panther;OrthoInspector;EnsEMBL-Compara;PhylomeDB;ParaSite-Compara, HGNC:PDGFRA|EnsEMBL-Compara;OrthoInspector;Panther;PhylomeDB;ParaSite-Compara, HGNC:PDGFRB|Panther;OrthoInspector;EnsEMBL-Compara;PhylomeDB;ParaSite-Compara, HGNC:CSF1R|Panther;OrthoInspector;EnsEMBL-Compara;PhylomeDB;ParaSite-Compar…	Is an ortholog of human FLT1 (fms related receptor tyrosine kinase 1). Is predicted to have transmembrane receptor protein tyrosine kinase activity. Is involved in nematode male tail tip morphogenesis. Is expressed in intestinal muscle\; intestine\; and neuronal sheath cell. Human ortholog(s) of this gene are implicated in several diseases, including bone development disease (multiple)\; gastroin…
WBGene00006895	ver-2	T17A3.8	N.A.	Is expressed in ADLL and ADLR.
WBGene00001709	grk-2	W02B3.2	HGNC:GRK3|OrthoInspector;EnsEMBL-Compara;PhylomeDB;Hieranoid;Panther;Roundup;TreeFam;OrthoFinder;Inparanoid;OMA, HGNC:GRK2|OrthoInspector;EnsEMBL-Compara;PhylomeDB;Hieranoid;Panther;Roundup;TreeFam;OrthoFinder;Inparanoid;OMA, HGNC:GRK4|ParaSite-Compara, HGNC:GRK1|ParaSite-Compara, HGNC:GRK5|ParaSite-Compara, HGNC:GRK7|ParaSite-Compara, HGNC:GRK6|ParaSite-Compara	Is an ortholog of human GRK2 (G protein-coupled receptor kinase 2) and GRK3 (G protein-coupled receptor kinase 3). Is predicted to have ATP binding activity and G protein-coupled receptor kinase activity. Is involved in several processes, including positive regulation of growth rate\; positive regulation of oviposition\; and serotonin catabolic process. Is expressed in neurons and vulval muscle. …
WBGene00016030	sel-15	C24A1.3	HGNC:FPGT-TNNI3K|OrthoInspector;EnsEMBL-Compara;PhylomeDB;Hieranoid;Roundup;TreeFam;Inparanoid;OMA;OrthoFinder;ParaSite-Compara, HGNC:TNNI3K|OMA;TreeFam;EnsEMBL-Compara;ParaSite-Compara	Is an ortholog of human FPGT-TNNI3K (FPGT-TNNI3K readthrough). Is predicted to have protein kinase activity.
WBGene00021022	W04B5.5	W04B5.5	HGNC:PDPK1|PhylomeDB;Panther;Roundup;TreeFam;OrthoFinder, HGNC:PRKCD|ParaSite-Compara, HGNC:PRKCQ|ParaSite-Compara, HGNC:AKT2|ParaSite-Compara, HGNC:AKT3|ParaSite-Compara	Is an ortholog of human PDPK1 (3-phosphoinositide dependent protein kinase 1). Is predicted to have protein serine\/threonine kinase activity. Human ortholog(s) of this gene are implicated in autoimmune lymphoproliferative syndrome type 3 and type 2 diabetes mellitus.
WBGene00004183	prk-2	F45H7.4	HGNC:PIM1|OrthoInspector;EnsEMBL-Compara;PhylomeDB;Hieranoid;Panther;Inparanoid;OrthoFinder, HGNC:PIM2|OrthoInspector;EnsEMBL-Compara;PhylomeDB;Panther;Roundup;Inparanoid;OrthoFinder;ParaSite-Compara, HGNC:PIM3|EnsEMBL-Compara;OrthoInspector;PhylomeDB;Hieranoid;Roundup;OrthoFinder;Inparanoid;Panther	Is an ortholog of human PIM2 (Pim-2 proto-oncogene, serine\/threonine kinase) and PIM3 (Pim-3 proto-oncogene, serine\/threonine kinase). Is predicted to have protein serine\/threonine kinase activity. Is involved in regulation of synapse assembly.
WBGene00002202	kin-19	C03C10.1	HGNC:CSNK1A1|OrthoInspector;PhylomeDB;Hieranoid;Panther;Roundup;Inparanoid;OrthoFinder;OMA;EnsEMBL-Compara;ParaSite-Compara, HGNC:CSNK1A1L|OrthoInspector;PhylomeDB;Hieranoid;Panther;Inparanoid;OrthoFinder;OMA	Is an ortholog of human CSNK1A1 (casein kinase 1 alpha 1). Is predicted to have protein serine\/threonine kinase activity. Is involved in Wnt signaling pathway, regulating spindle positioning and positive regulation of proteasomal ubiquitin-dependent protein catabolic process. Localizes to centrosome\; cytoplasm\; and nucleus. Is expressed in several structures, including BDU\; marginal cell\; se…
WBGene00007269	C03C10.2	C03C10.2	N.A.	Is predicted to have protein serine\/threonine kinase activity.
WBGene00003401	mpk-1	F43C1.2	HGNC:MAPK1|OrthoInspector;EnsEMBL-Compara;PhylomeDB;Hieranoid;Panther;Roundup;TreeFam;OrthoFinder;Inparanoid;OMA;ParaSite-Compara, HGNC:MAPK3|OrthoInspector;EnsEMBL-Compara;PhylomeDB;Hieranoid;Panther;TreeFam;Inparanoid;OrthoFinder	Is an ortholog of human MAPK1 (mitogen-activated protein kinase 1). Exhibits MAP kinase activity. Is involved in several processes, including cellular protein modification process\; oocyte maturation\; and positive regulation of macromolecule metabolic process. Localizes to cytoplasm and nucleus. Is expressed in F cell\; U cell\; germ line\; gonad\; and oocyte.
WBGene00007135	cdk-12	B0285.1	HGNC:CDK13|EnsEMBL-Compara;OrthoInspector;PhylomeDB;Hieranoid;Panther;Roundup;TreeFam;Inparanoid;OrthoFinder, HGNC:CDK12|OrthoInspector;EnsEMBL-Compara;PhylomeDB;Hieranoid;Panther;Roundup;TreeFam;Inparanoid;OrthoFinder;ParaSite-Compara, HGNC:CDK4|ParaSite-Compara, HGNC:CDK6|ParaSite-Compara, HGNC:CDK15|ParaSite-Compara, HGNC:CDKL2|ParaSite-Compara, HGNC:CDK14|ParaSite-Compara, HGNC:CDKL3|ParaSite…	Is an ortholog of human CDK12 (cyclin dependent kinase 12). Is predicted to have several functions, including cyclin binding activity\; kinase activity\; and transcription factor binding activity. Is involved in nematode larval development\; phosphorylation of RNA polymerase II C-terminal domain\; and regulation of histone H3-K36 trimethylation. Localizes to chromosome. Is expressed in several st…
WBGene00007791	C28A5.6	C28A5.6	N.A.	Is predicted to have protein serine\/threonine kinase activity.
WBGene00009115	F25F2.1	F25F2.1	N.A.	Is predicted to have protein serine\/threonine kinase activity.
WBGene00004762	sel-5	F35G12.3	HGNC:BMP2K|EnsEMBL-Compara;PhylomeDB;Panther;Roundup;Inparanoid;OrthoFinder, HGNC:AAK1|EnsEMBL-Compara;OrthoInspector;PhylomeDB;Roundup;TreeFam;Inparanoid;OrthoFinder;Panther;ParaSite-Compara	Is an ortholog of human AAK1 (AP2 associated kinase 1). Is predicted to have AP-2 adaptor complex binding activity and protein serine\/threonine kinase activity. Is used to study Parkinson's disease.
WBGene00017802	F26A1.3	F26A1.3	N.A.	Is predicted to have protein serine\/threonine kinase activity.
WBGene00017803	F26A1.4	F26A1.4	N.A.	Is predicted to have protein serine\/threonine kinase activity.
WBGene00000767	coq-8	C35D10.4	HGNC:COQ8B|EnsEMBL-Compara;OrthoInspector;PhylomeDB;Hieranoid;Panther;Roundup;TreeFam;Inparanoid;OrthoFinder, HGNC:COQ8A|OrthoInspector;EnsEMBL-Compara;PhylomeDB;Hieranoid;Panther;Roundup;TreeFam;Inparanoid;OrthoFinder	Is an ortholog of human COQ8A (coenzyme Q8A) and COQ8B (coenzyme Q8B). Is predicted to have kinase activity. Is involved in ubiquinone biosynthetic process. Is expressed in coelomocyte\; hypodermis\; muscle cell\; and neurons.
WBGene00016673	ttbk-6	C45G9.1	N.A.	Is predicted to have protein serine\/threonine kinase activity. Is expressed in ASKL\; ASKR\; amphid neurons\; and neurons.
WBGene00020531	T15B12.2	T15B12.2	N.A.	Is predicted to have protein serine\/threonine kinase activity.
WBGene00020966	W03A5.1	W03A5.1	HGNC:FLT4|ParaSite-Compara, HGNC:EPHA10|ParaSite-Compara, HGNC:AXL|ParaSite-Compara, HGNC:EPHB6|ParaSite-Compara, HGNC:EPHB3|ParaSite-Compara, HGNC:KIT|ParaSite-Compara, HGNC:IGF1R|ParaSite-Compara, HGNC:NTRK2|ParaSite-Compara, HGNC:EPHA4|ParaSite-Compara, HGNC:TEK|ParaSite-Compara, HGNC:ROR1|ParaSite-Compara, HGNC:EPHB4|ParaSite-Compara, HGNC:ERBB4|ParaSite-Compara, HGNC:DDR1|ParaSite-Compara, H…	Is predicted to have transmembrane receptor protein tyrosine kinase activity. Human ortholog(s) of this gene are implicated in several diseases, including bone development disease (multiple)\; gastrointestinal system cancer (multiple)\; and hematologic cancer (multiple).
WBGene00004114	pqn-25	D1044.3	N.A.	Is expressed in intestine and pharyngeal gland cell. Is predicted to encode a protein with the following domains: Lustrin, cysteine-rich repeated domain\; EB module\; EB domain\; Cysteine-rich repeat\; and Lustrin, cysteine-rich repeated.
WBGene00000900	daf-4	C05D2.1	HGNC:ACVR2B|OrthoInspector;Hieranoid;Panther;Roundup;Inparanoid;EnsEMBL-Compara;ParaSite-Compara, HGNC:ACVR2A|Hieranoid;Panther;Inparanoid;EnsEMBL-Compara;ParaSite-Compara, HGNC:TGFBR2|Panther;EnsEMBL-Compara;Inparanoid;ParaSite-Compara, HGNC:BMPR2|ParaSite-Compara, HGNC:ACVRL1|ParaSite-Compara, HGNC:ACVR1B|ParaSite-Compara, HGNC:ACVR1|ParaSite-Compara, HGNC:BMPR1A|ParaSite-Compara, HGNC:ACVR1C|P…	Is an ortholog of human ACVR2B (activin A receptor type 2B). Exhibits BMP binding activity. Is involved in several processes, including dauer entry\; defense response to other organism\; and regulation of transcription by RNA polymerase II. Localizes to plasma membrane. Is expressed in several structures, including ganglia\; intestine\; pharynx\; somatic nervous system\; and tail hypodermis. Huma…
WBGene00000518	ckk-1	C05H8.1	HGNC:CAMKK1|EnsEMBL-Compara;OrthoInspector;PhylomeDB;Hieranoid;Roundup;TreeFam;OrthoFinder;Inparanoid;OMA;ParaSite-Compara, HGNC:CAMKK2|OrthoInspector;EnsEMBL-Compara;PhylomeDB;Hieranoid;Panther;TreeFam;Inparanoid;OrthoFinder	Is an ortholog of human CAMKK1 (calcium\/calmodulin dependent protein kinase kinase 1). Exhibits calmodulin binding activity and calmodulin-dependent protein kinase activity. Is involved in several processes, including positive regulation of CREB transcription factor activity\; positive regulation of protein kinase activity\; and transcription, DNA-templated. Localizes to cytoplasm and nucleus. I…
WBGene00015478	mapk-15	C05D10.2	HGNC:MAPK15|EnsEMBL-Compara;OrthoInspector;PhylomeDB;Hieranoid;Panther;Roundup;TreeFam;OrthoFinder;Inparanoid;OMA;ParaSite-Compara	Is an ortholog of human MAPK15 (mitogen-activated protein kinase 15). Is predicted to have MAP kinase activity. Is involved in dopamine uptake\; protein localization to ciliary transition zone\; and regulation of cilium assembly. Localizes to axoneme\; cell-cell junction\; and ciliary basal body. Is expressed in neurons\; oocyte\; and in male.
WBGene00002201	kin-18	T17E9.1	HGNC:TAOK3|OrthoInspector;EnsEMBL-Compara;PhylomeDB;Hieranoid;Panther;Inparanoid;OrthoFinder;OMA;ParaSite-Compara, HGNC:TAOK2|EnsEMBL-Compara;OrthoInspector;PhylomeDB;Hieranoid;Panther;OrthoFinder;Inparanoid;OMA;ParaSite-Compara, HGNC:TAOK1|OrthoInspector;PhylomeDB;Hieranoid;Panther;Roundup;OrthoFinder;Inparanoid;OMA, HGNC:SBK2|ParaSite-Compara, HGNC:SLK|ParaSite-Compara, HGNC:MAP2K3|ParaSite-Com…	Is an ortholog of human TAOK2 (TAO kinase 2) and Taok3. Is predicted to have MAP kinase kinase kinase activity. Is involved in several processes, including negative regulation of MAP kinase activity\; regulation of meiosis I\; and regulation of pharyngeal pumping. Localizes to cell cortex. Is expressed in several structures, including alimentary muscle\; excretory cell\; intestine\; nerve ring\; …
WBGene00018999	F57B9.8	F57B9.8	HGNC:FER|Panther;EnsEMBL-Compara;OrthoFinder;PhylomeDB, HGNC:FES|EnsEMBL-Compara;Panther;OrthoFinder;PhylomeDB	Is an ortholog of human FER (FER tyrosine kinase) and FES (FES proto-oncogene, tyrosine kinase). Is predicted to have non-membrane spanning protein tyrosine kinase activity and signaling receptor binding activity.
WBGene00017950	F31E3.2	F31E3.2	HGNC:PBX4|Hieranoid;OrthoInspector;Inparanoid;PhylomeDB, HGNC:PBX2|OrthoInspector;PhylomeDB;Hieranoid;Roundup;Inparanoid;Panther;OrthoFinder, HGNC:PBX1|Hieranoid;OrthoInspector;Inparanoid;PhylomeDB, HGNC:PBX3|OrthoInspector;PhylomeDB;Hieranoid;Roundup;Inparanoid;Panther;OrthoFinder, HGNC:RSKR|OrthoInspector;PhylomeDB;Panther;Roundup;TreeFam;Inparanoid;OrthoFinder;ParaSite-Compara	Is an ortholog of human RSKR (ribosomal protein S6 kinase related). Is predicted to have ATP binding activity and protein serine\/threonine kinase activity.
WBGene00020106	R151.1	R151.1	HGNC:STYK1|EnsEMBL-Compara;Panther, HGNC:KIT|ParaSite-Compara, HGNC:IGF1R|ParaSite-Compara, HGNC:NTRK2|ParaSite-Compara, HGNC:EPHA10|ParaSite-Compara, HGNC:TEK|ParaSite-Compara, HGNC:FLT4|ParaSite-Compara, HGNC:ERBB4|ParaSite-Compara, HGNC:DDR1|ParaSite-Compara, HGNC:INSRR|ParaSite-Compara, HGNC:KDR|ParaSite-Compara, HGNC:LMTK2|ParaSite-Compara, HGNC:EPHB2|ParaSite-Compara, HGNC:EPHB1|ParaSite-Co…	Is predicted to have protein tyrosine kinase activity. Human ortholog(s) of this gene are implicated in several diseases, including brain disease (multiple)\; gastrointestinal system cancer (multiple)\; and hematologic cancer (multiple).
WBGene00019459	K06H7.8	K06H7.8	N.A.	Is predicted to have protein serine\/threonine kinase activity.
WBGene00004042	plk-1	C14B9.4	HGNC:PLK1|EnsEMBL-Compara;OrthoInspector;PhylomeDB;Hieranoid;Panther;Roundup;TreeFam;OrthoFinder;Inparanoid;OMA, HGNC:PLK5|ParaSite-Compara	Is an ortholog of human PLK1 (polo like kinase 1). Exhibits protein kinase activity. Is involved in several processes, including meiotic nuclear division\; microtubule cytoskeleton organization\; and positive regulation of nematode male tail tip morphogenesis. Localizes to several cellular components, including condensed chromosome\; cytoskeleton\; and nucleus. Is expressed in AB and embryonic ce…
WBGene00022719	pdhk-2	ZK370.5	HGNC:PDK4|EnsEMBL-Compara;OrthoInspector;PhylomeDB;Hieranoid;Panther;Roundup;Inparanoid;OrthoFinder;OMA;ParaSite-Compara, HGNC:PDK2|OrthoInspector;EnsEMBL-Compara;PhylomeDB;Hieranoid;Panther;Roundup;Inparanoid;OrthoFinder;OMA;ParaSite-Compara, HGNC:PDK3|OrthoInspector;EnsEMBL-Compara;PhylomeDB;Hieranoid;Panther;Roundup;Inparanoid;OrthoFinder;OMA;ParaSite-Compara, HGNC:PDK1|EnsEMBL-Compara;OrthoIn…	Is an ortholog of several human genes including PDK1 (pyruvate dehydrogenase kinase 1)\; PDK3 (pyruvate dehydrogenase kinase 3)\; and PDK4 (pyruvate dehydrogenase kinase 4). Is predicted to have protein serine\/threonine kinase activity. Localizes to perinuclear region of cytoplasm. Is expressed in head neurons\; intestine\; pharynx\; and vulval muscle. Human ortholog(s) of this gene are implicat…
WBGene00019801	aak-1	PAR2.3	HGNC:PRKAA1|EnsEMBL-Compara;PhylomeDB;Panther;TreeFam;OrthoFinder;ParaSite-Compara, HGNC:PRKAA2|EnsEMBL-Compara;PhylomeDB;Panther;TreeFam;OrthoFinder;ParaSite-Compara, HGNC:TSSK2|ParaSite-Compara, HGNC:SIK3|ParaSite-Compara, HGNC:TSSK3|ParaSite-Compara, HGNC:SIK1B|ParaSite-Compara, HGNC:TSSK1B|ParaSite-Compara, HGNC:BRSK2|ParaSite-Compara, HGNC:NUAK1|ParaSite-Compara, HGNC:NUAK2|ParaSite-Compara,…	Is an ortholog of human PRKAA1 (protein kinase AMP-activated catalytic subunit alpha 1) and PRKAA2 (protein kinase AMP-activated catalytic subunit alpha 2). Is predicted to have protein serine\/threonine kinase activity. Is involved in negative regulation of cell population proliferation. Human ortholog(s) of this gene are implicated in early infantile epileptic encephalopathy 30.
WBGene00011299	ikke-1	R107.4	HGNC:IKBKE|EnsEMBL-Compara;OrthoInspector;OrthoFinder, HGNC:TBK1|EnsEMBL-Compara;OrthoInspector;OrthoFinder, HGNC:SBK3|ParaSite-Compara, HGNC:SBK1|ParaSite-Compara	Is an ortholog of human IKBKE (inhibitor of nuclear factor kappa B kinase subunit epsilon) and TBK1 (TANK binding kinase 1). Is predicted to have protein serine\/threonine kinase activity. Is involved in protein phosphorylation and regulation of autophagy. Localizes to cytoplasm. Is expressed in intestinal muscle.
WBGene00013978	ZK507.1	ZK507.1	N.A.	Is predicted to have protein serine\/threonine kinase activity.
WBGene00006579	tlk-1	C07A9.3	HGNC:TLK1|OrthoInspector;EnsEMBL-Compara;PhylomeDB;Panther;TreeFam;Inparanoid;OrthoFinder;ParaSite-Compara, HGNC:TLK2|OrthoInspector;EnsEMBL-Compara;PhylomeDB;Panther;Roundup;TreeFam;Inparanoid;OrthoFinder;ParaSite-Compara	Is an ortholog of human TLK2 (tousled like kinase 2). Exhibits protein serine\/threonine kinase activity. Is involved in positive regulation of protein kinase activity\; protein autophosphorylation\; and regulation of transcription by RNA polymerase II. Localizes to nuclear chromatin. Is expressed in germ line\; head\; posterior lateral ganglion\; somatic cell\; and somatic gonad.
WBGene00000405	cdk-1	T05G5.3	HGNC:CDK1|OrthoInspector;EnsEMBL-Compara;PhylomeDB;Hieranoid;Panther;Roundup;OrthoFinder;Inparanoid;OMA;ParaSite-Compara	Is an ortholog of human CDK1 (cyclin dependent kinase 1). Exhibits cyclin-dependent protein serine\/threonine kinase activity and protein kinase binding activity. Is involved in several processes, including cell division\; oocyte maturation\; and positive regulation of cellular protein metabolic process. Localizes to cytoplasm and nucleus. Is expressed in embryonic cell and germ cell.
WBGene00014012	riok-3	ZK632.3	HGNC:RIOK3|EnsEMBL-Compara;OrthoInspector;PhylomeDB;Hieranoid;Panther;Roundup;Inparanoid;OrthoFinder;ParaSite-Compara	Is an ortholog of human RIOK3 (RIO kinase 3). Is predicted to have protein serine\/threonine kinase activity. Is expressed in intestine.
WBGene00010838	M03C11.1	M03C11.1	HGNC:STK32A|OrthoInspector;EnsEMBL-Compara;PhylomeDB;Hieranoid;Panther;Roundup;TreeFam;Inparanoid;OrthoFinder;OMA;ParaSite-Compara, HGNC:STK32B|OrthoInspector;EnsEMBL-Compara;PhylomeDB;Hieranoid;Panther;Roundup;TreeFam;Inparanoid;OrthoFinder;OMA;ParaSite-Compara, HGNC:STK32C|EnsEMBL-Compara;OrthoInspector;PhylomeDB;Hieranoid;Panther;TreeFam;Inparanoid;OrthoFinder;OMA;ParaSite-Compara, HGNC:MAST1|…	Is an ortholog of human STK32A (serine\/threonine kinase 32A) and STK32B (serine\/threonine kinase 32B). Is predicted to have protein serine\/threonine kinase activity. Human ortholog(s) of this gene are implicated in mega-corpus-callosum syndrome with cerebellar hypoplasia and cortical malformations and myotonic dystrophy type 1.
WBGene00008423	D2045.5	D2045.5	N.A.	Is predicted to have protein serine\/threonine kinase activity.
WBGene00008424	D2045.7	D2045.7	HGNC:STK16|OrthoInspector;EnsEMBL-Compara;PhylomeDB;Hieranoid;Panther;Roundup;TreeFam;OrthoFinder;Inparanoid, HGNC:BMP2K|ParaSite-Compara, HGNC:AAK1|ParaSite-Compara	Is an ortholog of human STK16 (serine\/threonine kinase 16). Is predicted to have ATP binding activity and protein kinase activity.
WBGene00013132	strd-1	Y52D3.1	HGNC:STRADA|EnsEMBL-Compara;PhylomeDB;Hieranoid;Panther;OrthoFinder;OMA;ParaSite-Compara, HGNC:STRADB|Panther;EnsEMBL-Compara;OrthoFinder;PhylomeDB;Hieranoid;OMA, HGNC:SBK2|ParaSite-Compara, HGNC:SLK|ParaSite-Compara, HGNC:TAOK3|ParaSite-Compara, HGNC:MAP2K3|ParaSite-Compara, HGNC:MAP3K8|ParaSite-Compara, HGNC:MAP4K2|ParaSite-Compara, HGNC:OXSR1|ParaSite-Compara, HGNC:MAP2K6|ParaSite-Compara, HGN…	Is an ortholog of human STRADA (STE20 related adaptor alpha). Exhibits protein kinase binding activity and protein serine\/threonine kinase activator activity. Is involved in several processes, including asymmetric neuroblast division\; maintenance of dauer\; and positive regulation of peptidyl-threonine phosphorylation. Localizes to several cellular components, including cell body\; cell cortex\…
WBGene00000407	cdk-5	T27E9.3	HGNC:CDK5|OrthoInspector;EnsEMBL-Compara;PhylomeDB;Hieranoid;Panther;Roundup;TreeFam;Inparanoid;OrthoFinder;OMA	Is an ortholog of human CDK5 (cyclin dependent kinase 5). Exhibits protein kinase activity. Is involved in several processes, including regulation of dense core granule transport\; regulation of neuron remodeling\; and regulation of synapse organization. Localizes to axon and synapse.
WBGene00003048	lit-1	W06F12.1	HGNC:NLK|EnsEMBL-Compara;OrthoInspector;PhylomeDB;Hieranoid;Panther;Roundup;TreeFam;Inparanoid;OMA;OrthoFinder;ParaSite-Compara, HGNC:MAPK4|ParaSite-Compara	Is an ortholog of human NLK (nemo like kinase). Exhibits beta-catenin binding activity\; protein N-terminus binding activity\; and protein serine\/threonine kinase activity. Is involved in several processes, including asymmetric protein localization involved in cell fate determination\; cell fate specification\; and cellular protein modification process. Localizes to cell cortex\; nucleus\; and s…
WBGene00012307	W06F12.3	W06F12.3	N.A.	Is predicted to have protein serine\/threonine kinase activity.
WBGene00000897	daf-1	F29C4.1	HGNC:ACVR1C|Roundup;OrthoInspector;Inparanoid;EnsEMBL-Compara;ParaSite-Compara, HGNC:TGFBR1|Inparanoid;OrthoInspector;Roundup;EnsEMBL-Compara, HGNC:ACVR1|OrthoInspector;EnsEMBL-Compara;Inparanoid;ParaSite-Compara, HGNC:ACVRL1|OrthoInspector;EnsEMBL-Compara;Inparanoid;ParaSite-Compara, HGNC:BMPR2|ParaSite-Compara, HGNC:ACVR1B|ParaSite-Compara, HGNC:ACVR2B|ParaSite-Compara, HGNC:BMPR1A|ParaSite-Com…	Is an ortholog of human ACVR1C (activin A receptor type 1C). Is predicted to have SMAD binding activity and transforming growth factor beta receptor activity, type I. Is involved in several processes, including dauer entry\; larval feeding behavior\; and response to bacterium. Is expressed in several structures, including distal tip cell\; head ganglion\; inner labial sensillum\; neurons\; and so…
WBGene00017577	F18F11.4	F18F11.4	N.A.	Is predicted to have transferase activity, transferring glycosyl groups.
WBGene00002187	kgb-1	T07A9.3	HGNC:MAPK10|TreeFam;Panther;OrthoFinder;EnsEMBL-Compara, HGNC:MAPK9|EnsEMBL-Compara;TreeFam;Panther, HGNC:MAPK8|EnsEMBL-Compara;TreeFam;Panther, HGNC:SRPK2|ParaSite-Compara, HGNC:MAPK13|ParaSite-Compara, HGNC:MAPK6|ParaSite-Compara, HGNC:MAPK4|ParaSite-Compara, HGNC:NLK|ParaSite-Compara, HGNC:MAPK14|ParaSite-Compara, HGNC:ICK|ParaSite-Compara, HGNC:MAPK12|ParaSite-Compara	Is an ortholog of human MAPK10 (mitogen-activated protein kinase 10). Exhibits several functions, including DEAD\/H-box RNA helicase binding activity\; JUN kinase activity\; and RNA polymerase II repressing transcription factor binding activity. Is involved in several processes, including gamete generation\; negative regulation of RNA polymerase II regulatory region sequence-specific DNA binding …
WBGene00021012	pig-1	W03G1.6	HGNC:MELK|EnsEMBL-Compara;OrthoInspector;PhylomeDB;Hieranoid;Panther;Roundup;TreeFam;Inparanoid;OrthoFinder;ParaSite-Compara	Is an ortholog of human MELK (maternal embryonic leucine zipper kinase). Is predicted to have non-membrane spanning protein tyrosine kinase activity and protein serine\/threonine kinase activity. Is involved in several processes, including generation of neurons\; hemidesmosome assembly\; and regulation of apoptotic process. Localizes to centrosome and cytoplasm. Is expressed in several structures…
WBGene00015994	C18H7.4	C18H7.4	HGNC:FER|Panther;OrthoFinder;PhylomeDB, HGNC:FES|Panther;OrthoFinder;PhylomeDB	Is an ortholog of human FER (FER tyrosine kinase) and FES (FES proto-oncogene, tyrosine kinase). Is predicted to have non-membrane spanning protein tyrosine kinase activity and signaling receptor binding activity.
WBGene00019665	K11H12.9	K11H12.9	HGNC:SRPK2|ParaSite-Compara, HGNC:ICK|ParaSite-Compara, HGNC:MAPK4|ParaSite-Compara, HGNC:MAPK13|ParaSite-Compara, HGNC:NLK|ParaSite-Compara, HGNC:MAPK9|ParaSite-Compara, HGNC:MAPK12|ParaSite-Compara, HGNC:MAPK14|ParaSite-Compara, HGNC:MAPK6|ParaSite-Compara	Is predicted to have ATP binding activity and protein kinase activity. Human ortholog(s) of this gene are implicated in endocrine-cerebro-osteodysplasia syndrome and juvenile myoclonic epilepsy 10.
WBGene00007007	mak-2	C44C8.6	HGNC:MAPKAPK3|EnsEMBL-Compara;OrthoInspector;PhylomeDB;Hieranoid;Panther;Roundup;TreeFam;Inparanoid;OrthoFinder;OMA, HGNC:MAPKAPK2|EnsEMBL-Compara;OrthoInspector;PhylomeDB;Hieranoid;Panther;Roundup;TreeFam;Inparanoid;OrthoFinder;OMA, HGNC:DCX|ParaSite-Compara	Is an ortholog of human MAPKAPK2 (MAPK activated protein kinase 2) and MAPKAPK3 (MAPK activated protein kinase 3). Exhibits mitogen-activated protein kinase binding activity. Is involved in behavioral response to nicotine\; positive regulation of 3'-UTR-mediated mRNA stabilization\; and regulation of nervous system development. Localizes to cytoplasm\; nucleus\; and synapse. Is expressed in body …
WBGene00000553	cmk-1	K07A9.2	HGNC:CAMK1G|EnsEMBL-Compara;OrthoInspector;PhylomeDB;Hieranoid;Panther;Roundup;TreeFam;OrthoFinder, HGNC:CAMK1|OrthoInspector;EnsEMBL-Compara;PhylomeDB;Hieranoid;Panther;Roundup;TreeFam;Inparanoid;OrthoFinder;OMA;ParaSite-Compara, HGNC:CAMK1D|OrthoInspector;EnsEMBL-Compara;PhylomeDB;Hieranoid;Panther;Roundup;TreeFam;Inparanoid;OrthoFinder;OMA, HGNC:PNCK|EnsEMBL-Compara;OrthoInspector;PhylomeDB;Hi…	Is an ortholog of human CAMK1 (calcium\/calmodulin dependent protein kinase I). Exhibits calmodulin binding activity and calmodulin-dependent protein kinase activity. Is involved in several processes, including generation of neurons\; regulation of transcription, DNA-templated\; and thermosensory behavior. Localizes to cytoplasm and nucleus. Is expressed in neurons and vulval muscle.
WBGene00001548	gcy-23	T26C12.4	N.A.	Is predicted to have guanylate cyclase activity and peptide receptor activity. Is involved in detection of temperature stimulus\; thermosensory behavior\; and thermotaxis. Localizes to neuron projection terminus. Is expressed in AFDL and AFDR.
WBGene00002188	kgb-2	ZC416.4	HGNC:MAPK10|TreeFam;Panther;OrthoFinder;EnsEMBL-Compara, HGNC:MAPK9|Panther;TreeFam;EnsEMBL-Compara, HGNC:MAPK8|Panther;TreeFam;EnsEMBL-Compara, HGNC:SRPK2|ParaSite-Compara, HGNC:MAPK13|ParaSite-Compara, HGNC:ICK|ParaSite-Compara, HGNC:MAPK4|ParaSite-Compara, HGNC:NLK|ParaSite-Compara, HGNC:MAPK12|ParaSite-Compara, HGNC:MAPK14|ParaSite-Compara, HGNC:MAPK6|ParaSite-Compara	Is an ortholog of human MAPK10 (mitogen-activated protein kinase 10). Is predicted to have JUN kinase activity. Human ortholog(s) of this gene are implicated in endocrine-cerebro-osteodysplasia syndrome and juvenile myoclonic epilepsy 10.
WBGene00020678	T22B11.4	T22B11.4	N.A.	Is predicted to have transmembrane receptor protein tyrosine kinase activity. Is expressed in pharyngeal gland cell.
WBGene00020003	R11E3.1	R11E3.1	HGNC:FER|Hieranoid;Panther;Inparanoid;PhylomeDB;OrthoFinder, HGNC:FES|Hieranoid;Panther;Inparanoid;PhylomeDB;OrthoFinder	Is an ortholog of human FER (FER tyrosine kinase) and FES (FES proto-oncogene, tyrosine kinase). Is predicted to have non-membrane spanning protein tyrosine kinase activity and signaling receptor binding activity.
WBGene00020071	R13H9.5	R13H9.5	N.A.	Is predicted to have protein serine\/threonine kinase activity.
WBGene00020072	R13H9.6	R13H9.6	N.A.	Is predicted to have protein serine\/threonine kinase activity.
WBGene00020992	W03F8.2	W03F8.2	N.A.	Is enriched in neurons\; retrovesicular ganglion\; and in male based on RNA-seq and microarray studies. Is affected by several genes including daf-2\; hsf-1\; and clk-1 based on microarray\; tiling array\; and RNA-seq studies. Is affected by eight chemicals including Rotenone\; Tunicamycin\; and allantoin based on RNA-seq and microarray studies.
WBGene00018122	ttbk-2	F36H12.8	HGNC:TTBK1|Roundup;Panther;OrthoFinder;EnsEMBL-Compara, HGNC:TTBK2|Panther;Roundup;OrthoFinder;EnsEMBL-Compara	Is an ortholog of human TTBK1 (tau tubulin kinase 1) and TTBK2 (tau tubulin kinase 2). Is predicted to have protein serine\/threonine kinase activity.
WBGene00018123	F36H12.9	F36H12.9	N.A.	Is predicted to have protein serine\/threonine kinase activity.
WBGene00022705	ZK354.2	ZK354.2	N.A.	Is predicted to have protein serine\/threonine kinase activity.
WBGene00020435	T11F8.4	T11F8.4	N.A.	Is predicted to have protein serine\/threonine kinase activity.
WBGene00016541	C39H7.1	C39H7.1	HGNC:TTBK2|Panther;Roundup;OrthoFinder;EnsEMBL-Compara, HGNC:TTBK1|Panther;Roundup;OrthoFinder;EnsEMBL-Compara	Is an ortholog of human TTBK1 (tau tubulin kinase 1) and TTBK2 (tau tubulin kinase 2). Is predicted to have protein serine\/threonine kinase activity.
WBGene00016954	C55C3.4	C55C3.4	HGNC:FER|Panther;EnsEMBL-Compara;OrthoFinder;PhylomeDB, HGNC:FES|Panther;EnsEMBL-Compara;OrthoFinder;PhylomeDB	Is an ortholog of human FER (FER tyrosine kinase) and FES (FES proto-oncogene, tyrosine kinase). Is predicted to have non-membrane spanning protein tyrosine kinase activity and signaling receptor binding activity.
WBGene00019517	K08B4.5	K08B4.5	N.A.	Is affected by several genes including clk-1\; eat-2\; and pgl-1 based on microarray and RNA-seq studies. Is affected by six chemicals including Psoralens\; allantoin\; and metformin based on RNA-seq and microarray studies.
WBGene00016085	C25A8.5	C25A8.5	HGNC:FER|EnsEMBL-Compara;Panther;OrthoFinder;PhylomeDB, HGNC:FES|EnsEMBL-Compara;Panther;OrthoFinder;PhylomeDB	Is an ortholog of human FER (FER tyrosine kinase) and FES (FES proto-oncogene, tyrosine kinase). Is predicted to have non-membrane spanning protein tyrosine kinase activity and signaling receptor binding activity.
WBGene00017050	D2024.1	D2024.1	N.A.	Is predicted to have protein serine\/threonine kinase activity.
WBGene00006814	unc-82	B0496.3	HGNC:NUAK1|EnsEMBL-Compara;OrthoInspector;Panther;Roundup, HGNC:NUAK2|Roundup;Panther;OrthoInspector;EnsEMBL-Compara	Is an ortholog of human NUAK1 (NUAK family kinase 1) and NUAK2 (NUAK family kinase 2). Is a structural constituent of muscle. Is involved in striated muscle myosin thick filament assembly and striated muscle paramyosin thick filament assembly. Localizes to M band. Is expressed in body wall musculature.
WBGene00004044	plk-3	F55G1.8	HGNC:PLK1|EnsEMBL-Compara;Panther;OrthoFinder;PhylomeDB, HGNC:PLK5|ParaSite-Compara	Is an ortholog of human PLK1 (polo like kinase 1). Is predicted to have protein serine\/threonine kinase activity.
WBGene00020289	T06C10.3	T06C10.3	HGNC:FES|Hieranoid;Panther;Inparanoid;PhylomeDB;EnsEMBL-Compara;OrthoFinder, HGNC:FER|Hieranoid;Panther;Inparanoid;PhylomeDB;EnsEMBL-Compara;OrthoFinder	Is an ortholog of human FER (FER tyrosine kinase) and FES (FES proto-oncogene, tyrosine kinase). Is predicted to have non-membrane spanning protein tyrosine kinase activity and signaling receptor binding activity.
WBGene00002208	kin-26	T06C10.6	HGNC:FER|Panther;EnsEMBL-Compara;OrthoFinder;PhylomeDB, HGNC:FES|Panther;EnsEMBL-Compara;OrthoFinder;PhylomeDB	Is an ortholog of human FER (FER tyrosine kinase) and FES (FES proto-oncogene, tyrosine kinase). Is predicted to have non-membrane spanning protein tyrosine kinase activity and signaling receptor binding activity.
WBGene00001535	gcy-8	C49H3.1	N.A.	Exhibits guanylate cyclase activity. Is involved in several processes, including microvillus organization\; thermosensory behavior\; and thermotaxis. Localizes to microvillus membrane and neuron projection terminus. Is expressed in AFDL and AFDR.
WBGene00004056	pmk-2	F42G8.3	HGNC:MAPK14|Panther;EnsEMBL-Compara;OrthoFinder;PhylomeDB, HGNC:MAPK12|EnsEMBL-Compara;Panther;OrthoFinder;PhylomeDB;ParaSite-Compara, HGNC:MAPK13|Panther;EnsEMBL-Compara;OrthoFinder;PhylomeDB, HGNC:MAPK11|EnsEMBL-Compara;Panther;OrthoFinder;PhylomeDB, HGNC:ICK|ParaSite-Compara, HGNC:MAPK4|ParaSite-Compara, HGNC:NLK|ParaSite-Compara, HGNC:MAPK6|ParaSite-Compara, HGNC:SRPK2|ParaSite-Compara	Is an ortholog of human MAPK12 (mitogen-activated protein kinase 12). Exhibits MAP kinase activity. Is involved in intracellular signal transduction and response to osmotic stress. Localizes to cytoplasm. Is expressed in ganglia\; gonad\; intestine\; and nerve ring. Human ortholog(s) of this gene are implicated in endocrine-cerebro-osteodysplasia syndrome and juvenile myoclonic epilepsy 10.
WBGene00004057	pmk-3	F42G8.4	HGNC:SRPK2|ParaSite-Compara, HGNC:ICK|ParaSite-Compara, HGNC:MAPK4|ParaSite-Compara, HGNC:NLK|ParaSite-Compara, HGNC:MAPK14|ParaSite-Compara, HGNC:MAPK6|ParaSite-Compara, HGNC:MAPK12|ParaSite-Compara	Exhibits protein kinase binding activity\; protein phosphatase binding activity\; and protein serine\/threonine kinase activity. Is involved in several processes, including behavioral response to nicotine\; generation of neurons\; and p38MAPK cascade. Localizes to cytoplasm and nucleus. Is expressed in several structures, including amphid neurons\; gonad\; and intestine. Human ortholog(s) of this…
WBGene00015049	B0218.5	B0218.5	N.A.	Is predicted to have protein serine\/threonine kinase activity.
WBGene00003961	pct-1	C07G1.3	HGNC:CDK17|EnsEMBL-Compara;OrthoInspector;PhylomeDB;Hieranoid;Panther;Roundup;TreeFam;Inparanoid;OMA;OrthoFinder, HGNC:CDK16|EnsEMBL-Compara;OrthoInspector;PhylomeDB;Hieranoid;Panther;Roundup;TreeFam;Inparanoid;OMA;OrthoFinder;ParaSite-Compara, HGNC:CDK18|OrthoInspector;EnsEMBL-Compara;PhylomeDB;Hieranoid;Panther;Roundup;TreeFam;Inparanoid;OrthoFinder	Is an ortholog of human CDK16 (cyclin dependent kinase 16). Is predicted to have protein serine\/threonine kinase activity. Localizes to axon and dendrite.
WBGene00015650	pkg-2	C09G4.2	HGNC:PRKG1|EnsEMBL-Compara;Panther;OrthoFinder;PhylomeDB;OMA;ParaSite-Compara, HGNC:PRKACG|ParaSite-Compara, HGNC:PRKG2|ParaSite-Compara	Is an ortholog of human PRKG1 (protein kinase cGMP-dependent 1). Is predicted to have ATP binding activity and cGMP-dependent protein kinase activity. Human ortholog(s) of this gene are implicated in platelet-type bleeding disorder 19 and thoracic aortic aneurysm.
WBGene00016765	C49C8.1	C49C8.1	N.A.	Is predicted to have protein serine\/threonine kinase activity.
WBGene00006941	wnk-1	C46C2.1	HGNC:WNK1|OrthoInspector;Panther;Roundup;TreeFam;Inparanoid;EnsEMBL-Compara, HGNC:WNK2|Panther;TreeFam;OrthoInspector;Inparanoid;Hieranoid, HGNC:WNK4|OrthoInspector;PhylomeDB;Panther;TreeFam;Inparanoid;EnsEMBL-Compara;OrthoFinder;ParaSite-Compara, HGNC:WNK3|OrthoInspector;Panther;Roundup;TreeFam;Inparanoid;Hieranoid;ParaSite-Compara, HGNC:NRBP2|ParaSite-Compara	Is an ortholog of human WNK4 (WNK lysine deficient protein kinase 4). Is predicted to have chloride channel inhibitor activity\; potassium channel inhibitor activity\; and protein serine\/threonine kinase activity. Is involved in multicellular organismal water homeostasis\; negative regulation of transcription by RNA polymerase II\; and positive regulation of transcription from RNA polymerase II …
WBGene00002204	kin-21	W08D2.8	HGNC:FES|TreeFam;Panther;PhylomeDB;EnsEMBL-Compara;OrthoFinder, HGNC:FER|TreeFam;Panther;PhylomeDB;EnsEMBL-Compara;OrthoFinder	Is an ortholog of human FER (FER tyrosine kinase) and FES (FES proto-oncogene, tyrosine kinase). Is predicted to have ATP binding activity and non-membrane spanning protein tyrosine kinase activity.
WBGene00002206	kin-24	K07F5.4	HGNC:FER|TreeFam;Panther;PhylomeDB;EnsEMBL-Compara;OrthoFinder, HGNC:FES|TreeFam;Panther;PhylomeDB;EnsEMBL-Compara;OrthoFinder	Is an ortholog of human FER (FER tyrosine kinase) and FES (FES proto-oncogene, tyrosine kinase). Is predicted to have non-membrane spanning protein tyrosine kinase activity and signaling receptor binding activity.
WBGene00009324	ttbk-3	F32B6.10	N.A.	Is predicted to have protein serine\/threonine kinase activity. Is expressed in neurons.
WBGene00002193	kin-5	T13H10.1	HGNC:FES|Hieranoid;Panther;PhylomeDB;OrthoFinder, HGNC:FER|Hieranoid;Panther;PhylomeDB;OrthoFinder	Is an ortholog of human FER (FER tyrosine kinase) and FES (FES proto-oncogene, tyrosine kinase). Is predicted to have non-membrane spanning protein tyrosine kinase activity and signaling receptor binding activity.
WBGene00001487	frk-1	T04B2.2	HGNC:FER|Panther;Roundup;PhylomeDB;EnsEMBL-Compara;OrthoInspector;OrthoFinder, HGNC:FES|Panther;Roundup;PhylomeDB;OrthoInspector;EnsEMBL-Compara;OrthoFinder	Is an ortholog of human FER (FER tyrosine kinase) and FES (FES proto-oncogene, tyrosine kinase). Exhibits beta-catenin binding activity and protein kinase activity. Is involved in several processes, including embryonic body morphogenesis\; protein autophosphorylation\; and regulation of epidermal cell differentiation. Localizes to several cellular components, including cell-cell junction\; nucleu…
WBGene00012169	ttbk-4	W01B6.2	N.A.	Is predicted to have protein serine\/threonine kinase activity. Is expressed in ASIL\; ASIR\; amphid neurons\; and neurons.
WBGene00012172	W01B6.5	W01B6.5	HGNC:FES|Hieranoid;Panther;Inparanoid;PhylomeDB;EnsEMBL-Compara;OrthoFinder, HGNC:FER|Hieranoid;Panther;Inparanoid;PhylomeDB;EnsEMBL-Compara;OrthoFinder	Is an ortholog of human FER (FER tyrosine kinase) and FES (FES proto-oncogene, tyrosine kinase). Is predicted to have non-membrane spanning protein tyrosine kinase activity and signaling receptor binding activity.
WBGene00007305	ttbk-5	C04G2.2	N.A.	Is predicted to have protein serine\/threonine kinase activity. Is expressed in ASIL\; ASIR\; amphid neurons\; and neurons.
WBGene00007309	C04G2.10	C04G2.10	HGNC:HASPIN|Panther;OrthoFinder;PhylomeDB	Is an ortholog of human HASPIN (histone H3 associated protein kinase). Is predicted to have histone kinase activity (H3-T3 specific).
WBGene00003402	mpk-2	C04G6.1	HGNC:MAPK7|EnsEMBL-Compara;OrthoInspector;Hieranoid;Panther;OrthoFinder;ParaSite-Compara	Is an ortholog of human MAPK7 (mitogen-activated protein kinase 7). Is predicted to have ATP binding activity and MAP kinase activity.
WBGene00006779	unc-43	K11E8.1	HGNC:CAMK2B|EnsEMBL-Compara;PhylomeDB;Hieranoid;Panther;Roundup;TreeFam;OrthoFinder;Inparanoid;OMA;OrthoInspector, HGNC:CAMK2G|EnsEMBL-Compara;OrthoInspector;PhylomeDB;Hieranoid;Panther;TreeFam;OrthoFinder;OMA, HGNC:CAMK2A|OrthoInspector;EnsEMBL-Compara;PhylomeDB;Hieranoid;Panther;TreeFam;Inparanoid;OrthoFinder, HGNC:CAMK2D|EnsEMBL-Compara;OrthoInspector;PhylomeDB;Hieranoid;Panther;Roundup;TreeFa…	Is an ortholog of human CAMK2B (calcium\/calmodulin dependent protein kinase II beta) and CAMK2D (calcium\/calmodulin dependent protein kinase II delta). Exhibits identical protein binding activity\; ion channel binding activity\; and kinase activity. Is involved in cellular protein modification process\; medium-term memory\; and positive regulation of gene expression. Localizes to axon cytoplasm…
WBGene00012785	Y43C5B.2	Y43C5B.2	HGNC:FER|EnsEMBL-Compara;Panther;OrthoFinder, HGNC:FES|Panther;EnsEMBL-Compara;OrthoFinder	Is an ortholog of human FER (FER tyrosine kinase) and FES (FES proto-oncogene, tyrosine kinase). Is predicted to have non-membrane spanning protein tyrosine kinase activity and signaling receptor binding activity.
WBGene00008487	F01D4.3	F01D4.3	N.A.	Is enriched in AVK\; FLP\; germ line\; and in male based on microarray and RNA-seq studies. Is affected by several genes including clk-1\; eat-2\; and npr-1 based on microarray and RNA-seq studies. Is affected by four chemicals including hydrogen sulfide\; methylmercuric chloride\; and Hydrolyzable Tannins based on microarray studies.
WBGene00012010	T25B9.4	T25B9.4	HGNC:FES|Panther;Inparanoid;PhylomeDB;OrthoFinder, HGNC:FER|Panther;Inparanoid;PhylomeDB;OrthoFinder	Is an ortholog of human FER (FER tyrosine kinase) and FES (FES proto-oncogene, tyrosine kinase). Is predicted to have non-membrane spanning protein tyrosine kinase activity and signaling receptor binding activity.
WBGene00012011	T25B9.5	T25B9.5	HGNC:FER|TreeFam;Panther;PhylomeDB;EnsEMBL-Compara;OrthoFinder, HGNC:FES|TreeFam;Panther;PhylomeDB;EnsEMBL-Compara;OrthoFinder	Is an ortholog of human FER (FER tyrosine kinase) and FES (FES proto-oncogene, tyrosine kinase). Is predicted to have ATP binding activity and non-membrane spanning protein tyrosine kinase activity.
WBGene00014005	ZK593.9	ZK593.9	N.A.	Is affected by several genes including daf-2\; daf-12\; and clk-1 based on tiling array\; microarray\; and RNA-seq studies. Is affected by four chemicals including methylmercuric chloride\; Sodium Chloride\; and Rifampin based on microarray and RNA-seq studies.
WBGene00013475	Y69E1A.3	Y69E1A.3	HGNC:FES|TreeFam;Panther;PhylomeDB;EnsEMBL-Compara;OrthoFinder, HGNC:FER|TreeFam;Panther;PhylomeDB;EnsEMBL-Compara;OrthoFinder	Is an ortholog of human FER (FER tyrosine kinase) and FES (FES proto-oncogene, tyrosine kinase). Is predicted to have ATP binding activity and non-membrane spanning protein tyrosine kinase activity.
WBGene00010883	M7.7	M7.7	N.A.	Is predicted to have protein serine\/threonine kinase activity.
WBGene00007448	C08F8.6	C08F8.6	N.A.	Is predicted to have protein serine\/threonine kinase activity.
WBGene00007335	C05C12.1	C05C12.1	N.A.	Is predicted to have protein serine\/threonine kinase activity.
WBGene00009039	F22B3.8	F22B3.8	HGNC:FER|Panther;OrthoFinder;PhylomeDB, HGNC:FES|Panther;OrthoFinder;PhylomeDB	Is an ortholog of human FER (FER tyrosine kinase) and FES (FES proto-oncogene, tyrosine kinase). Is predicted to have non-membrane spanning protein tyrosine kinase activity and signaling receptor binding activity.
WBGene00002192	kin-4	C10C6.1	HGNC:MAST1|Roundup;TreeFam;OrthoInspector;Inparanoid;EnsEMBL-Compara;Hieranoid;Panther;OrthoFinder;ParaSite-Compara, HGNC:MAST3|OrthoInspector;Panther;Inparanoid;TreeFam;EnsEMBL-Compara;Hieranoid;OrthoFinder;ParaSite-Compara, HGNC:MAST2|TreeFam;OrthoInspector;Inparanoid;EnsEMBL-Compara;Hieranoid;Panther;OrthoFinder;ParaSite-Compara, HGNC:MAST4|OrthoInspector;Panther;Roundup;TreeFam;Inparanoid;Ens…	Is an ortholog of human MAST1 and MAST4 (microtubule associated serine\/threonine kinase family member 4). Is predicted to have protein serine\/threonine kinase activity. Is expressed in head neurons\; intestine\; and tail neurons. Human ortholog(s) of this gene are implicated in mega-corpus-callosum syndrome with cerebellar hypoplasia and cortical malformations.
WBGene00010349	dyf-18	H01G02.2	HGNC:CDK20|TreeFam;OrthoFinder;EnsEMBL-Compara, HGNC:CDKL3|EnsEMBL-Compara;Panther;ParaSite-Compara, HGNC:CDKL2|Panther;EnsEMBL-Compara;ParaSite-Compara, HGNC:CDKL4|ParaSite-Compara, HGNC:CDK4|ParaSite-Compara, HGNC:CDK6|ParaSite-Compara, HGNC:CDKL5|ParaSite-Compara, HGNC:CDK14|ParaSite-Compara, HGNC:CDK15|ParaSite-Compara, HGNC:CDK8|ParaSite-Compara, HGNC:CDK13|ParaSite-Compara, HGNC:CDK19|ParaS…	Is an ortholog of human CDK20 (cyclin dependent kinase 20)\; CDKL2 (cyclin dependent kinase like 2)\; and CDKL3 (cyclin dependent kinase like 3). Is predicted to have cyclin-dependent protein serine\/threonine kinase activity. Is expressed in amphid neurons\; head\; inner labial neurons\; outer labial neurons\; and phasmid neurons. Human ortholog(s) of this gene are implicated in early infantile …
WBGene00006759	unc-22	ZK617.1	HGNC:TTN|OrthoInspector;PhylomeDB;Hieranoid;Panther;Roundup, HGNC:MYOT|ParaSite-Compara, HGNC:MYPN|ParaSite-Compara, HGNC:ALPK3|ParaSite-Compara, HGNC:IGFN1|ParaSite-Compara, HGNC:SPEG|ParaSite-Compara, HGNC:PALLD|ParaSite-Compara, HGNC:OBSCN|ParaSite-Compara	Is an ortholog of human TTN (titin). Exhibits protein kinase binding activity and protein serine\/threonine kinase activity. Is involved in several processes, including behavioral response to nicotine\; cellular protein modification process\; and positive regulation of sarcomere organization. Localizes to A band. Is expressed in body wall musculature\; pharyngeal muscle cell\; and vulval muscle. …
WBGene00001543	gcy-18	ZK896.8	N.A.	Is predicted to have guanylate cyclase activity and peptide receptor activity. Is involved in detection of temperature stimulus\; thermosensory behavior\; and thermotaxis. Localizes to microvillus membrane and neuron projection terminus. Is expressed in intestine and nervous system.
WBGene00003150	mbk-2	F49E11.1	HGNC:DYRK3|OrthoInspector;EnsEMBL-Compara;PhylomeDB;Panther;Roundup;TreeFam;Inparanoid;Hieranoid;OrthoFinder;ParaSite-Compara, HGNC:DYRK2|EnsEMBL-Compara;OrthoInspector;PhylomeDB;Panther;Roundup;TreeFam;Inparanoid;Hieranoid;OrthoFinder, HGNC:CLK4|ParaSite-Compara, HGNC:HIPK4|ParaSite-Compara	Is an ortholog of human DYRK3 (dual specificity tyrosine phosphorylation regulated kinase 3). Exhibits protein serine\/threonine kinase activity and protein tyrosine kinase activity. Is involved in several processes, including P granule disassembly\; asymmetric protein localization involved in cell fate determination\; and cellular protein modification process. Localizes to several cellular compo…
WBGene00004029	pik-1	K09B11.1	HGNC:IRAK2|Hieranoid;EnsEMBL-Compara;PhylomeDB;Panther;ParaSite-Compara, HGNC:HLA-DPA1|EnsEMBL-Compara;OrthoInspector;Roundup;TreeFam;OrthoFinder;Inparanoid, HGNC:IRAK1|Hieranoid;OrthoInspector;Roundup;PhylomeDB;EnsEMBL-Compara;Panther;ParaSite-Compara, HGNC:IRAK3|ParaSite-Compara	Is an ortholog of human IRAK1 (interleukin 1 receptor associated kinase 1). Is predicted to have protein serine\/threonine kinase activity. Is expressed in RMGL\; RMGR\; and nervous system.
WBGene00010712	K09B11.5	K09B11.5	HGNC:FES|TreeFam;Panther;PhylomeDB;EnsEMBL-Compara;OrthoFinder, HGNC:FER|TreeFam;Panther;PhylomeDB;EnsEMBL-Compara;OrthoFinder	Is an ortholog of human FER (FER tyrosine kinase) and FES (FES proto-oncogene, tyrosine kinase). Is predicted to have ATP binding activity and non-membrane spanning protein tyrosine kinase activity.
WBGene00012637	Y38H8A.3	Y38H8A.3	HGNC:TTBK2|Roundup;Panther;OrthoFinder;EnsEMBL-Compara, HGNC:TTBK1|Roundup;Panther;OrthoFinder;EnsEMBL-Compara	Is an ortholog of human TTBK1 (tau tubulin kinase 1) and TTBK2 (tau tubulin kinase 2). Is predicted to have protein serine\/threonine kinase activity.
WBGene00013801	Y116A8C.24	Y116A8C.24	HGNC:FER|EnsEMBL-Compara;OrthoFinder;PhylomeDB, HGNC:FES|EnsEMBL-Compara;OrthoFinder;PhylomeDB	Is an ortholog of human FER (FER tyrosine kinase) and FES (FES proto-oncogene, tyrosine kinase). Is predicted to have ATP binding activity and non-membrane spanning protein tyrosine kinase activity.
WBGene00008192	C49C3.2	C49C3.2	N.A.	Is affected by several genes including daf-2\; clk-1\; and eat-2 based on tiling array\; RNA-seq\; and microarray studies. Is affected by eight chemicals including manganese chloride\; Psoralens\; and allantoin based on RNA-seq and microarray studies.
WBGene00008200	C49C3.10	C49C3.10	HGNC:SRPK1|ParaSite-Compara, HGNC:SRPK2|ParaSite-Compara, HGNC:MAPK4|ParaSite-Compara, HGNC:NLK|ParaSite-Compara, HGNC:MAPK9|ParaSite-Compara, HGNC:MAPK6|ParaSite-Compara	Is predicted to have ATP binding activity and protein kinase activity.
WBGene00001550	gcy-27	C06A12.4	HGNC:GUCY2F|Panther;TreeFam;EnsEMBL-Compara, HGNC:GUCY2D|EnsEMBL-Compara;TreeFam;Panther	Is an ortholog of human GUCY2D (guanylate cyclase 2D, retinal) and GUCY2F (guanylate cyclase 2F, retinal). Is predicted to have guanylate cyclase activity and peptide receptor activity. Is involved in chemosensory behavior and sensory perception of bitter taste. Is expressed in amphid neurons.
WBGene00008711	F11E6.8	F11E6.8	HGNC:MET|OrthoInspector;EnsEMBL-Compara;Roundup;Panther;OrthoFinder;ParaSite-Compara, HGNC:MST1R|Panther;OrthoInspector;EnsEMBL-Compara;OrthoFinder;ParaSite-Compara, HGNC:KIT|ParaSite-Compara, HGNC:AXL|ParaSite-Compara, HGNC:NTRK2|ParaSite-Compara, HGNC:EPHA10|ParaSite-Compara, HGNC:TEK|ParaSite-Compara, HGNC:EPHB4|ParaSite-Compara, HGNC:FLT4|ParaSite-Compara, HGNC:ERBB4|ParaSite-Compara, HGNC:DD…	Is an ortholog of human MET (MET proto-oncogene, receptor tyrosine kinase). Is predicted to have transmembrane receptor protein tyrosine kinase activity. Human ortholog(s) of this gene are implicated in several diseases, including bone development disease (multiple)\; gastrointestinal system cancer (multiple)\; and hematologic cancer (multiple).
WBGene00017083	kin-33	DC2.7	HGNC:CHEK1|TreeFam;Panther;OrthoFinder;PhylomeDB, HGNC:TSSK2|ParaSite-Compara, HGNC:BRSK1|ParaSite-Compara, HGNC:TSSK3|ParaSite-Compara, HGNC:BRSK2|ParaSite-Compara, HGNC:HUNK|ParaSite-Compara, HGNC:NUAK1|ParaSite-Compara, HGNC:TSSK6|ParaSite-Compara, HGNC:NUAK2|ParaSite-Compara	Is an ortholog of human CHEK1 (checkpoint kinase 1). Is predicted to have protein serine\/threonine kinase activity.
WBGene00019814	R02C2.1	R02C2.1	HGNC:CAMKV|ParaSite-Compara, HGNC:PNCK|ParaSite-Compara, HGNC:MYLK2|ParaSite-Compara, HGNC:CAMK1G|ParaSite-Compara, HGNC:DCLK2|ParaSite-Compara, HGNC:CAMK2B|ParaSite-Compara, HGNC:PHKG2|ParaSite-Compara, HGNC:DCLK1|ParaSite-Compara, HGNC:PHKG1|ParaSite-Compara	Is predicted to have protein serine\/threonine kinase activity. Human ortholog(s) of this gene are implicated in autosomal dominant mental retardation 54\; glycogen storage disease IXc\; and hypertrophic cardiomyopathy 1.
WBGene00019815	kin-34	R02C2.2	HGNC:CHEK1|Roundup;Panther;OrthoFinder;PhylomeDB, HGNC:CAMKV|ParaSite-Compara, HGNC:PNCK|ParaSite-Compara, HGNC:MYLK2|ParaSite-Compara, HGNC:CAMK1G|ParaSite-Compara, HGNC:DCLK2|ParaSite-Compara, HGNC:CAMK2B|ParaSite-Compara, HGNC:PHKG2|ParaSite-Compara, HGNC:DCLK1|ParaSite-Compara, HGNC:PHKG1|ParaSite-Compara	Is an ortholog of human CHEK1 (checkpoint kinase 1). Is predicted to have protein serine\/threonine kinase activity. Human ortholog(s) of this gene are implicated in autosomal dominant mental retardation 54\; glycogen storage disease IXc\; and hypertrophic cardiomyopathy 1.
WBGene00019561	K09C6.7	K09C6.7	N.A.	Is predicted to have protein serine\/threonine kinase activity.
WBGene00019562	K09C6.8	K09C6.8	N.A.	Is predicted to have protein serine\/threonine kinase activity.
WBGene00016513	C38C3.4	C38C3.4	N.A.	Is predicted to have protein serine\/threonine kinase activity.
WBGene00016059	hir-1	C24G6.2	HGNC:STYK1|TreeFam;EnsEMBL-Compara, HGNC:FLT4|ParaSite-Compara, HGNC:EPHA10|ParaSite-Compara, HGNC:AXL|ParaSite-Compara, HGNC:EPHB6|ParaSite-Compara, HGNC:NTRK2|ParaSite-Compara, HGNC:INSRR|ParaSite-Compara, HGNC:EPHA6|ParaSite-Compara, HGNC:PDGFRA|ParaSite-Compara, HGNC:LMTK2|ParaSite-Compara, HGNC:DDR1|ParaSite-Compara, HGNC:NTRK1|ParaSite-Compara, HGNC:ERBB2|ParaSite-Compara, HGNC:EPHB2|ParaSi…	Is predicted to have transmembrane receptor protein tyrosine kinase activity. Is expressed in pharynx and seam cell. Human ortholog(s) of this gene are implicated in several diseases, including gastrointestinal system cancer (multiple)\; hematologic cancer (multiple)\; and synostosis (multiple).
WBGene00006437	mrck-1	K08B12.5	HGNC:CDC42BPB|EnsEMBL-Compara;OrthoInspector;PhylomeDB;Hieranoid;Panther;Roundup;Inparanoid;OrthoFinder;OMA;ParaSite-Compara, HGNC:CDC42BPG|OrthoInspector;EnsEMBL-Compara;PhylomeDB;Panther;Inparanoid;OrthoFinder;OMA;ParaSite-Compara, HGNC:CDC42BPA|OrthoInspector;EnsEMBL-Compara;PhylomeDB;Hieranoid;Panther;Roundup;OrthoFinder;Inparanoid;OMA;ParaSite-Compara, HGNC:DMPK|EnsEMBL-Compara;OrthoFinder;P…	Is an ortholog of human CDC42BPA (CDC42 binding protein kinase alpha) and CDC42BPB (CDC42 binding protein kinase beta). Is predicted to have protein serine\/threonine kinase activity. Is involved in several processes, including embryonic body morphogenesis\; positive regulation of endocytic recycling\; and regulation of Golgi organization. Localizes to cytoplasm. Is expressed in Ea and Ep.
WBGene00004740	scd-2	T10H9.2	HGNC:LTK|EnsEMBL-Compara;PhylomeDB;Hieranoid;Panther;Roundup;TreeFam;Inparanoid;OrthoInspector;OrthoFinder;ParaSite-Compara, HGNC:ALK|EnsEMBL-Compara;OrthoInspector;PhylomeDB;Hieranoid;Panther;Roundup;TreeFam;Inparanoid;OrthoFinder;ParaSite-Compara, HGNC:FLT4|ParaSite-Compara, HGNC:EPHA10|ParaSite-Compara, HGNC:AXL|ParaSite-Compara, HGNC:EPHB6|ParaSite-Compara, HGNC:NTRK2|ParaSite-Compara, HGNC:I…	Is an ortholog of human ALK (ALK receptor tyrosine kinase) and LTK (leukocyte receptor tyrosine kinase). Is predicted to have Wnt-protein binding activity and transmembrane receptor protein tyrosine kinase activity. Is involved in dauer larval development\; sensory perception of chemical stimulus\; and sensory processing. Is expressed in AIAL\; AIAR\; NSML\; and NSMR. Human ortholog(s) of this ge…
WBGene00022603	gck-2	ZC404.9	HGNC:MAP4K3|EnsEMBL-Compara;PhylomeDB;Hieranoid;Panther;Roundup;TreeFam;OrthoFinder;Inparanoid;OMA;ParaSite-Compara, HGNC:MAP4K2|OrthoInspector;PhylomeDB;Hieranoid;Panther;TreeFam;Inparanoid;OrthoFinder;OMA, HGNC:MAP4K5|OrthoInspector;EnsEMBL-Compara;PhylomeDB;Hieranoid;Panther;Roundup;TreeFam;Inparanoid;OrthoFinder;OMA, HGNC:MAP4K1|TreeFam;Panther;OrthoFinder;PhylomeDB	Is an ortholog of human MAP4K3 (mitogen-activated protein kinase kinase kinase kinase 3) and MAP4K5 (mitogen-activated protein kinase kinase kinase kinase 5). Is predicted to have MAP kinase kinase kinase kinase activity. Is used to study ciliopathy.
WBGene00019642	K11C4.1	K11C4.1	N.A.	Is predicted to have protein serine\/threonine kinase activity.
WBGene00017310	F09G2.1	F09G2.1	HGNC:FLT4|ParaSite-Compara, HGNC:EPHA3|ParaSite-Compara, HGNC:EPHA10|ParaSite-Compara, HGNC:AXL|ParaSite-Compara, HGNC:EPHB6|ParaSite-Compara, HGNC:ALK|ParaSite-Compara, HGNC:NTRK2|ParaSite-Compara, HGNC:INSRR|ParaSite-Compara, HGNC:EPHA6|ParaSite-Compara, HGNC:PDGFRA|ParaSite-Compara, HGNC:LMTK2|ParaSite-Compara, HGNC:DDR1|ParaSite-Compara, HGNC:NTRK1|ParaSite-Compara, HGNC:IGF1R|ParaSite-Compar…	Is predicted to have transmembrane receptor protein tyrosine kinase activity. Human ortholog(s) of this gene are implicated in several diseases, including bone development disease (multiple)\; gastrointestinal system cancer (multiple)\; and hematologic cancer (multiple).
WBGene00000098	air-1	K07C11.2	HGNC:AURKC|Panther;OrthoFinder;PhylomeDB;ParaSite-Compara, HGNC:AURKB|Panther;OrthoFinder;PhylomeDB, HGNC:AURKA|Panther;OrthoFinder;PhylomeDB	Is an ortholog of human AURKC (aurora kinase C). Exhibits protein kinase activity. Is involved in mitotic spindle assembly\; positive regulation of protein localization to centrosome\; and protein phosphorylation. Localizes to condensed nuclear chromosome and cytoskeleton. Is expressed in anterior distal tip cell\; germ line\; and posterior distal tip cell. Human ortholog(s) of this gene are impl…
WBGene00004395	rol-3	C16D9.2	HGNC:ROS1|OrthoInspector;PhylomeDB;Hieranoid;TreeFam;Inparanoid	Is an ortholog of human ROS1 (ROS proto-oncogene 1, receptor tyrosine kinase). Is predicted to have ATP binding activity and protein kinase activity. Is involved in embryo development and locomotion. Localizes to cell leading edge and cell periphery. Is expressed in head\; seam cell\; and vulval precursor cell.
WBGene00018178	F38E1.3	F38E1.3	N.A.	Is predicted to have protein serine\/threonine kinase activity.
WBGene00001534	gcy-7	F52E1.4	N.A.	Is predicted to have guanylate cyclase activity and peptide receptor activity. Is involved in chemosensory behavior\; chemotaxis\; and response to magnesium ion. Localizes to cilium. Is expressed in ASEL.
WBGene00001526	gck-1	T19A5.2	HGNC:STK26|EnsEMBL-Compara;OrthoInspector;PhylomeDB;Hieranoid;Roundup;TreeFam;Inparanoid;Panther;OrthoFinder, HGNC:STK25|EnsEMBL-Compara;OrthoInspector;PhylomeDB;Hieranoid;Panther;Roundup;TreeFam;Inparanoid;OrthoFinder, HGNC:STK24|EnsEMBL-Compara;OrthoInspector;PhylomeDB;Hieranoid;Roundup;TreeFam;Inparanoid;Panther;OrthoFinder, HGNC:SBK2|ParaSite-Compara, HGNC:SLK|ParaSite-Compara, HGNC:TAOK3|Par…	Is an ortholog of human STK24 (serine\/threonine kinase 24)\; STK25 (serine\/threonine kinase 25)\; and STK26 (serine\/threonine kinase 26). Exhibits mitogen-activated protein kinase binding activity and protein serine\/threonine kinase activity. Is involved in several processes, including negative regulation of MAP kinase activity\; positive regulation of endocytic recycling\; and regulation of …
WBGene00008235	C50F4.10	C50F4.10	N.A.	Is predicted to have protein serine\/threonine kinase activity.
WBGene00000226	atl-1	T06E4.3	HGNC:ATR|Panther;OrthoInspector;EnsEMBL-Compara;OrthoFinder;ParaSite-Compara, HGNC:ATM|ParaSite-Compara, HGNC:PRKDC|ParaSite-Compara, HGNC:TRRAP|ParaSite-Compara	Is an ortholog of human ATR (ATR serine\/threonine kinase). Is predicted to have 1-phosphatidylinositol-3-kinase activity and protein serine\/threonine kinase activity. Is involved in DNA damage checkpoint\; embryo development\; and meiotic chromosome segregation. Localizes to nucleus. Is expressed in gonad. Human ortholog(s) of this gene are implicated in Seckel syndrome 1\; ataxia telangiectasi…
WBGene00008243	C50H2.7	C50H2.7	N.A.	Is predicted to have histone kinase activity (H3-T3 specific).
WBGene00000102	akt-1	C12D8.10	HGNC:AKT2|EnsEMBL-Compara;OrthoInspector;PhylomeDB;Hieranoid;Panther;Roundup;Inparanoid;OrthoFinder;OMA, HGNC:AKT1|EnsEMBL-Compara;OrthoInspector;PhylomeDB;Hieranoid;Panther;Roundup;Inparanoid;OrthoFinder;OMA, HGNC:AKT3|OrthoInspector;EnsEMBL-Compara;PhylomeDB;Hieranoid;Panther;Roundup;OrthoFinder;Inparanoid;OMA, HGNC:PRKCD|ParaSite-Compara, HGNC:PRKCQ|ParaSite-Compara	Is an ortholog of human AKT1 (AKT serine\/threonine kinase 1)\; AKT2 (AKT serine\/threonine kinase 2)\; and AKT3 (AKT serine\/threonine kinase 3). Exhibits calmodulin binding activity\; phosphatidylinositol-3,4,5-trisphosphate binding activity\; and protein serine\/threonine kinase activity. Is involved in several processes, including cellular protein modification process\; insulin receptor signa…
WBGene00001533	gcy-6	B0024.6	N.A.	Is predicted to have guanylate cyclase activity and peptide receptor activity. Is involved in several processes, including chemosensory behavior\; positive regulation of calcium-mediated signaling\; and response to magnesium ion. Is expressed in ASEL.
WBGene00006443	pak-2	C45B11.1	HGNC:PAK4|EnsEMBL-Compara;OrthoInspector;PhylomeDB;Hieranoid;Roundup;TreeFam;Inparanoid;OrthoFinder;OMA, HGNC:BUB1B-PAK6|OrthoInspector;PhylomeDB;Hieranoid;Inparanoid;OrthoFinder, HGNC:PAK5|EnsEMBL-Compara;OrthoInspector;PhylomeDB;Hieranoid;Roundup;TreeFam;Inparanoid;OrthoFinder;OMA, HGNC:PAK6|EnsEMBL-Compara;TreeFam;OrthoInspector;OrthoFinder, HGNC:SBK2|ParaSite-Compara, HGNC:SLK|ParaSite-Compar…	Is an ortholog of human PAK4 (p21 (RAC1) activated kinase 4) and PAK5 (p21 (RAC1) activated kinase 5). Is predicted to have protein serine\/threonine kinase activity. Is involved in nematode larval development. Human ortholog(s) of this gene are implicated in lung cancer.
WBGene00000907	daf-11	B0240.3	N.A.	Is predicted to have guanylate cyclase activity and peptide receptor activity. Is involved in several processes, including cellular response to cGMP\; chemotaxis to cAMP\; and positive regulation of transforming growth factor beta receptor signaling pathway. Localizes to dendrite\; neuronal cell body\; and non-motile cilium.
WBGene00008410	D2023.6	D2023.6	HGNC:ADCK1|OrthoInspector;EnsEMBL-Compara;PhylomeDB;Hieranoid;Panther;Roundup;TreeFam;Inparanoid;OrthoFinder;OMA;ParaSite-Compara	Is an ortholog of human ADCK1 (aarF domain containing kinase 1). Is predicted to encode a protein with the following domains: ABC1 family\; UbiB domain\; and Protein kinase-like domain superfamily.
WBGene00004032	pkc-1	F57F5.5	HGNC:PRKCH|OrthoInspector;EnsEMBL-Compara;PhylomeDB;Hieranoid;Panther;Roundup;OrthoFinder;Inparanoid, HGNC:PRKCE|OrthoInspector;EnsEMBL-Compara;PhylomeDB;Hieranoid;Panther;Roundup;OrthoFinder;Inparanoid;OMA, HGNC:PRKCA|ParaSite-Compara, HGNC:PKN3|ParaSite-Compara	Is an ortholog of human PRKCE (protein kinase C epsilon). Exhibits protein kinase C activity. Is involved in several processes, including insulin-like growth factor receptor signaling pathway\; regulated exocytosis\; and sensory perception of touch. Localizes to cell. Is expressed in ganglia\; linker cell\; and neurons.
WBGene00010096	rskd-1	F55C5.7	HGNC:SNX15|EnsEMBL-Compara;PhylomeDB;Panther;Roundup;TreeFam;OrthoFinder;ParaSite-Compara, HGNC:RPS6KC1|EnsEMBL-Compara;OrthoInspector;PhylomeDB;Hieranoid;Panther;Roundup;TreeFam;Inparanoid;OrthoFinder;ParaSite-Compara, HGNC:RPS6KL1|OrthoInspector;EnsEMBL-Compara;PhylomeDB;Panther;Roundup;TreeFam;Inparanoid;Hieranoid;ParaSite-Compara	Is an ortholog of human RPS6KC1 (ribosomal protein S6 kinase C1). Is predicted to have ATP binding activity\; phosphatidylinositol binding activity\; and protein kinase activity. Is expressed in GABAergic neurons\; rectal muscle\; retrovesicular ganglion\; and somatic nervous system.
WBGene00001539	gcy-13	F23H12.6	N.A.	Is predicted to have guanylate cyclase activity and peptide receptor activity. Is expressed in RIML\; RIMR\; and nervous system.
WBGene00011283	ttbk-7	R90.1	HGNC:TTBK2|OrthoInspector;PhylomeDB;Hieranoid;Panther;Roundup;Inparanoid;OrthoFinder;EnsEMBL-Compara, HGNC:TTBK1|OrthoInspector;Hieranoid;Panther;Roundup;Inparanoid;OrthoFinder;EnsEMBL-Compara	Is an ortholog of human TTBK2 (tau tubulin kinase 2). Is predicted to have protein serine\/threonine kinase activity. Is expressed in amphid neurons.
WBGene00012337	scyl-1	W07G4.3	HGNC:SCYL1|OrthoInspector;EnsEMBL-Compara;PhylomeDB;Hieranoid;Panther;Roundup;OrthoFinder;Inparanoid;OMA;ParaSite-Compara	Is an ortholog of human SCYL1 (SCY1 like pseudokinase 1). Is predicted to have kinase activity. Human ortholog(s) of this gene are implicated in autosomal recessive spinocerebellar ataxia 21.
WBGene00011191	R10D12.10	R10D12.10	N.A.	Is predicted to have protein serine\/threonine kinase activity.
WBGene00011623	T08G5.2	T08G5.2	N.A.	Is affected by rsr-2\; drh-3\; and eat-2 based on tiling array and RNA-seq studies. Is affected by four chemicals including allantoin\; Sirolimus\; and Psoralens based on RNA-seq studies. Is predicted to encode a protein with the following domains: Domain of unknown function (DUF19) and Domain of unknown function DUF19.
WBGene00003916	par-1	H39E23.1	HGNC:MARK3|EnsEMBL-Compara;OrthoInspector;PhylomeDB;Hieranoid;Panther;Roundup;TreeFam;OrthoFinder;Inparanoid;OMA, HGNC:MARK1|EnsEMBL-Compara;OrthoInspector;PhylomeDB;Hieranoid;Panther;TreeFam;Inparanoid;OrthoFinder;OMA, HGNC:MARK2|EnsEMBL-Compara;OrthoInspector;PhylomeDB;Hieranoid;Roundup;TreeFam;Inparanoid;OrthoFinder;OMA;Panther, HGNC:MARK4|EnsEMBL-Compara;OrthoInspector;PhylomeDB;Hieranoid;Pan…	Is an ortholog of human MARK2 (microtubule affinity regulating kinase 2) and MARK3 (microtubule affinity regulating kinase 3). Exhibits myosin II tail binding activity\; protein serine\/threonine kinase activity\; and ubiquitin protein ligase binding activity. Is involved in several processes, including asymmetric neuroblast division\; asymmetric protein localization involved in cell fate determi…
WBGene00007049	tag-191	C53A5.4	N.A.	Is predicted to have protein serine\/threonine kinase activity.
WBGene00011339	T01G5.1	T01G5.1	HGNC:FLT4|ParaSite-Compara, HGNC:EPHA3|ParaSite-Compara, HGNC:EPHA10|ParaSite-Compara, HGNC:AXL|ParaSite-Compara, HGNC:EPHB6|ParaSite-Compara, HGNC:ALK|ParaSite-Compara, HGNC:NTRK2|ParaSite-Compara, HGNC:INSRR|ParaSite-Compara, HGNC:EPHA6|ParaSite-Compara, HGNC:PDGFRA|ParaSite-Compara, HGNC:LMTK2|ParaSite-Compara, HGNC:DDR1|ParaSite-Compara, HGNC:NTRK1|ParaSite-Compara, HGNC:IGF1R|ParaSite-Compar…	Is predicted to have transmembrane receptor protein tyrosine kinase activity. Human ortholog(s) of this gene are implicated in several diseases, including dysostosis (multiple)\; gastrointestinal system cancer (multiple)\; and hematologic cancer (multiple).
WBGene00002211	kin-30	M01B2.1	HGNC:KIT|Panther;OrthoInspector;EnsEMBL-Compara;ParaSite-Compara, HGNC:PDGFRA|EnsEMBL-Compara;OrthoInspector;Panther;ParaSite-Compara, HGNC:PDGFRB|Panther;EnsEMBL-Compara;OrthoInspector;ParaSite-Compara, HGNC:CSF1R|Panther;EnsEMBL-Compara;OrthoInspector;ParaSite-Compara, HGNC:FLT3|Panther;OrthoInspector;EnsEMBL-Compara;ParaSite-Compara, HGNC:FLT4|ParaSite-Compara, HGNC:EPHA10|ParaSite-Compara, HG…	Is an ortholog of several human genes including KIT (KIT proto-oncogene, receptor tyrosine kinase)\; PDGFRA (platelet derived growth factor receptor alpha)\; and PDGFRB (platelet derived growth factor receptor beta). Is predicted to have transmembrane receptor protein tyrosine kinase activity. Human ortholog(s) of this gene are implicated in several diseases, including bone development disease (m…
WBGene00001545	gcy-20	F21H7.9	HGNC:GUCY2F|Panther;TreeFam;EnsEMBL-Compara, HGNC:GUCY2D|Panther;TreeFam;EnsEMBL-Compara	Is an ortholog of human GUCY2D (guanylate cyclase 2D, retinal) and GUCY2F (guanylate cyclase 2F, retinal). Is predicted to have guanylate cyclase activity and peptide receptor activity. Is expressed in ASEL\; AWCL\; AWCR\; excretory canal\; and excretory gland cell.
WBGene00012019	dkf-2	T25E12.4	HGNC:PRKD3|EnsEMBL-Compara;OrthoInspector;PhylomeDB;Hieranoid;Panther;Roundup;TreeFam;Inparanoid;OMA;ParaSite-Compara, HGNC:PRKD2|OrthoInspector;PhylomeDB;Hieranoid;Panther;Roundup;TreeFam;Inparanoid;OMA;ParaSite-Compara, HGNC:PRKD1|OrthoInspector;PhylomeDB;Hieranoid;Panther;Roundup;TreeFam;Inparanoid;OMA;ParaSite-Compara	Is an ortholog of human PRKD3 (protein kinase D3). Exhibits protein homodimerization activity and protein serine\/threonine kinase activity. Is involved in several processes, including defense response to other organism\; determination of adult lifespan\; and protein import into nucleus. Localizes to cytoplasmic side of plasma membrane\; cytosol\; and serine\/threonine protein kinase complex. Is …
WBGene00012632	Y38H6C.20	Y38H6C.20	HGNC:STYK1|EnsEMBL-Compara;Panther;ParaSite-Compara	Is an ortholog of human STYK1 (serine\/threonine\/tyrosine kinase 1). Is predicted to have protein kinase activity.
WBGene00001547	gcy-22	T03D8.5	HGNC:GUCY2F|EnsEMBL-Compara;TreeFam;Panther, HGNC:GUCY2D|EnsEMBL-Compara;TreeFam;Panther	Is an ortholog of human GUCY2D (guanylate cyclase 2D, retinal) and GUCY2F (guanylate cyclase 2F, retinal). Is predicted to have guanylate cyclase activity and peptide receptor activity. Is involved in several processes, including response to lithium ion\; response to magnesium ion\; and response to methionine. Is expressed in ASER.
WBGene00011612	T08D2.7	T08D2.7	HGNC:CHEK2|OrthoInspector;EnsEMBL-Compara;PhylomeDB;Hieranoid;Panther;Roundup;TreeFam;Inparanoid;OrthoFinder;OMA;ParaSite-Compara	Is an ortholog of human CHEK2 (checkpoint kinase 2). Is predicted to have protein serine\/threonine kinase activity. Human ortholog(s) of this gene are implicated in several diseases, including Li-Fraumeni syndrome 2\; osteosarcoma\; and prostate cancer.
WBGene00019864	ceh-93	R04A9.5	N.A.	Is predicted to have DNA-binding transcription repressor activity, RNA polymerase II-specific and RNA polymerase II regulatory region sequence-specific DNA binding activity. Is expressed in seam cell.
WBGene00017898	F28C10.3	F28C10.3	HGNC:RPS6KA6|ParaSite-Compara, HGNC:RPS6KA1|ParaSite-Compara, HGNC:RPS6KB2|ParaSite-Compara	Is predicted to have ribosomal protein S6 kinase activity.
WBGene00017423	F13C5.2	F13C5.2	HGNC:CECR2|ParaSite-Compara, HGNC:KAT2A|ParaSite-Compara, HGNC:BAZ2A|ParaSite-Compara, HGNC:BAZ1A|ParaSite-Compara	Is expressed widely. Is predicted to encode a protein with the following domains: Phosphorylation site\; Bromodomain\; Bromodomain\; and Bromodomain-like superfamily.
WBGene00019321	K02E10.7	K02E10.7	HGNC:STK33|EnsEMBL-Compara;PhylomeDB;ParaSite-Compara	Is an ortholog of human STK33 (serine\/threonine kinase 33). Is predicted to have protein serine\/threonine kinase activity.
WBGene00002210	kin-29	F58H12.1	HGNC:SIK1B|Panther;EnsEMBL-Compara;OrthoFinder, HGNC:SIK2|EnsEMBL-Compara;TreeFam;Panther;OrthoFinder;ParaSite-Compara, HGNC:SIK1|Panther;TreeFam;EnsEMBL-Compara;OrthoFinder	Is an ortholog of human SIK2 (salt inducible kinase 2). Exhibits histone deacetylase inhibitor activity and protein serine\/threonine kinase activity. Is involved in several processes, including dauer entry\; positive regulation of growth rate\; and transforming growth factor beta receptor signaling pathway. Localizes to cytoplasm and nucleus. Is expressed in several structures, including intesti…
WBGene00017381	ddr-2	F11D5.3	HGNC:DDR1|OrthoInspector;PhylomeDB;Hieranoid;Panther;TreeFam;Inparanoid;OrthoFinder;EnsEMBL-Compara;OMA;ParaSite-Compara, HGNC:DDR2|OrthoInspector;EnsEMBL-Compara;PhylomeDB;Hieranoid;Panther;Roundup;TreeFam;Inparanoid;OrthoFinder;OMA;ParaSite-Compara, HGNC:FLT4|ParaSite-Compara, HGNC:EPHA10|ParaSite-Compara, HGNC:EPHB6|ParaSite-Compara, HGNC:KIT|ParaSite-Compara, HGNC:IGF1R|ParaSite-Compara, HGNC…	Is an ortholog of human DDR2 (discoidin domain receptor tyrosine kinase 2). Exhibits protein tyrosine kinase activity. Is involved in interneuron axon guidance\; motor neuron axon guidance\; and positive regulation of axon regeneration. Localizes to axon and plasma membrane. Is expressed in DD neuron\; SAB\; hypodermis\; rectal gland cell\; and tail. Human ortholog(s) of this gene are implicated …
WBGene00004727	sax-1	R11G1.4	HGNC:STK38|OrthoInspector;EnsEMBL-Compara;PhylomeDB;Hieranoid;Panther;Roundup;OrthoFinder;Inparanoid;OMA;ParaSite-Compara, HGNC:STK38L|OrthoInspector;EnsEMBL-Compara;PhylomeDB;Hieranoid;Panther;Roundup;Inparanoid;OrthoFinder;OMA;ParaSite-Compara	Is an ortholog of human STK38 (serine\/threonine kinase 38) and STK38L (serine\/threonine kinase 38 like). Is predicted to have ATP binding activity and protein serine\/threonine kinase activity. Is involved in several processes, including cell projection assembly\; negative regulation of cell growth\; and regulation of cell shape. Localizes to several cellular components, including axon\; dendri…
WBGene00015293	C01C4.3	C01C4.3	HGNC:SBK2|OrthoInspector;EnsEMBL-Compara;Hieranoid;Roundup;TreeFam;OrthoFinder;Inparanoid;ParaSite-Compara, HGNC:SBK1|OrthoInspector;EnsEMBL-Compara;Hieranoid;Roundup;TreeFam;OrthoFinder;Inparanoid;OMA, HGNC:SBK3|Hieranoid;TreeFam;EnsEMBL-Compara;PhylomeDB;OrthoFinder, HGNC:SLK|ParaSite-Compara, HGNC:TAOK3|ParaSite-Compara, HGNC:MAP2K3|ParaSite-Compara, HGNC:MAP3K8|ParaSite-Compara, HGNC:MAP3K1|P…	Is an ortholog of human SBK2 (SH3 domain binding kinase family member 2) and Sbk1. Is predicted to have protein serine\/threonine kinase activity. Human ortholog(s) of this gene are implicated in 46 XY gonadal dysgenesis and lung cancer.
WBGene00018569	F47F2.1	F47F2.1	HGNC:PRKY|Panther;Inparanoid;PhylomeDB;Hieranoid;OrthoFinder;ParaSite-Compara, HGNC:PRKX|OrthoInspector;EnsEMBL-Compara;PhylomeDB;Panther;Roundup;TreeFam;Inparanoid;OrthoFinder;OMA;Hieranoid;ParaSite-Compara	Is an ortholog of human PRKX (protein kinase X-linked). Is predicted to have cAMP-dependent protein kinase activity. Localizes to cytoplasm.
WBGene00003007	lin-18	C16B8.1	HGNC:RYK|EnsEMBL-Compara;OrthoInspector;PhylomeDB;Hieranoid;Panther;Inparanoid;OrthoFinder;OMA;ParaSite-Compara	Is an ortholog of human RYK (receptor like tyrosine kinase). Is predicted to have ATP binding activity and protein kinase activity. Is involved in several processes, including asymmetric protein localization involved in cell fate determination\; axis specification\; and positive regulation of neurogenesis. Localizes to cytoplasm\; nucleus\; and plasma membrane. Is expressed in body wall musculatu…
WBGene00001994	hpk-1	F20B6.8	HGNC:HIPK3|OrthoInspector;EnsEMBL-Compara;PhylomeDB;Panther;Roundup;TreeFam;OrthoFinder, HGNC:HIPK2|EnsEMBL-Compara;OrthoInspector;PhylomeDB;Panther;Roundup;TreeFam;OrthoFinder;ParaSite-Compara, HGNC:HIPK1|EnsEMBL-Compara;OrthoInspector;PhylomeDB;Panther;Roundup;TreeFam;OrthoFinder;ParaSite-Compara, HGNC:CLK3|ParaSite-Compara, HGNC:DYRK3|ParaSite-Compara, HGNC:DYRK1A|ParaSite-Compara, HGNC:DYRK2|…	Is an ortholog of human HIPK1 (homeodomain interacting protein kinase 1) and HIPK2 (homeodomain interacting protein kinase 2). Is predicted to have protein serine\/threonine kinase activity and protein tyrosine kinase activity. Is involved in several processes, including autophagosome assembly\; determination of adult lifespan\; and response to heat. Localizes to nucleus. Is expressed in several …
WBGene00017472	cst-1	F14H12.4	HGNC:STK3|EnsEMBL-Compara;OrthoInspector;PhylomeDB;Hieranoid;Panther;Roundup;TreeFam;OrthoFinder;Inparanoid;OMA;ParaSite-Compara, HGNC:STK4|OrthoInspector;PhylomeDB;Hieranoid;Panther;Roundup;TreeFam;OrthoFinder;Inparanoid;OMA	Is an ortholog of human STK3 (serine\/threonine kinase 3). Exhibits protein serine\/threonine kinase activity. Is involved in determination of adult lifespan and muscle fiber development. Is expressed in hypodermis\; sensory neurons\; terminal bulb\; and vulva.
WBGene00020324	T07F12.4	T07F12.4	HGNC:NEK3|ParaSite-Compara	Is predicted to have protein serine\/threonine kinase activity.
WBGene00018034	sek-5	F35C8.1	HGNC:MAP2K7|TreeFam;EnsEMBL-Compara;PhylomeDB, HGNC:NEK1|ParaSite-Compara, HGNC:MAP3K2|ParaSite-Compara, HGNC:MAP3K4|ParaSite-Compara, HGNC:MAP3K3|ParaSite-Compara, HGNC:MAP2K5|ParaSite-Compara	Is an ortholog of human MAP2K7 (mitogen-activated protein kinase kinase 7). Is predicted to have MAP kinase kinase activity and protein serine\/threonine kinase activity. Human ortholog(s) of this gene are implicated in short-rib thoracic dysplasia 6 with or without polydactyly.
WBGene00018035	sek-4	F35C8.2	HGNC:MAP2K7|TreeFam;EnsEMBL-Compara;PhylomeDB, HGNC:NEK1|ParaSite-Compara, HGNC:MAP3K2|ParaSite-Compara, HGNC:MAP3K4|ParaSite-Compara, HGNC:MAP3K3|ParaSite-Compara, HGNC:MAP2K5|ParaSite-Compara	Is an ortholog of human MAP2K7 (mitogen-activated protein kinase kinase 7). Is predicted to have MAP kinase kinase activity and protein serine\/threonine kinase activity. Human ortholog(s) of this gene are implicated in short-rib thoracic dysplasia 6 with or without polydactyly.
WBGene00016104	ddr-1	C25F6.4	HGNC:DDR1|OMA;TreeFam;Panther;OrthoFinder, HGNC:DDR2|OMA;TreeFam;Panther;OrthoFinder	Is an ortholog of human DDR1 (discoidin domain receptor tyrosine kinase 1) and DDR2 (discoidin domain receptor tyrosine kinase 2). Is predicted to have collagen binding activity and protein tyrosine kinase collagen receptor activity. Is involved in motor neuron axon guidance and positive regulation of axon regeneration. Is expressed in hypodermis\; intestinal muscle\; nervous system\; and pharynx.
WBGene00018516	gakh-1	F46G11.3	HGNC:GAK|OrthoInspector;PhylomeDB;Hieranoid;Roundup;OrthoFinder, HGNC:BMP2K|ParaSite-Compara, HGNC:AAK1|ParaSite-Compara	Is an ortholog of human GAK (cyclin G associated kinase). Is predicted to have AP-2 adaptor complex binding activity and protein serine\/threonine kinase activity. Is expressed in intestine\; neurons\; and pharynx.
WBGene00003911	pak-1	C09B8.7	HGNC:PAK3|EnsEMBL-Compara;OrthoInspector;PhylomeDB;Panther;Roundup;OrthoFinder;Inparanoid;OMA;Hieranoid, HGNC:PAK2|OrthoInspector;EnsEMBL-Compara;PhylomeDB;Roundup;Inparanoid;OrthoFinder;OMA;Hieranoid, HGNC:PAK1|OrthoInspector;EnsEMBL-Compara;PhylomeDB;Panther;Roundup;OrthoFinder;Inparanoid;OMA;Hieranoid, HGNC:SBK2|ParaSite-Compara, HGNC:SLK|ParaSite-Compara, HGNC:TAOK3|ParaSite-Compara, HGNC:MAP…	Is an ortholog of human PAK1 (p21 (RAC1) activated kinase 1) and PAK3 (p21 (RAC1) activated kinase 3). Exhibits GTP binding activity and protein kinase activity. Is involved in several processes, including hemidesmosome assembly\; inductive cell migration\; and motor neuron axon guidance. Localizes to several cellular components, including cytosol\; hemidesmosome\; and neuronal cell body. Colocal…
WBGene00015376	C03B1.5	C03B1.5	HGNC:SBK2|ParaSite-Compara, HGNC:SLK|ParaSite-Compara, HGNC:TAOK3|ParaSite-Compara, HGNC:MAP2K3|ParaSite-Compara, HGNC:NEK4|ParaSite-Compara, HGNC:MAP4K1|ParaSite-Compara, HGNC:MAP3K8|ParaSite-Compara, HGNC:STK10|ParaSite-Compara, HGNC:MAP4K2|ParaSite-Compara, HGNC:MAP4K5|ParaSite-Compara, HGNC:OXSR1|ParaSite-Compara, HGNC:PAK4|ParaSite-Compara, HGNC:PAK5|ParaSite-Compara, HGNC:STRADA|ParaSite-Co…	Is predicted to have ATP binding activity and non-membrane spanning protein tyrosine kinase activity. Human ortholog(s) of this gene are implicated in lung cancer.
WBGene00020504	svh-2	T14E8.1	HGNC:MERTK|Panther;TreeFam;EnsEMBL-Compara;ParaSite-Compara, HGNC:AXL|EnsEMBL-Compara;TreeFam;Panther, HGNC:TYRO3|EnsEMBL-Compara;TreeFam;Panther;ParaSite-Compara, HGNC:FLT4|ParaSite-Compara, HGNC:EPHA10|ParaSite-Compara, HGNC:KIT|ParaSite-Compara, HGNC:NTRK2|ParaSite-Compara, HGNC:TEK|ParaSite-Compara, HGNC:ERBB4|ParaSite-Compara, HGNC:DDR1|ParaSite-Compara, HGNC:INSRR|ParaSite-Compara, HGNC:KDR…	Is an ortholog of human MERTK (MER proto-oncogene, tyrosine kinase) and TYRO3 (TYRO3 protein tyrosine kinase). Exhibits mitogen-activated protein kinase kinase kinase binding activity and transmembrane receptor protein tyrosine kinase activity. Is involved in generation of neurons\; peptidyl-tyrosine autophosphorylation\; and positive regulation of MAPK cascade. Is expressed in distal tip cell\; …
WBGene00016464	C36B7.1	C36B7.1	HGNC:DYRK4|Panther;OrthoFinder, HGNC:CDKL4|ParaSite-Compara, HGNC:CDK15|ParaSite-Compara, HGNC:CDK8|ParaSite-Compara, HGNC:CDKL5|ParaSite-Compara, HGNC:CDKL3|ParaSite-Compara, HGNC:CDK14|ParaSite-Compara, HGNC:CDKL1|ParaSite-Compara, HGNC:CDK19|ParaSite-Compara, HGNC:CDK10|ParaSite-Compara, HGNC:CDKL2|ParaSite-Compara, HGNC:CDK2|ParaSite-Compara, HGNC:CDK17|ParaSite-Compara, HGNC:CDK13|ParaSite-C…	Is predicted to have protein serine\/threonine kinase activity. Human ortholog(s) of this gene are implicated in early infantile epileptic encephalopathy 2 and primary autosomal recessive microcephaly 12.
WBGene00003185	mek-1	K08A8.1	HGNC:MAP2K7|EnsEMBL-Compara;OrthoInspector;PhylomeDB;Hieranoid;Roundup;Inparanoid;OrthoFinder;OMA;ParaSite-Compara	Is an ortholog of human MAP2K7 (mitogen-activated protein kinase kinase 7). Exhibits JUN kinase kinase activity and SH2 domain binding activity. Is involved in several processes, including gamete generation\; positive regulation of axon extension involved in regeneration\; and stress-activated MAPK cascade. Is expressed in several structures, including ganglia\; hermaphrodite gonad\; intestine\; …
WBGene00004758	sek-1	R03G5.2	HGNC:MAP2K3|EnsEMBL-Compara;OrthoInspector;PhylomeDB;Hieranoid;Panther;OrthoFinder;Inparanoid;OMA, HGNC:MAP2K6|OrthoInspector;EnsEMBL-Compara;PhylomeDB;Hieranoid;Panther;Roundup;OrthoFinder;Inparanoid;OMA, HGNC:MAP3K2|ParaSite-Compara, HGNC:MAP3K4|ParaSite-Compara, HGNC:MAP3K3|ParaSite-Compara	Is an ortholog of human MAP2K6 (mitogen-activated protein kinase kinase 6). Exhibits MAP kinase kinase activity\; mitogen-activated protein kinase kinase kinase binding activity\; and protein serine\/threonine kinase activator activity. Is involved in several processes, including defense response to other organism\; p38MAPK cascade\; and positive regulation of oviposition. Is expressed in excreto…
WBGene00017714	F22F1.2	F22F1.2	N.A.	Is predicted to have protein serine\/threonine kinase activity.
WBGene00002239	ksr-1	F13B9.5	HGNC:KSR2|OrthoInspector;PhylomeDB;Hieranoid;Panther;Roundup;Inparanoid;EnsEMBL-Compara;OrthoFinder, HGNC:KSR1|OrthoInspector;PhylomeDB;Hieranoid;Panther;Roundup;Inparanoid;OMA;EnsEMBL-Compara;OrthoFinder, HGNC:BRAF|ParaSite-Compara, HGNC:MAP3K21|ParaSite-Compara, HGNC:LIMK1|ParaSite-Compara, HGNC:LIMK2|ParaSite-Compara, HGNC:RIPK3|ParaSite-Compara, HGNC:MAP3K11|ParaSite-Compara, HGNC:MLKL|ParaSi…	Is an ortholog of human KSR1 (kinase suppressor of ras 1). Exhibits mitogen-activated protein kinase kinase binding activity and protein kinase activity. Is involved in several processes, including defense response to Gram-positive bacterium\; myoblast migration\; and positive regulation of vulval development. Human ortholog(s) of this gene are implicated in several diseases, including LEOPARD sy…
WBGene00002195	kin-9	F08F1.1	HGNC:FLT4|ParaSite-Compara, HGNC:EPHA10|ParaSite-Compara, HGNC:AXL|ParaSite-Compara, HGNC:EPHB6|ParaSite-Compara, HGNC:NTRK2|ParaSite-Compara, HGNC:INSRR|ParaSite-Compara, HGNC:EPHA6|ParaSite-Compara, HGNC:PDGFRA|ParaSite-Compara, HGNC:LMTK2|ParaSite-Compara, HGNC:DDR1|ParaSite-Compara, HGNC:NTRK1|ParaSite-Compara, HGNC:IGF1R|ParaSite-Compara, HGNC:KIT|ParaSite-Compara, HGNC:TEK|ParaSite-Compara,…	Is predicted to have transmembrane receptor protein tyrosine kinase activity. Human ortholog(s) of this gene are implicated in several diseases, including bone development disease (multiple)\; gastrointestinal system cancer (multiple)\; and hematologic cancer (multiple).
WBGene00017039	trk-1	D1073.1	N.A.	Is predicted to have non-membrane spanning protein tyrosine kinase activity and signaling receptor binding activity.
WBGene00001708	grk-1	F19C6.1	HGNC:GRK4|EnsEMBL-Compara;OrthoInspector;PhylomeDB;Hieranoid;Panther;Roundup;Inparanoid;OrthoFinder;OMA;ParaSite-Compara, HGNC:GRK6|OrthoInspector;EnsEMBL-Compara;PhylomeDB;Hieranoid;Panther;Roundup;Inparanoid;OrthoFinder;OMA;ParaSite-Compara, HGNC:GRK5|EnsEMBL-Compara;OrthoInspector;PhylomeDB;Hieranoid;Panther;Roundup;Inparanoid;OrthoFinder;OMA;ParaSite-Compara, HGNC:GRK1|TreeFam;Panther;OrthoFi…	Is an ortholog of human GRK4 (G protein-coupled receptor kinase 4)\; GRK5 (G protein-coupled receptor kinase 5)\; and GRK6 (G protein-coupled receptor kinase 6). Is predicted to have ATP binding activity and G protein-coupled receptor kinase activity. Human ortholog(s) of this gene are implicated in Oguchi disease-2.
WBGene00003368	mkk-4	F42G10.2	HGNC:MAP2K4|OrthoInspector;EnsEMBL-Compara;PhylomeDB;Panther;Roundup;TreeFam;Inparanoid;OMA;Hieranoid;OrthoFinder;ParaSite-Compara	Is an ortholog of human MAP2K4 (mitogen-activated protein kinase kinase 4). Exhibits mitogen-activated protein kinase kinase kinase binding activity. Is involved in several processes, including activation of MAPK activity\; p38MAPK cascade\; and regulation of nervous system development. Localizes to cytoplasm. Is expressed in head\; neurons\; and pharynx.
WBGene00012162	sek-6	VZC374L.1	HGNC:MAP2K4|EnsEMBL-Compara;OrthoInspector;PhylomeDB;Panther;TreeFam;Inparanoid;Hieranoid;OrthoFinder;ParaSite-Compara	Is an ortholog of human MAP2K4 (mitogen-activated protein kinase kinase 4). Is predicted to have JUN kinase kinase activity and protein serine\/threonine kinase activity.
WBGene00009793	pkn-1	F46F6.2	HGNC:PKN1|EnsEMBL-Compara;OrthoInspector;PhylomeDB;Panther;Roundup;TreeFam;Inparanoid;OrthoFinder;OMA, HGNC:PKN3|EnsEMBL-Compara;OrthoInspector;PhylomeDB;Panther;Roundup;TreeFam;OrthoFinder;Inparanoid;OMA;ParaSite-Compara, HGNC:PKN2|EnsEMBL-Compara;OrthoInspector;PhylomeDB;Panther;Roundup;TreeFam;OrthoFinder;Inparanoid;OMA, HGNC:PRKCA|ParaSite-Compara	Is an ortholog of human PKN3 (protein kinase N3). Is predicted to have protein serine\/threonine kinase activity. Localizes to M band and striated muscle dense body. Is expressed in neurons and pharyngeal muscle cell.
WBGene00013917	cdk-11.2	ZC504.3	HGNC:CDK11B|OrthoInspector;EnsEMBL-Compara;Hieranoid;Panther;TreeFam;Inparanoid;OrthoFinder, HGNC:CDK11A|OrthoInspector;EnsEMBL-Compara;Hieranoid;Panther;TreeFam;Inparanoid;OrthoFinder, HGNC:CDKL4|ParaSite-Compara, HGNC:CDK4|ParaSite-Compara, HGNC:CDK6|ParaSite-Compara, HGNC:CDK15|ParaSite-Compara, HGNC:CDKL2|ParaSite-Compara, HGNC:CDK17|ParaSite-Compara, HGNC:CDKL5|ParaSite-Compara, HGNC:CDKL3|P…	Is an ortholog of human CDK11A (cyclin dependent kinase 11A) and CDK11B (cyclin dependent kinase 11B). Is predicted to have cyclin-dependent protein serine\/threonine kinase activity. Is involved in positive regulation of embryonic development. Localizes to cytoplasm and nucleus. Is expressed in gonad\; gonadal sheath cell\; somatic cell\; and somatic gonad. Human ortholog(s) of this gene are imp…
WBGene00003247	mig-15	ZC504.4	HGNC:NRK|Inparanoid;EnsEMBL-Compara;OrthoFinder, HGNC:TNIK|EnsEMBL-Compara;OrthoInspector;PhylomeDB;Hieranoid;Roundup;TreeFam;OrthoFinder;OMA;ParaSite-Compara, HGNC:MAP4K4|OrthoInspector;PhylomeDB;Hieranoid;TreeFam;OrthoFinder;OMA;Panther, HGNC:MINK1|EnsEMBL-Compara;OrthoInspector;PhylomeDB;Hieranoid;TreeFam;OrthoFinder;OMA;Panther;ParaSite-Compara	Is an ortholog of human MINK1 (misshapen like kinase 1) and TNIK (TRAF2 and NCK interacting kinase). Is predicted to have protein serine\/threonine kinase activity. Is involved in several processes, including body morphogenesis\; dorsal\/ventral axon guidance\; and regulation of GABAergic synaptic transmission. Is expressed in several structures, including QL\; QR\; body wall musculature\; pharyn…
WBGene00010342	F59F5.3	F59F5.3	HGNC:FLT4|ParaSite-Compara, HGNC:EPHA10|ParaSite-Compara, HGNC:EPHB6|ParaSite-Compara, HGNC:NTRK2|ParaSite-Compara, HGNC:INSRR|ParaSite-Compara, HGNC:PDGFRA|ParaSite-Compara, HGNC:LMTK2|ParaSite-Compara, HGNC:DDR1|ParaSite-Compara, HGNC:NTRK1|ParaSite-Compara, HGNC:ERBB2|ParaSite-Compara, HGNC:EPHB2|ParaSite-Compara, HGNC:MET|ParaSite-Compara, ENSG00000282278|ParaSite-Compara, HGNC:FLT1|ParaSite-…	Is predicted to have transmembrane receptor protein tyrosine kinase activity. Human ortholog(s) of this gene are implicated in several diseases, including brain disease (multiple)\; gastrointestinal system cancer (multiple)\; and hematologic cancer (multiple).
WBGene00006896	ver-3	F59F3.1	HGNC:FLT1|Hieranoid;OMA;OrthoInspector;Inparanoid;EnsEMBL-Compara;ParaSite-Compara, HGNC:KIT|Panther;EnsEMBL-Compara;OrthoInspector;PhylomeDB;ParaSite-Compara, HGNC:KDR|Hieranoid;OrthoInspector;EnsEMBL-Compara;Inparanoid;ParaSite-Compara, HGNC:FLT4|Hieranoid;EnsEMBL-Compara;OrthoInspector;Inparanoid;ParaSite-Compara, HGNC:FLT3|Panther;OrthoInspector;EnsEMBL-Compara;PhylomeDB;ParaSite-Compara, HGN…	Is an ortholog of human FLT1 (fms related receptor tyrosine kinase 1). Is predicted to have transmembrane receptor protein tyrosine kinase activity. Is involved in nematode male tail tip morphogenesis. Is expressed in ALA\; anal sphincter muscle\; and pharyngeal muscle cell. Human ortholog(s) of this gene are implicated in several diseases, including bone development disease (multiple)\; gastroin…
WBGene00006897	ver-4	F59F3.5	HGNC:FLT1|Hieranoid;OrthoInspector;Inparanoid;PhylomeDB;EnsEMBL-Compara;ParaSite-Compara, HGNC:FLT4|Hieranoid;Inparanoid;PhylomeDB;OrthoInspector;EnsEMBL-Compara;ParaSite-Compara, HGNC:KDR|Hieranoid;Inparanoid;PhylomeDB;EnsEMBL-Compara;OrthoInspector;ParaSite-Compara, HGNC:KIT|Panther;EnsEMBL-Compara;OrthoInspector;PhylomeDB;ParaSite-Compara, HGNC:PDGFRA|EnsEMBL-Compara;OrthoInspector;Panther;Phy…	Is an ortholog of human FLT1 (fms related receptor tyrosine kinase 1)\; FLT4 (fms related receptor tyrosine kinase 4)\; and KDR (kinase insert domain receptor). Is predicted to have transmembrane receptor protein tyrosine kinase activity. Is involved in nematode male tail tip morphogenesis. Human ortholog(s) of this gene are implicated in several diseases, including bone development disease (mult…
WBGene00001184	egl-15	F58A3.2	HGNC:FGFR1|OrthoInspector;EnsEMBL-Compara;PhylomeDB;Hieranoid;Panther;Roundup;TreeFam;Inparanoid;OrthoFinder;OMA, HGNC:FGFR3|EnsEMBL-Compara;OrthoInspector;PhylomeDB;Hieranoid;Panther;Roundup;TreeFam;Inparanoid;OrthoFinder;OMA, HGNC:FGFR4|EnsEMBL-Compara;OrthoInspector;PhylomeDB;Hieranoid;Panther;Roundup;TreeFam;Inparanoid;OrthoFinder;OMA, HGNC:FGFR2|EnsEMBL-Compara;OrthoInspector;PhylomeDB;Hiera…	Is an ortholog of human FGFR1 (fibroblast growth factor receptor 1)\; FGFR3 (fibroblast growth factor receptor 3)\; and FGFR4 (fibroblast growth factor receptor 4). Exhibits protein kinase activity. Is involved in several processes, including fibroblast growth factor receptor signaling pathway\; muscle cell cellular homeostasis\; and oviposition. Is expressed in head neurons\; hypodermis\; intest…
WBGene00003970	pek-1	F46C3.1	HGNC:EIF2AK3|EnsEMBL-Compara;OrthoInspector;PhylomeDB;Hieranoid;Roundup;TreeFam;Inparanoid;OrthoFinder;OMA, HGNC:EIF2AK2|ParaSite-Compara	Is an ortholog of human EIF2AK3 (eukaryotic translation initiation factor 2 alpha kinase 3). Exhibits eukaryotic translation initiation factor 2alpha kinase activity. Is involved in several processes, including PERK-mediated unfolded protein response\; peptidyl-serine phosphorylation\; and regulation of necrotic cell death. Is expressed in intestine\; muscle cell\; and neurons.
WBGene00008088	C44C10.7	C44C10.7	N.A.	Is predicted to have protein serine\/threonine kinase activity.
WBGene00003219	mes-1	F54F7.5	HGNC:SBK2|ParaSite-Compara, HGNC:SLK|ParaSite-Compara, HGNC:TAOK3|ParaSite-Compara, HGNC:MAP4K4|ParaSite-Compara, HGNC:MAP2K3|ParaSite-Compara, HGNC:NEK4|ParaSite-Compara, HGNC:MAP4K1|ParaSite-Compara, HGNC:MAP3K8|ParaSite-Compara, HGNC:MAP3K1|ParaSite-Compara, HGNC:STK10|ParaSite-Compara, HGNC:MAP4K2|ParaSite-Compara, HGNC:MAP4K5|ParaSite-Compara, HGNC:PAK3|ParaSite-Compara, HGNC:OXSR1|ParaSite-…	Is predicted to have protein serine\/threonine kinase activity and protein tyrosine kinase activity. Is involved in several processes, including asymmetric protein localization involved in cell fate determination\; establishment of mitotic spindle localization\; and left\/right axis specification. Localizes to plasma membrane. Is expressed in E\; Psub2\; Psub3\; and Psub4. Human ortholog(s) of th…
WBGene00011357	T01H10.4	T01H10.4	N.A.	Is affected by wdr-5.1\; swsn-2.2\; and hmg-3 based on microarray and RNA-seq studies. Is affected by four chemicals including methylmercuric chloride\; resveratrol\; and dafa#1 based on microarray studies.
WBGene00008956	nekl-3	F19H6.1	HGNC:NEK6|OrthoInspector;EnsEMBL-Compara;PhylomeDB;Hieranoid;Panther;Roundup;OrthoFinder;Inparanoid;OMA, HGNC:NEK7|EnsEMBL-Compara;OrthoInspector;PhylomeDB;Hieranoid;Panther;Roundup;OrthoFinder;Inparanoid;OMA;ParaSite-Compara	Is an ortholog of human NEK7 (NIMA related kinase 7). Is predicted to have ATP binding activity\; metal ion binding activity\; and protein serine\/threonine kinase activity. Is involved in gonad development and molting cycle. Localizes to apical plasma membrane. Is expressed in hyp7 syncytium\; hypodermal cell\; neurons\; and vulva.
WBGene00002991	lin-2	F17E5.1	HGNC:CASK|OrthoInspector;EnsEMBL-Compara;PhylomeDB;Hieranoid;Panther;Roundup;TreeFam;Inparanoid;OrthoFinder;OMA, HGNC:MPP1|EnsEMBL-Compara;TreeFam;Panther;OrthoFinder;ParaSite-Compara, HGNC:MPP7|ParaSite-Compara, HGNC:MPP4|ParaSite-Compara, HGNC:MPP6|ParaSite-Compara, HGNC:MPP3|ParaSite-Compara	Is an ortholog of human CASK (calcium\/calmodulin dependent serine protein kinase). Exhibits insulin-like growth factor receptor binding activity. Is involved in several processes, including oviposition\; positive regulation of vulval development\; and protein localization to membrane. Localizes to cell junction. Is expressed in CAN\; HSN\; body wall musculature\; and nerve ring. Is used to study…
WBGene00008599	F09A5.2	F09A5.2	HGNC:STYK1|TreeFam;EnsEMBL-Compara, HGNC:FLT4|ParaSite-Compara, HGNC:EPHA3|ParaSite-Compara, HGNC:EPHA10|ParaSite-Compara, HGNC:AXL|ParaSite-Compara, HGNC:EPHB6|ParaSite-Compara, HGNC:ALK|ParaSite-Compara, HGNC:NTRK2|ParaSite-Compara, HGNC:INSRR|ParaSite-Compara, HGNC:EPHA6|ParaSite-Compara, HGNC:PDGFRA|ParaSite-Compara, HGNC:LMTK2|ParaSite-Compara, HGNC:DDR1|ParaSite-Compara, HGNC:NTRK1|ParaSite…	Is predicted to have transmembrane receptor protein tyrosine kinase activity. Human ortholog(s) of this gene are implicated in several diseases, including bone development disease (multiple)\; gastrointestinal system cancer (multiple)\; and hematologic cancer (multiple).
WBGene00010692	K08H2.5	K08H2.5	N.A.	Is predicted to have protein serine\/threonine kinase activity.
WBGene00004719	sad-1	F15A2.6	HGNC:BRSK1|OrthoInspector;EnsEMBL-Compara;PhylomeDB;Hieranoid;Panther;Roundup;TreeFam;Inparanoid;OrthoFinder;OMA, HGNC:BRSK2|EnsEMBL-Compara;OrthoInspector;PhylomeDB;Hieranoid;Panther;TreeFam;OrthoFinder;Inparanoid;OMA;ParaSite-Compara, HGNC:TSSK2|ParaSite-Compara, HGNC:NUAK1|ParaSite-Compara, HGNC:NUAK2|ParaSite-Compara, HGNC:HUNK|ParaSite-Compara, HGNC:TSSK6|ParaSite-Compara	Is an ortholog of human BRSK1 (BR serine\/threonine kinase 1) and BRSK2 (BR serine\/threonine kinase 2). Exhibits tau-protein kinase activity. Is involved in several processes, including nervous system development\; peptidyl-serine phosphorylation\; and synaptic vesicle transport. Localizes to axon and dendrite. Is expressed in nervous system.
WBGene00000406	cdk-4	F18H3.5	HGNC:CDK4|EnsEMBL-Compara;OrthoInspector;PhylomeDB;Hieranoid;Panther;TreeFam;OMA;OrthoFinder;ParaSite-Compara, HGNC:CDK6|OrthoInspector;EnsEMBL-Compara;PhylomeDB;Hieranoid;Panther;TreeFam;OMA;OrthoFinder;ParaSite-Compara, HGNC:CDKL4|ParaSite-Compara, HGNC:CDK15|ParaSite-Compara, HGNC:CDKL2|ParaSite-Compara, HGNC:CDK14|ParaSite-Compara, HGNC:CDKL3|ParaSite-Compara	Is an ortholog of human CDK4 (cyclin dependent kinase 4) and CDK6 (cyclin dependent kinase 6). Exhibits protein serine\/threonine kinase activity. Is involved in several processes, including cellular protein modification process\; gonad development\; and positive regulation of cell cycle process. Is expressed in gonad\; intestine\; neurons\; and vulva. Is used to study cancer. Human ortholog(s) o…
WBGene00003848	odr-1	R01E6.1	HGNC:GUCY2F|Panther;TreeFam;EnsEMBL-Compara, HGNC:GUCY2D|Panther;TreeFam;EnsEMBL-Compara	Is an ortholog of human GUCY2D (guanylate cyclase 2D, retinal) and GUCY2F (guanylate cyclase 2F, retinal). Is predicted to have ATP binding activity and protein kinase activity. Is expressed in I1 neuron and odorsensory neurons.
WBGene00007287	gck-4	C04A11.3	HGNC:STK10|OrthoInspector;EnsEMBL-Compara;PhylomeDB;Hieranoid;Panther;Roundup;TreeFam;Inparanoid;OrthoFinder;OMA, HGNC:SLK|OrthoInspector;EnsEMBL-Compara;PhylomeDB;Panther;Roundup;TreeFam;OrthoFinder;OMA;Hieranoid;ParaSite-Compara, HGNC:SBK2|ParaSite-Compara, HGNC:TAOK3|ParaSite-Compara, HGNC:MAP2K3|ParaSite-Compara, HGNC:MAP3K8|ParaSite-Compara, HGNC:OXSR1|ParaSite-Compara, HGNC:MAP2K6|ParaSite-…	Is an ortholog of human SLK (STE20 like kinase) and STK10 (serine\/threonine kinase 10). Is predicted to have protein serine\/threonine kinase activity. Is expressed in head and tail. Human ortholog(s) of this gene are implicated in lung cancer.
WBGene00008881	F16B12.5	F16B12.5	N.A.	Is affected by several genes including daf-16\; daf-12\; and eat-2 based on tiling array\; RNA-seq\; and microarray studies. Is affected by four chemicals including Rifampin\; Psoralens\; and Sirolimus based on RNA-seq and microarray studies.
WBGene00010555	K04C1.5	K04C1.5	N.A.	Is predicted to have protein serine\/threonine kinase activity.
WBGene00006517	madd-3	E02H4.3	HGNC:CLK4|EnsEMBL-Compara;OrthoInspector;PhylomeDB;Panther;Roundup;TreeFam;OrthoFinder, HGNC:CLK1|OrthoInspector;PhylomeDB;Panther;Roundup;TreeFam;OrthoFinder, HGNC:CLK2|EnsEMBL-Compara;OrthoInspector;PhylomeDB;Panther;Roundup;TreeFam;OrthoFinder;ParaSite-Compara, HGNC:CLK3|EnsEMBL-Compara;OrthoInspector;PhylomeDB;Panther;Roundup;TreeFam;OrthoFinder	Is an ortholog of human CLK2 (CDC like kinase 2). Is predicted to have ATP binding activity\; protein serine\/threonine kinase activity\; and protein tyrosine kinase activity. Is expressed in anal depressor muscle\; anal sphincter muscle\; body wall musculature\; and vulval muscle.
WBGene00008464	E02H4.6	E02H4.6	N.A.	Is predicted to have protein serine\/threonine kinase activity.
WBGene00008095	C44H4.6	C44H4.6	HGNC:GSK3B|TreeFam;Panther;OrthoFinder, HGNC:CDKL4|ParaSite-Compara, HGNC:CDK4|ParaSite-Compara, HGNC:CDK6|ParaSite-Compara, HGNC:CDK15|ParaSite-Compara, HGNC:CDKL2|ParaSite-Compara, HGNC:CDK8|ParaSite-Compara, HGNC:CDKL3|ParaSite-Compara, HGNC:CDK14|ParaSite-Compara	Is an ortholog of human GSK3B (glycogen synthase kinase 3 beta). Is predicted to have protein serine\/threonine kinase activity. Human ortholog(s) of this gene are implicated in primary autosomal recessive microcephaly 12.
WBGene00003149	mbk-1	T04C10.1	HGNC:DYRK1A|EnsEMBL-Compara;OrthoInspector;PhylomeDB;Roundup;TreeFam;OrthoFinder;Inparanoid;Hieranoid;ParaSite-Compara, HGNC:DYRK1B|EnsEMBL-Compara;OrthoInspector;PhylomeDB;Panther;Roundup;TreeFam;Inparanoid;OrthoFinder;Hieranoid, HGNC:DYRK3|ParaSite-Compara, HGNC:HIPK4|ParaSite-Compara, HGNC:CLK4|ParaSite-Compara	Is an ortholog of human DYRK1A (dual specificity tyrosine phosphorylation regulated kinase 1A) and DYRK1B (dual specificity tyrosine phosphorylation regulated kinase 1B). Is predicted to have protein serine\/threonine kinase activity and transcription coactivator activity. Is expressed in several structures, including anterior gonad arm. Is used to study Down syndrome. Human ortholog(s) of this g…
WBGene00002203	kin-20	F46F2.2	HGNC:CSNK1D|OrthoInspector;EnsEMBL-Compara;PhylomeDB;Hieranoid;Roundup;Inparanoid;OrthoFinder;OMA;ParaSite-Compara, HGNC:TPTEP2-CSNK1E|OrthoInspector;PhylomeDB;Panther;Roundup;Inparanoid;OrthoFinder;ParaSite-Compara, HGNC:CSNK1E|ParaSite-Compara	Is an ortholog of human CSNK1D (casein kinase 1 delta). Is predicted to have protein serine\/threonine kinase activity. Is expressed in HSNL\; HSNR\; and seam cell. Human ortholog(s) of this gene are implicated in advanced sleep phase syndrome 2.
WBGene00010700	nipi-3	K09A9.1	HGNC:TRIB2|EnsEMBL-Compara;Panther, HGNC:TRIB1|Panther;EnsEMBL-Compara, HGNC:TRIB3|Panther;EnsEMBL-Compara, HGNC:MKNK1|ParaSite-Compara, HGNC:CAMK4|ParaSite-Compara, HGNC:DCX|ParaSite-Compara, HGNC:MAPKAPK2|ParaSite-Compara	Is predicted to have mitogen-activated protein kinase kinase binding activity. Is involved in defense response to fungus and positive regulation of gene expression. Is expressed in CAN\; hypodermis\; motor neurons\; pharynx\; and touch receptor neurons. Human ortholog(s) of this gene are implicated in lissencephaly.
WBGene00018187	twf-2	F38E9.5	HGNC:TWF2|OrthoInspector;EnsEMBL-Compara;PhylomeDB;Hieranoid;Panther;Roundup;Inparanoid;OrthoFinder;OMA;ParaSite-Compara, HGNC:TWF1|EnsEMBL-Compara;OrthoInspector;PhylomeDB;Hieranoid;Panther;Roundup;Inparanoid;OrthoFinder;OMA;ParaSite-Compara	Is an ortholog of human TWF1 (twinfilin actin binding protein 1) and TWF2 (twinfilin actin binding protein 2). Is predicted to have actin filament binding activity and actin monomer binding activity. Is expressed in hypodermis and intestine.
WBGene00017729	F22H10.5	F22H10.5	HGNC:HASPIN|OrthoInspector;Roundup;PhylomeDB	Is an ortholog of human HASPIN (histone H3 associated protein kinase).
WBGene00020142	aak-2	T01C8.1	HGNC:PRKAA2|EnsEMBL-Compara;OrthoInspector;PhylomeDB;Hieranoid;Panther;Roundup;TreeFam;OrthoFinder;OMA;Inparanoid, HGNC:PRKAA1|OrthoInspector;EnsEMBL-Compara;PhylomeDB;Hieranoid;Panther;Roundup;TreeFam;OrthoFinder;OMA;Inparanoid, HGNC:TSSK2|ParaSite-Compara, HGNC:TSSK3|ParaSite-Compara, HGNC:BRSK2|ParaSite-Compara, HGNC:HUNK|ParaSite-Compara, HGNC:NUAK1|ParaSite-Compara, HGNC:TSSK6|ParaSite-Compa…	Is an ortholog of human PRKAA1 (protein kinase AMP-activated catalytic subunit alpha 1) and PRKAA2 (protein kinase AMP-activated catalytic subunit alpha 2). Exhibits AMP-activated protein kinase activity. Is involved in several processes, including determination of adult lifespan\; positive regulation of dauer larval development\; and regulation of protein secretion. Localizes to axon\; cytoplasm…
WBGene00001537	gcy-11	C30G4.3	N.A.	Is predicted to have guanylate cyclase activity and peptide receptor activity. Is expressed in pharyngeal muscle cell.
WBGene00000410	cdk-9	H25P06.2	HGNC:CDK9|OrthoInspector;PhylomeDB;Hieranoid;Panther;Roundup;TreeFam;Inparanoid;OrthoFinder;OMA;EnsEMBL-Compara;ParaSite-Compara	Is an ortholog of human CDK9 (cyclin dependent kinase 9). Is predicted to have several functions, including cyclin binding activity\; kinase activity\; and transcription factor binding activity. Is involved in several processes, including germ cell development\; nematode larval development\; and regulation of protein modification process. Localizes to chromosome. Is expressed in several structure…
WBGene00002189	kin-1	ZK909.2	HGNC:PRKACG|EnsEMBL-Compara;OrthoInspector;PhylomeDB;Hieranoid;Panther;TreeFam;Inparanoid;OrthoFinder, HGNC:PRKACA|OrthoInspector;EnsEMBL-Compara;PhylomeDB;Hieranoid;Panther;Roundup;TreeFam;Inparanoid;OMA;OrthoFinder, HGNC:PRKACB|OrthoInspector;EnsEMBL-Compara;PhylomeDB;Hieranoid;Panther;Roundup;TreeFam;Inparanoid;OMA;OrthoFinder	Is an ortholog of human PRKACA (protein kinase cAMP-activated catalytic subunit alpha) and PRKACB (protein kinase cAMP-activated catalytic subunit beta). Exhibits cAMP-dependent protein kinase activity. Is involved in positive regulation of oocyte maturation and protein phosphorylation. Is expressed in several structures, including excretory cell\; gonad\; head muscle\; intestine\; and ventral co…
WBGene00021214	hasp-2	Y18H1A.10	HGNC:HASPIN|OrthoInspector;EnsEMBL-Compara;PhylomeDB;Panther;Roundup;TreeFam;OrthoFinder, HGNC:IRAK2|ParaSite-Compara, HGNC:IRAK3|ParaSite-Compara, HGNC:IRAK1|ParaSite-Compara	Is an ortholog of human HASPIN (histone H3 associated protein kinase). Is predicted to have histone kinase activity (H3-T3 specific).
WBGene00021461	nekl-1	Y39G10AR.3	ENSG00000160602|EnsEMBL-Compara;OrthoInspector;PhylomeDB;Hieranoid;Panther;Inparanoid, HGNC:NEK9|OrthoInspector;PhylomeDB;Hieranoid;TreeFam;Inparanoid;OrthoFinder;OMA, HGNC:NEK3|ParaSite-Compara	Is an ortholog of human NEK9 (NIMA related kinase 9). Is predicted to have protein serine\/threonine kinase activity. Is expressed in amphid neurons and lumbar neurons.
WBGene00021635	Y47G6A.5	Y47G6A.5	HGNC:HCK|Panther;OrthoFinder;PhylomeDB, HGNC:LCK|Panther;OrthoFinder;PhylomeDB, HGNC:FGR|Panther;OrthoFinder;PhylomeDB, HGNC:FYN|Panther;OrthoFinder;PhylomeDB, HGNC:YES1|Panther;OrthoFinder;PhylomeDB, HGNC:BLK|Panther;OrthoFinder;PhylomeDB, HGNC:SRC|Panther;OrthoFinder;PhylomeDB, HGNC:LYN|Panther;OrthoFinder;PhylomeDB	Is an ortholog of several human genes including FGR (FGR proto-oncogene, Src family tyrosine kinase)\; HCK (HCK proto-oncogene, Src family tyrosine kinase)\; and LCK (LCK proto-oncogene, Src family tyrosine kinase). Is predicted to have non-membrane spanning protein tyrosine kinase activity and signaling receptor binding activity.
WBGene00021639	Y47G6A.13	Y47G6A.13	N.A.	Is predicted to have protein serine\/threonine kinase activity.
WBGene00000227	atm-1	Y48G1BL.2	HGNC:ATM|EnsEMBL-Compara;Panther;Roundup;OrthoInspector;OrthoFinder;ParaSite-Compara, HGNC:PRKDC|ParaSite-Compara	Is an ortholog of human ATM (ATM serine\/threonine kinase). Is predicted to have protein serine\/threonine kinase activity. Is involved in response to ionizing radiation. Localizes to chromatin. Is used to study ataxia telangiectasia. Human ortholog(s) of this gene are implicated in ataxia telangiectasia and breast cancer.
WBGene00003186	mek-2	Y54E10BL.6	HGNC:MAP2K1|OrthoInspector;EnsEMBL-Compara;PhylomeDB;Hieranoid;Panther;Roundup;TreeFam;OrthoFinder;Inparanoid;OMA;ParaSite-Compara, HGNC:MAP2K2|OrthoInspector;EnsEMBL-Compara;PhylomeDB;Hieranoid;Panther;Roundup;TreeFam;OrthoFinder;Inparanoid;OMA;ParaSite-Compara, ENSG00000230626|ParaSite-Compara	Is an ortholog of human MAP2K1 (mitogen-activated protein kinase kinase 1) and MAP2K2 (mitogen-activated protein kinase kinase 2). Exhibits MAP kinase kinase activity and scaffold protein binding activity. Is involved in defense response to Gram-positive bacterium\; intracellular signal transduction\; and vulval development. Human ortholog(s) of this gene are implicated in Noonan syndrome 1\; car…
WBGene00022032	Y65B4A.9	Y65B4A.9	N.A.	Is predicted to have protein serine\/threonine kinase activity.
WBGene00019190	H12I13.1	H12I13.1	N.A.	Is predicted to have ATP binding activity\; protein kinase activity\; and thiol-dependent ubiquitinyl hydrolase activity.
WBGene00012586	Y38E10A.8	Y38E10A.8	HGNC:EIF2AK2|TreeFam;Roundup;PhylomeDB;Hieranoid;ParaSite-Compara, HGNC:EIF2AK3|OrthoInspector;EnsEMBL-Compara;PhylomeDB;Panther;Roundup	Is an ortholog of human EIF2AK2 (eukaryotic translation initiation factor 2 alpha kinase 2) and EIF2AK3 (eukaryotic translation initiation factor 2 alpha kinase 3). Is predicted to have eukaryotic translation initiation factor 2alpha kinase activity.
WBGene00012726	Y39G8B.5	Y39G8B.5	HGNC:TBK1|OrthoInspector;EnsEMBL-Compara;OrthoFinder, HGNC:IKBKE|EnsEMBL-Compara;OrthoInspector;OrthoFinder, HGNC:SBK3|ParaSite-Compara, HGNC:SBK1|ParaSite-Compara	Is an ortholog of human IKBKE (inhibitor of nuclear factor kappa B kinase subunit epsilon) and TBK1 (TANK binding kinase 1). Is predicted to have protein serine\/threonine kinase activity.
WBGene00006993	zyg-8	Y79H2A.11	HGNC:DCX|EnsEMBL-Compara;OrthoInspector;PhylomeDB;TreeFam;OrthoFinder, HGNC:DCLK1|EnsEMBL-Compara;OrthoInspector;PhylomeDB;Hieranoid;Roundup;TreeFam;OrthoFinder;Inparanoid;OMA;ParaSite-Compara, HGNC:DCLK2|EnsEMBL-Compara;OrthoInspector;PhylomeDB;Hieranoid;TreeFam;Inparanoid;OrthoFinder;OMA;ParaSite-Compara, HGNC:CAMK1G|ParaSite-Compara, HGNC:MYLK2|ParaSite-Compara, HGNC:CAMKK2|ParaSite-Compara, H…	Is an ortholog of human DCLK1 (doublecortin like kinase 1). Exhibits microtubule binding activity. Is involved in establishment of mitotic spindle localization and negative regulation of microtubule depolymerization. Localizes to centrosome and cytoplasm. Colocalizes with spindle microtubule and spindle pole. Is expressed in germ line\; gonad\; hypodermis\; neurons\; and ventral nerve cord. Human…
WBGene00013727	Y111B2A.1	Y111B2A.1	HGNC:HIPK2|ParaSite-Compara, HGNC:CLK3|ParaSite-Compara, HGNC:DYRK3|ParaSite-Compara, HGNC:HIPK1|ParaSite-Compara, HGNC:DYRK1B|ParaSite-Compara, HGNC:CLK4|ParaSite-Compara, HGNC:DYRK1A|ParaSite-Compara, HGNC:HIPK4|ParaSite-Compara, HGNC:DYRK2|ParaSite-Compara	Is predicted to have ATP binding activity and protein serine\/threonine kinase activity. Human ortholog(s) of this gene are implicated in abdominal obesity-metabolic syndrome 3 and autosomal dominant non-syndromic intellectual disability 7.
WBGene00000898	daf-2	Y55D5A.5	HGNC:INSR|EnsEMBL-Compara;OrthoInspector;PhylomeDB;Hieranoid;Panther;Roundup;TreeFam;OrthoFinder;Inparanoid;OMA, HGNC:INSRR|EnsEMBL-Compara;OrthoInspector;PhylomeDB;Hieranoid;Panther;TreeFam;OrthoFinder;Inparanoid;OMA;ParaSite-Compara, HGNC:IGF1R|EnsEMBL-Compara;OrthoInspector;PhylomeDB;Hieranoid;Panther;Roundup;TreeFam;OrthoFinder;Inparanoid;OMA, HGNC:FLT4|ParaSite-Compara, HGNC:EPHA10|ParaSite-…	Is an ortholog of human IGF1R (insulin like growth factor 1 receptor)\; INSR (insulin receptor)\; and INSRR (insulin receptor related receptor). Exhibits PTB domain binding activity\; SH2 domain binding activity\; and protein kinase binding activity. Is involved in several processes, including dauer exit\; regulation of cellular catabolic process\; and regulation of gene expression. Localizes to …
WBGene00006599	tpa-1	B0545.1	HGNC:PRKCQ|OrthoInspector;EnsEMBL-Compara;PhylomeDB;Hieranoid;Panther;Roundup;TreeFam;Inparanoid;OrthoFinder;OMA, HGNC:PRKCD|OrthoInspector;EnsEMBL-Compara;PhylomeDB;Hieranoid;Panther;Roundup;TreeFam;OrthoFinder;Inparanoid;OMA, HGNC:PRKCA|ParaSite-Compara, HGNC:PKN3|ParaSite-Compara	Is an ortholog of human PRKCD (protein kinase C delta) and PRKCQ (protein kinase C theta). Exhibits mitogen-activated protein kinase kinase kinase binding activity and protein serine\/threonine kinase activity. Is involved in several processes, including defense response to other organism\; positive regulation of axon regeneration\; and positive regulation of macromolecule metabolic process. Is e…
WBGene00021793	Y52D5A.2	Y52D5A.2	HGNC:FES|TreeFam;Panther;PhylomeDB;EnsEMBL-Compara;OrthoFinder, HGNC:FER|TreeFam;Panther;PhylomeDB;EnsEMBL-Compara;OrthoFinder	Is an ortholog of human FER (FER tyrosine kinase) and FES (FES proto-oncogene, tyrosine kinase). Is predicted to have ATP binding activity and non-membrane spanning protein tyrosine kinase activity.
WBGene00022229	Y73B6A.2	Y73B6A.2	N.A.	Is enriched in male based on RNA-seq studies. Is affected by several genes including daf-2\; eat-2\; and pmk-1 based on tiling array\; RNA-seq\; and microarray studies. Is affected by six chemicals including methylmercuric chloride\; Tunicamycin\; and multi-walled carbon nanotube based on microarray and RNA-seq studies.
WBGene00022228	Y73B6A.1	Y73B6A.1	HGNC:HASPIN|Panther;OrthoFinder;PhylomeDB	Is an ortholog of human HASPIN (histone H3 associated protein kinase). Is predicted to have histone kinase activity (H3-T3 specific).
WBGene00013355	gck-3	Y59A8B.23	HGNC:OXSR1|EnsEMBL-Compara;OrthoInspector;PhylomeDB;Hieranoid;Panther;Roundup;Inparanoid;OrthoFinder;OMA, HGNC:STK39|EnsEMBL-Compara;OrthoInspector;PhylomeDB;Hieranoid;Panther;Roundup;Inparanoid;OrthoFinder;OMA;ParaSite-Compara	Is an ortholog of human STK39 (serine\/threonine kinase 39). Exhibits protein kinase binding activity and protein serine\/threonine kinase activity. Is involved in several processes, including cellular protein modification process\; multicellular organismal water homeostasis\; and positive regulation of transcription from RNA polymerase II promoter in response to increased salt. Localizes to cyto…
WBGene00000498	chk-1	Y39H10A.7	HGNC:CHEK1|OrthoInspector;PhylomeDB;Hieranoid;Panther;Roundup;OrthoFinder;Inparanoid;OMA, HGNC:CAMKV|ParaSite-Compara, HGNC:PNCK|ParaSite-Compara, HGNC:MYLK2|ParaSite-Compara, HGNC:CAMK1G|ParaSite-Compara, HGNC:DCLK2|ParaSite-Compara, HGNC:CAMK2B|ParaSite-Compara, HGNC:PHKG2|ParaSite-Compara, HGNC:DCLK1|ParaSite-Compara, HGNC:PHKG1|ParaSite-Compara	Is an ortholog of human CHEK1 (checkpoint kinase 1). Is predicted to have protein serine\/threonine kinase activity. Is involved in embryo development and mitotic DNA replication checkpoint. Is expressed in germ line. Human ortholog(s) of this gene are implicated in autosomal dominant mental retardation 54\; glycogen storage disease IXc\; and hypertrophic cardiomyopathy 1.
WBGene00003965	pdk-1	H42K12.1	HGNC:PDPK1|EnsEMBL-Compara;OrthoInspector;PhylomeDB;Hieranoid;Panther;Roundup;TreeFam;Inparanoid;OrthoFinder;OMA;ParaSite-Compara	Is an ortholog of human PDPK1 (3-phosphoinositide dependent protein kinase 1). Exhibits protein kinase activity. Is involved in several processes, including dauer larval development\; learning or memory\; and regulation of synaptic growth at neuromuscular junction. Localizes to axon\; neuronal cell body\; and nucleus. Is expressed in several structures, including gonad\; intestine\; neurons\; pha…
WBGene00004033	pkc-2	E01H11.1	HGNC:PRKCB|EnsEMBL-Compara;OrthoInspector;PhylomeDB;Hieranoid;Roundup;TreeFam;Inparanoid;OrthoFinder;OMA;Panther, HGNC:PRKCA|EnsEMBL-Compara;OrthoInspector;PhylomeDB;Hieranoid;Panther;Roundup;TreeFam;OrthoFinder;Inparanoid;OMA;ParaSite-Compara, HGNC:PRKCG|EnsEMBL-Compara;PhylomeDB;Hieranoid;Panther;TreeFam;OrthoFinder;Inparanoid;OMA, HGNC:PKN3|ParaSite-Compara	Is an ortholog of human PRKCA (protein kinase C alpha). Exhibits calcium-dependent protein kinase C activity. Is involved in peptidyl-serine phosphorylation. Localizes to several cellular components, including cytosol\; neuron projection\; and neuronal cell body. Is expressed in body wall musculature\; intestine\; neurons\; somatic nervous system\; and tail ganglion.
WBGene00002191	kin-3	B0205.7	HGNC:CSNK2A1|OrthoInspector;EnsEMBL-Compara;PhylomeDB;Hieranoid;Panther;Roundup;TreeFam;Inparanoid;OrthoFinder;OMA;ParaSite-Compara, HGNC:CSNK2A2|OrthoInspector;PhylomeDB;Roundup;TreeFam;OrthoFinder;OMA;EnsEMBL-Compara, HGNC:CSNK2A3|EnsEMBL-Compara;Panther;Inparanoid;OrthoFinder;OMA;ParaSite-Compara	Is an ortholog of human CSNK2A1 (casein kinase 2 alpha 1). Exhibits protein serine\/threonine kinase activity. Is involved in peptidyl-serine phosphorylation\; response to hermaphrodite contact\; and vulval location. Localizes to several cellular components, including neuronal cell body\; non-motile cilium\; and protein kinase CK2 complex.
WBGene00004055	pmk-1	B0218.3	HGNC:MAPK14|EnsEMBL-Compara;OrthoInspector;PhylomeDB;Hieranoid;Panther;Roundup;TreeFam;OrthoFinder;Inparanoid;OMA, HGNC:MAPK11|OrthoInspector;EnsEMBL-Compara;PhylomeDB;Hieranoid;Roundup;TreeFam;OrthoFinder;Inparanoid;OMA;Panther, HGNC:MAPK12|EnsEMBL-Compara;PhylomeDB;Hieranoid;Panther;TreeFam;OrthoFinder;ParaSite-Compara, HGNC:MAPK13|EnsEMBL-Compara;PhylomeDB;Hieranoid;Panther;TreeFam;OrthoFinder…	Is an ortholog of human MAPK11 (mitogen-activated protein kinase 11) and MAPK14 (mitogen-activated protein kinase 14). Exhibits MAP kinase activity\; molecular function regulator\; and transcription factor binding activity. Is involved in several processes, including behavioral response to nicotine\; cellular protein modification process\; and defense response to other organism. Localizes to cyto…
WBGene00000103	akt-2	F28H6.1	HGNC:AKT1|EnsEMBL-Compara;OrthoInspector;PhylomeDB;Hieranoid;Panther;Roundup;OrthoFinder;Inparanoid;OMA, HGNC:AKT3|EnsEMBL-Compara;OrthoInspector;PhylomeDB;Hieranoid;Panther;Roundup;TreeFam;Inparanoid;OrthoFinder;OMA, HGNC:AKT2|OrthoInspector;EnsEMBL-Compara;PhylomeDB;Hieranoid;Panther;Roundup;TreeFam;Inparanoid;OrthoFinder;OMA, HGNC:PRKCD|ParaSite-Compara, HGNC:PRKCQ|ParaSite-Compara	Is an ortholog of human AKT2 (AKT serine\/threonine kinase 2) and AKT3 (AKT serine\/threonine kinase 3). Exhibits phosphatidylinositol-3,4,5-trisphosphate binding activity and protein serine\/threonine kinase activity. Is involved in several processes, including cellular protein modification process\; determination of adult lifespan\; and insulin receptor signaling pathway. Is expressed in severa…
WBGene00002177	jkk-1	F35C8.3	HGNC:MAP2K7|TreeFam;EnsEMBL-Compara;PhylomeDB;Panther;OrthoFinder, HGNC:NEK1|ParaSite-Compara, HGNC:MAP3K2|ParaSite-Compara, HGNC:MAP3K4|ParaSite-Compara, HGNC:MAP3K3|ParaSite-Compara, HGNC:MAP2K5|ParaSite-Compara	Is an ortholog of human MAP2K7 (mitogen-activated protein kinase kinase 7). Exhibits JUN kinase kinase activity. Is involved in activation of JUN kinase activity\; hyperosmotic response\; and locomotion. Localizes to axon\; cytoplasm\; and neuronal cell body. Is expressed in neurons. Human ortholog(s) of this gene are implicated in short-rib thoracic dysplasia 6 with or without polydactyly.
WBGene00000099	air-2	B0207.4	HGNC:AURKB|EnsEMBL-Compara;OrthoInspector;PhylomeDB;Hieranoid;Panther;Roundup;Inparanoid;OrthoFinder;OMA;ParaSite-Compara, HGNC:AURKA|OrthoInspector;EnsEMBL-Compara;PhylomeDB;Hieranoid;Panther;TreeFam;Inparanoid;OrthoFinder;OMA, HGNC:AURKC|EnsEMBL-Compara;OrthoInspector;PhylomeDB;Hieranoid;Panther;Roundup;TreeFam;Inparanoid;OrthoFinder;OMA	Is an ortholog of human AURKB (aurora kinase B) and AURKC (aurora kinase C). Exhibits ATPase binding activity\; kinesin binding activity\; and protein serine\/threonine kinase activity. Is involved in several processes, including cellular protein modification process\; regulation of actomyosin contractile ring contraction\; and spindle midzone assembly. Localizes to condensed nuclear chromosome a…
WBGene00002178	jnk-1	B0478.1	HGNC:MAPK9|EnsEMBL-Compara;OrthoInspector;PhylomeDB;Hieranoid;TreeFam;Inparanoid;OrthoFinder;OMA;Panther, HGNC:MAPK8|EnsEMBL-Compara;OrthoInspector;PhylomeDB;Hieranoid;Roundup;TreeFam;OrthoFinder;Inparanoid;OMA;Panther, HGNC:MAPK10|EnsEMBL-Compara;OrthoInspector;PhylomeDB;Hieranoid;Panther;Roundup;TreeFam;Inparanoid;OrthoFinder;OMA, HGNC:MAPK4|ParaSite-Compara, HGNC:NLK|ParaSite-Compara	Is an ortholog of human MAPK10 (mitogen-activated protein kinase 10) and MAPK8 (mitogen-activated protein kinase 8). Exhibits JUN kinase activity and transcription factor binding activity. Is involved in several processes, including JUN phosphorylation\; negative regulation of cellular response to manganese ion\; and vesicle transport along actin filament. Localizes to several cellular components…
WBGene00002200	kin-16	M176.7	HGNC:KIT|Panther;OrthoInspector;EnsEMBL-Compara;ParaSite-Compara, HGNC:PDGFRA|Panther;OrthoInspector;EnsEMBL-Compara;ParaSite-Compara, HGNC:PDGFRB|EnsEMBL-Compara;OrthoInspector;Panther;ParaSite-Compara, HGNC:CSF1R|Panther;OrthoInspector;EnsEMBL-Compara;ParaSite-Compara, HGNC:FLT3|EnsEMBL-Compara;OrthoInspector;Panther;ParaSite-Compara, HGNC:FLT4|ParaSite-Compara, HGNC:EPHA10|ParaSite-Compara, HG…	Is an ortholog of several human genes including CSF1R (colony stimulating factor 1 receptor)\; KIT (KIT proto-oncogene, receptor tyrosine kinase)\; and PDGFRA (platelet derived growth factor receptor alpha). Is predicted to have transmembrane receptor protein tyrosine kinase activity. Is expressed in hyp6 and hyp7 syncytium. Human ortholog(s) of this gene are implicated in several diseases, inclu…
WBGene00000499	chk-2	Y60A3A.12	HGNC:CHEK2|OrthoInspector;EnsEMBL-Compara;PhylomeDB;Hieranoid;Panther;TreeFam;OrthoFinder;Inparanoid;OMA;ParaSite-Compara	Is an ortholog of human CHEK2 (checkpoint kinase 2). Is predicted to have protein serine\/threonine kinase activity. Is involved in positive regulation of histone H3-K9 methylation. Human ortholog(s) of this gene are implicated in several diseases, including Li-Fraumeni syndrome 2\; osteosarcoma\; and prostate cancer.
WBGene00006786	unc-51	Y60A3A.1	HGNC:ULK1|EnsEMBL-Compara;OrthoInspector;PhylomeDB;Hieranoid;Panther;Roundup;Inparanoid;OrthoFinder, HGNC:ULK2|EnsEMBL-Compara;OrthoInspector;PhylomeDB;Hieranoid;Panther;Roundup;Inparanoid;OrthoFinder;ParaSite-Compara	Is an ortholog of human ULK2 (unc-51 like autophagy activating kinase 2). Exhibits protein kinase activity. Is involved in several processes, including autophagy\; generation of neurons\; and nematode male tail tip morphogenesis. Localizes to axon and neuronal cell body. Is expressed in body wall musculature\; motor neurons\; and pharyngeal muscle cell.
WBGene00006794	unc-60	C38C3.5	HGNC:CFL1|PhylomeDB;Hieranoid;Panther;Roundup;Inparanoid;OrthoFinder;EnsEMBL-Compara;OrthoInspector;OMA;ParaSite-Compara, HGNC:CFL2|PhylomeDB;Hieranoid;Panther;Roundup;Inparanoid;OrthoFinder;OrthoInspector;EnsEMBL-Compara;OMA;ParaSite-Compara, HGNC:DSTN|PhylomeDB;Hieranoid;Panther;Roundup;Inparanoid;OrthoFinder;OrthoInspector;EnsEMBL-Compara;OMA;ParaSite-Compara	Is an ortholog of human CFL1 (cofilin 1)\; CFL2 (cofilin 2)\; and DSTN (destrin, actin depolymerizing factor). Exhibits actin filament binding activity. Is involved in several processes, including actin filament organization\; actin filament severing\; and positive regulation of actin filament polymerization. Localizes to ribonucleoprotein complex and striated muscle thin filament. Is expressed i…
WBGene00022102	Y69F12A.1	Y69F12A.1	N.A.	Is predicted to have protein serine\/threonine kinase activity.
WBGene00021753	Y50D7A.3	Y50D7A.3	HGNC:PHKG2|EnsEMBL-Compara;OrthoInspector;PhylomeDB;Hieranoid;Panther;Roundup;OrthoFinder;Inparanoid;ParaSite-Compara, HGNC:PHKG1|EnsEMBL-Compara;OrthoInspector;PhylomeDB;Hieranoid;Panther;Roundup;Inparanoid;OrthoFinder;OMA, HGNC:CAMKV|ParaSite-Compara, HGNC:MYLK2|ParaSite-Compara, HGNC:CAMK1G|ParaSite-Compara, HGNC:DCLK2|ParaSite-Compara, HGNC:DCLK1|ParaSite-Compara	Is an ortholog of human PHKG1 (phosphorylase kinase catalytic subunit gamma 1) and PHKG2 (phosphorylase kinase catalytic subunit gamma 2). Is predicted to have ATP binding activity\; calmodulin binding activity\; and phosphorylase kinase activity. Human ortholog(s) of this gene are implicated in glycogen storage disease IXc and hypertrophic cardiomyopathy 1.
WBGene00018004	F33D11.7	F33D11.7	N.A.	Is predicted to have protein serine\/threonine kinase activity.
WBGene00019911	R06A10.4	R06A10.4	HGNC:PSKH2|EnsEMBL-Compara;OrthoInspector;PhylomeDB;Panther;TreeFam;Inparanoid;OMA;OrthoFinder;ParaSite-Compara, HGNC:PSKH1|EnsEMBL-Compara;OrthoInspector;PhylomeDB;Panther;TreeFam;Inparanoid;OrthoFinder;OMA	Is an ortholog of human PSKH2 (protein serine kinase H2). Is predicted to have ATP binding activity and protein serine\/threonine kinase activity.
WBGene00022108	Y71F9AL.2	Y71F9AL.2	N.A.	Is predicted to have protein serine\/threonine kinase activity.
WBGene00002240	ksr-2	F58D5.4	HGNC:KSR2|OrthoInspector;PhylomeDB;Panther;Roundup;TreeFam;OrthoFinder;ParaSite-Compara, HGNC:KSR1|OrthoInspector;PhylomeDB;Panther;Roundup;TreeFam;OrthoFinder;ParaSite-Compara, HGNC:BRAF|ParaSite-Compara, HGNC:MAP3K21|ParaSite-Compara, HGNC:LIMK1|ParaSite-Compara, HGNC:LIMK2|ParaSite-Compara, HGNC:RIPK3|ParaSite-Compara, HGNC:MAP3K13|ParaSite-Compara, HGNC:RIPK1|ParaSite-Compara, HGNC:RIPK2|Para…	Is an ortholog of human KSR1 (kinase suppressor of ras 1) and KSR2 (kinase suppressor of ras 2). Exhibits protein kinase activity. Is involved in several processes, including nematode male tail tip morphogenesis\; positive regulation of vulval development\; and vulval development. Human ortholog(s) of this gene are implicated in several diseases, including LEOPARD syndrome (multiple)\; Noonan syn…
WBGene00022473	bet-1	Y119C1B.8	HGNC:BRD2|OrthoInspector;PhylomeDB;Panther;Roundup;Inparanoid;OrthoFinder;OMA;Hieranoid, HGNC:BRDT|OrthoInspector;PhylomeDB;Panther;Roundup;Inparanoid;OrthoFinder;OMA;Hieranoid, HGNC:BRD3|OrthoInspector;PhylomeDB;Panther;Roundup;Inparanoid;OrthoFinder;OMA;Hieranoid, HGNC:BRD4|OrthoInspector;PhylomeDB;Panther;Inparanoid;OrthoFinder;Hieranoid, HGNC:BAZ2B|ParaSite-Compara	Is an ortholog of human BRD2 (bromodomain containing 2)\; BRD3 (bromodomain containing 3)\; and BRDT (bromodomain testis associated). Exhibits SUMO binding activity and lysine-acetylated histone binding activity. Is involved in several processes, including multicellular organismal locomotion\; muscle cell cellular homeostasis\; and regulation of transcription, DNA-templated. Localizes to chromoso…
WBGene00002213	kin-32	C30F8.4	HGNC:PTK2B|OrthoInspector;PhylomeDB;Hieranoid;Panther;Roundup;OrthoFinder;Inparanoid;EnsEMBL-Compara, HGNC:PTK2|OrthoInspector;EnsEMBL-Compara;PhylomeDB;Hieranoid;Panther;Roundup;Inparanoid;OrthoFinder	Is an ortholog of human PTK2 (protein tyrosine kinase 2) and PTK2B (protein tyrosine kinase 2 beta). Is predicted to have ATP binding activity and protein tyrosine kinase activity. Is expressed in body wall musculature\; head mesodermal cell\; head neurons\; and uterine muscle.
WBGene00012352	dkf-1	W09C5.5	HGNC:PRKD3|Panther;TreeFam;EnsEMBL-Compara;OrthoFinder, HGNC:PRKD1|TreeFam;Panther;OrthoFinder, HGNC:PRKD2|TreeFam;Panther;OrthoFinder	Is an ortholog of human PRKD3 (protein kinase D3). Exhibits protein serine\/threonine kinase activity. Is involved in several processes, including determination of adult lifespan\; positive regulation of protein import into nucleus\; and regulation of defense response to bacterium, incompatible interaction. Localizes to several cellular components, including axon\; dendrite\; and neuronal cell bo…
WBGene00013149	Y53F4B.1	Y53F4B.1	HGNC:MOS|ParaSite-Compara	Is predicted to have ATP binding activity and protein serine\/threonine kinase activity.
WBGene00013091	Y51B9A.9	Y51B9A.9	HGNC:SRPK1|ParaSite-Compara, HGNC:SRPK2|ParaSite-Compara, HGNC:MAPK6|ParaSite-Compara, HGNC:MAPK4|ParaSite-Compara, HGNC:NLK|ParaSite-Compara, HGNC:MAPK9|ParaSite-Compara	Is predicted to have ATP binding activity and protein kinase activity.
WBGene00001173	egl-4	F55A8.2	HGNC:PRKG1|OrthoInspector;EnsEMBL-Compara;Hieranoid;Panther;Roundup;Inparanoid;OMA, HGNC:PRKG2|OMA;EnsEMBL-Compara;Panther;ParaSite-Compara	Is an ortholog of human PRKG1 (protein kinase cGMP-dependent 1). Exhibits cGMP-dependent protein kinase activity. Is involved in several processes, including chemotropism\; larval feeding behavior\; and regulation of signal transduction. Localizes to cytosol and nucleus. Is expressed in several structures, including marginal cell\; nerve ring\; neurons\; spermatheca\; and vulval muscle. Is used t…
WBGene00022707	ZK354.6	ZK354.6	HGNC:TTBK1|Panther;EnsEMBL-Compara;OrthoFinder, HGNC:TTBK2|Panther;EnsEMBL-Compara;OrthoFinder	Is an ortholog of human TTBK1 (tau tubulin kinase 1) and TTBK2 (tau tubulin kinase 2). Is predicted to have protein serine\/threonine kinase activity.
WBGene00014007	ZK596.2	ZK596.2	N.A.	Is predicted to have protein serine\/threonine kinase activity.
WBGene00001540	gcy-14	ZC412.2	HGNC:GUCY2F|Panther;TreeFam;EnsEMBL-Compara, HGNC:GUCY2D|EnsEMBL-Compara;TreeFam;Panther	Is an ortholog of human GUCY2D (guanylate cyclase 2D, retinal) and GUCY2F (guanylate cyclase 2F, retinal). Exhibits identical protein binding activity. Is involved in several processes, including chemosensory behavior\; response to alkaline pH\; and response to lithium ion. Is expressed in ASEL\; AWCL\; AWCR\; and PVT.
WBGene00077712	nipi-4	F40A3.5	N.A.	Is predicted to have ATP binding activity and protein kinase activity. Is involved in defense response to fungus\; positive regulation of gene expression\; and response to wounding. Is expressed in hypodermis.
WBGene00018203	F39F10.3	F39F10.3	N.A.	Is predicted to have protein serine\/threonine kinase activity.
WBGene00013868	ZC373.3	ZC373.3	N.A.	Is predicted to have protein serine\/threonine kinase activity.
WBGene00004789	sgk-1	W10G6.2	HGNC:SGK1|EnsEMBL-Compara;OrthoInspector;PhylomeDB;Hieranoid;Panther;Roundup;TreeFam;Inparanoid;OMA;OrthoFinder, HGNC:SGK2|OrthoInspector;EnsEMBL-Compara;PhylomeDB;Hieranoid;Panther;Roundup;TreeFam;Inparanoid;OrthoFinder;ParaSite-Compara, HGNC:SGK3|ParaSite-Compara	Is an ortholog of human SGK1 (serum\/glucocorticoid regulated kinase 1) and SGK2 (serum\/glucocorticoid regulated kinase 2). Exhibits phosphatidylinositol-3,4,5-trisphosphate binding activity and protein serine\/threonine kinase activity. Is involved in several processes, including mesendoderm development\; peptidyl-serine phosphorylation\; and regulation of protein localization to basolateral pl…
WBGene00009326	F32D8.1	F32D8.1	HGNC:STK33|TreeFam;EnsEMBL-Compara, HGNC:DCLK3|Panther;EnsEMBL-Compara;ParaSite-Compara	Is an ortholog of human DCLK3 (doublecortin like kinase 3). Is predicted to have ATP binding activity and protein serine\/threonine kinase activity.
WBGene00004043	plk-2	Y71F9B.7	HGNC:PLK1|OrthoInspector;EnsEMBL-Compara;PhylomeDB;Hieranoid;Panther;Roundup;Inparanoid;OrthoFinder;OMA, HGNC:PLK5|ParaSite-Compara	Is an ortholog of human PLK1 (polo like kinase 1). Is predicted to have protein serine\/threonine kinase activity. Is involved in regulation of meiosis I. Localizes to cytoplasm. Is expressed in germ line.
WBGene00021315	Y32H12A.7	Y32H12A.7	HGNC:ADCK2|OrthoInspector;EnsEMBL-Compara;PhylomeDB;Hieranoid;Panther;Roundup;Inparanoid;OrthoFinder;OMA;ParaSite-Compara	Is an ortholog of human ADCK2 (aarF domain containing kinase 2). Is predicted to encode a protein with the following domains: ABC1 family\; UbiB domain\; and Protein kinase-like domain superfamily.

## Sheet: ScreenedTXN
WormBase Gene ID	Public Name	Sequence Name	Human Ortholog	Automated Description
WBGene00022837	ceh-45	ZK993.1	HGNC:GSC2|TreeFam;EnsEMBL-Compara;Roundup;OrthoInspector;OrthoFinder;ParaSite-Compara, HGNC:GSC|OrthoInspector;EnsEMBL-Compara;PhylomeDB;Roundup;TreeFam;OrthoFinder;ParaSite-Compara, HGNC:RHOXF1|ParaSite-Compara, HGNC:PROP1|ParaSite-Compara, HGNC:ALX4|ParaSite-Compara, HGNC:PRRX2|ParaSite-Compara, HGNC:OTX1|ParaSite-Compara, HGNC:SEBOX|ParaSite-Compara, HGNC:ALX3|ParaSite-Compara, HGNC:PAX6|ParaS…	Is an ortholog of human GSC (goosecoid homeobox). Is predicted to have DNA-binding transcription factor activity, RNA polymerase II-specific and RNA polymerase II regulatory region sequence-specific DNA binding activity. Is expressed in pharynx and spermatheca. Human ortholog(s) of this gene are implicated in several diseases, including WAGR syndrome\; diabetes mellitus (multiple)\; and eye disea…
WBGene00018786	hmbx-1	F54A5.1	HGNC:HMBOX1|OrthoInspector;EnsEMBL-Compara;PhylomeDB;Hieranoid;Panther;Roundup;TreeFam;OrthoFinder;Inparanoid;OMA;ParaSite-Compara	Is an ortholog of human HMBOX1 (homeobox containing 1). Is predicted to have telomeric DNA binding activity. Localizes to nucleus. Is expressed in body wall musculature\; enteric muscle\; somatic nervous system\; and vulval muscle.
WBGene00022518	zfh-2	ZC123.3	HGNC:ZFHX4|EnsEMBL-Compara;OrthoInspector;Hieranoid;Panther;Roundup;Inparanoid;OrthoFinder, HGNC:ZFHX3|EnsEMBL-Compara;OrthoInspector;PhylomeDB;Hieranoid;Panther;Roundup;Inparanoid;OrthoFinder, HGNC:ZFHX2|EnsEMBL-Compara;OrthoInspector;PhylomeDB;Panther;Inparanoid;ParaSite-Compara	Is an ortholog of human ZFHX3 (zinc finger homeobox 3). Is predicted to have RNA polymerase II cis-regulatory region sequence-specific DNA binding activity. Is expressed in anal depressor muscle\; anal sphincter muscle\; body wall musculature\; nerve ring\; and vulval muscle.
WBGene00022388	Y95B8A.8	Y95B8A.8	HGNC:ZFR2|OrthoInspector;Panther;Inparanoid;OrthoFinder;OMA;Hieranoid, HGNC:ZFR|Roundup;Panther;OrthoInspector;Inparanoid;EnsEMBL-Compara;Hieranoid;OrthoFinder, HGNC:STRBP|Panther;EnsEMBL-Compara;OrthoInspector;OrthoFinder, HGNC:ILF3|Panther;OrthoInspector;EnsEMBL-Compara;OrthoFinder;ParaSite-Compara, HGNC:TARBP2|ParaSite-Compara, HGNC:STAU1|ParaSite-Compara, HGNC:ADARB1|ParaSite-Compara, HGNC:ST…	Is an ortholog of human ZFR (zinc finger RNA binding protein). Is predicted to have double-stranded RNA binding activity and single-stranded RNA binding activity. Human ortholog(s) of this gene are implicated in dystonia 16.
WBGene00021552	zip-4	Y44E3B.1	HGNC:CEBPE|ParaSite-Compara, HGNC:CEBPA|ParaSite-Compara, HGNC:CEBPD|ParaSite-Compara, HGNC:CEBPB|ParaSite-Compara	Is predicted to have DNA-binding transcription factor activity. Is expressed in gonad\; pharynx\; spermatheca\; and vulva. Human ortholog(s) of this gene are implicated in acute myeloid leukemia.
WBGene00004077	pop-1	W10C8.2	HGNC:LEF1|EnsEMBL-Compara;OrthoInspector;PhylomeDB;Hieranoid;Panther;Roundup;TreeFam;Inparanoid;OrthoFinder;ParaSite-Compara, HGNC:TCF7L2|EnsEMBL-Compara;OrthoInspector;PhylomeDB;Hieranoid;Panther;Roundup;TreeFam;Inparanoid;OrthoFinder, HGNC:TCF7|OrthoInspector;EnsEMBL-Compara;PhylomeDB;Hieranoid;Panther;TreeFam;Inparanoid;OrthoFinder;ParaSite-Compara, HGNC:TCF7L1|EnsEMBL-Compara;OrthoInspector;P…	Is an ortholog of human LEF1 (lymphoid enhancer binding factor 1). Exhibits several functions, including RNA polymerase II transcription factor binding activity\; beta-catenin binding activity\; and enzyme binding activity. Is involved in several processes, including mesodermal cell fate commitment\; mitochondrial unfolded protein response\; and regulation of transcription, DNA-templated. Localiz…
WBGene00003040	lin-59	T12F5.4	HGNC:ASH1L|OrthoInspector;Roundup;PhylomeDB;ParaSite-Compara, HGNC:KMT2B|ParaSite-Compara, HGNC:KMT2A|ParaSite-Compara, HGNC:SETDB2|ParaSite-Compara, HGNC:SUV39H2|ParaSite-Compara, HGNC:EHMT2|ParaSite-Compara, HGNC:EZH2|ParaSite-Compara, HGNC:SETD2|ParaSite-Compara, HGNC:NSD3|ParaSite-Compara, HGNC:NSD1|ParaSite-Compara, HGNC:SETBP1|ParaSite-Compara, ENSG00000285827|ParaSite-Compara, HGNC:SETD1B|…	Is an ortholog of human ASH1L (ASH1 like histone lysine methyltransferase). Is predicted to have histone methyltransferase activity (H3-K36 specific). Is involved in several processes, including ectodermal cell fate specification\; embryonic digestive tract development\; and nematode male tail tip morphogenesis. Is expressed in hypodermis and muscle cell. Is used to study leukemia. Human ortholog…
WBGene00000440	ceh-17	D1007.1	HGNC:PHOX2A|EnsEMBL-Compara;TreeFam;OrthoInspector;Roundup;Panther;OrthoFinder;ParaSite-Compara, HGNC:PHOX2B|TreeFam;EnsEMBL-Compara;Roundup;OrthoInspector;Panther;OrthoFinder	Is an ortholog of human PHOX2A (paired like homeobox 2A). Exhibits DNA-binding transcription activator activity, RNA polymerase II-specific. Is involved in axon guidance\; positive regulation of transcription by RNA polymerase II\; and regulation of axon extension. Localizes to nucleus. Is expressed in DA8\; head muscle\; head neurons\; and somatic nervous system. Human ortholog(s) of this gene a…
WBGene00002989	lim-7	C04F1.3	HGNC:ISL2|OrthoInspector;EnsEMBL-Compara;PhylomeDB;Panther;Roundup;TreeFam;Inparanoid;OrthoFinder;Hieranoid;ParaSite-Compara, HGNC:ISL1|EnsEMBL-Compara;OrthoInspector;PhylomeDB;Roundup;TreeFam;Inparanoid;OrthoFinder;Hieranoid;ParaSite-Compara	Is an ortholog of human ISL2 (ISL LIM homeobox 2). Is predicted to have DNA-binding transcription factor activity, RNA polymerase II-specific. Is involved in several processes, including gonad morphogenesis\; head morphogenesis\; and pharynx development. Localizes to nucleus. Is expressed in several structures, including body wall musculature\; gonadal sheath cell\; intestine\; rectum\; and somat…
WBGene00004393	rnt-1	B0414.2	HGNC:RUNX1|OrthoInspector;PhylomeDB;Hieranoid;Panther;Roundup;TreeFam;Inparanoid;OrthoFinder, HGNC:RUNX2|OrthoInspector;EnsEMBL-Compara;PhylomeDB;Hieranoid;Panther;Roundup;TreeFam;Inparanoid;OrthoFinder;ParaSite-Compara, HGNC:RUNX3|EnsEMBL-Compara;OrthoInspector;PhylomeDB;Hieranoid;Panther;TreeFam;OrthoFinder;Inparanoid;ParaSite-Compara	Is an ortholog of human RUNX2 (RUNX family transcription factor 2). Exhibits SMAD binding activity. Is involved in embryo development\; nematode male tail tip morphogenesis\; and regulation of growth. Localizes to nucleus. Is expressed in body wall musculature\; intestine\; neurons\; ray precursor cell\; and seam cell. Human ortholog(s) of this gene are implicated in cleidocranial dysplasia and m…
WBGene00000436	ceh-12	F33D11.4	HGNC:MNX1|OrthoInspector;Panther;Roundup;TreeFam;OrthoFinder;ParaSite-Compara	Is an ortholog of human MNX1 (motor neuron and pancreas homeobox 1). Is predicted to have DNA binding activity. Is expressed in VB neuron\; ventral nerve cord\; and vulval muscle. Human ortholog(s) of this gene are implicated in Currarino syndrome.
WBGene00000429	ceh-2	C27A12.5	HGNC:EMX2|EnsEMBL-Compara;OrthoInspector;Panther;Roundup;TreeFam;OrthoFinder;ParaSite-Compara, HGNC:EMX1|EnsEMBL-Compara;OrthoInspector;PhylomeDB;Panther;Roundup;TreeFam;OrthoFinder;ParaSite-Compara	Is an ortholog of human EMX1 (empty spiracles homeobox 1). Is predicted to have DNA-binding transcription repressor activity, RNA polymerase II-specific\; RNA polymerase II cis-regulatory region sequence-specific DNA binding activity\; and RNA polymerase II intronic transcription regulatory region sequence-specific DNA binding activity. Localizes to nucleus. Is expressed in neurons\; pharynx\; so…
WBGene00016750	let-611	C48E7.2	HGNC:POLR3C|EnsEMBL-Compara;OrthoInspector;PhylomeDB;Hieranoid;Panther;Roundup;Inparanoid;OrthoFinder;OMA;ParaSite-Compara	Is an ortholog of human POLR3C (RNA polymerase III subunit C). Is predicted to contribute to RNA polymerase III activity.
WBGene00003059	lpd-2	C48E7.3	HGNC:NGDN|OrthoInspector;EnsEMBL-Compara;PhylomeDB;Hieranoid;Panther;Roundup;TreeFam;Inparanoid;OrthoFinder;OMA;ParaSite-Compara	Is an ortholog of human NGDN (neuroguidin). Is expressed in nervous system. Is predicted to encode a protein with the following domains: Sas10\/Utp3\/C1D family and Sas10\/Utp3\/C1D.
WBGene00002601	let-381	F26B1.7	HGNC:FOXQ1|Hieranoid;TreeFam;Panther;OrthoFinder, HGNC:FOXF1|OrthoInspector;EnsEMBL-Compara;OrthoFinder;PhylomeDB;Hieranoid;ParaSite-Compara, HGNC:FOXF2|OrthoInspector;EnsEMBL-Compara;OrthoFinder;PhylomeDB;Hieranoid, HGNC:FOXK2|ParaSite-Compara, HGNC:FOXD4L6|ParaSite-Compara, HGNC:FOXR1|ParaSite-Compara, ENSG00000248767|ParaSite-Compara, HGNC:FOXD4L3|ParaSite-Compara, HGNC:FOXD4L5|ParaSite-Compar…	Is an ortholog of human FOXF1 (forkhead box F1). Exhibits sequence-specific DNA binding activity. Is involved in mesodermal cell fate specification\; nematode larval development\; and positive regulation of mesodermal cell fate specification. Localizes to nucleus. Is expressed in M.dlp\; M.drp\; body wall muscle cell from M lineage\; and coelomocyte. Human ortholog(s) of this gene are implicated …
WBGene00002783	let-607	F57B10.1	HGNC:CREB3L4|Panther;EnsEMBL-Compara;OrthoInspector;PhylomeDB;OrthoFinder;ParaSite-Compara, HGNC:CREB3|EnsEMBL-Compara;OrthoInspector;Panther;PhylomeDB;OrthoFinder;ParaSite-Compara, HGNC:CREB3L3|Panther;EnsEMBL-Compara;OrthoInspector;PhylomeDB;OrthoFinder;ParaSite-Compara, HGNC:ATF6|ParaSite-Compara, HGNC:CREB3L1|ParaSite-Compara, HGNC:ATF1|ParaSite-Compara, HGNC:ATF6B|ParaSite-Compara, HGNC:CREM…	Is an ortholog of human CREB3 (cAMP responsive element binding protein 3)\; CREB3L3 (cAMP responsive element binding protein 3 like 3)\; and CREB3L4 (cAMP responsive element binding protein 3 like 4). Is predicted to have DNA-binding transcription factor activity. Is involved in several processes, including protein folding\; regulation of establishment of cell polarity\; and regulation of signal …
WBGene00000483	che-1	C55B7.12	HGNC:ZSCAN4|Hieranoid;Inparanoid, HGNC:ZNF500|Roundup;PhylomeDB;OrthoInspector, HGNC:ZNF730|ParaSite-Compara, HGNC:ZNF257|ParaSite-Compara, HGNC:ZNF761|ParaSite-Compara, HGNC:ZNF626|ParaSite-Compara, HGNC:ZNF92|ParaSite-Compara, ENSG00000198039|ParaSite-Compara, HGNC:ZNF66|ParaSite-Compara, ENSG00000264668|ParaSite-Compara, HGNC:ZFP41|ParaSite-Compara, HGNC:ZNF100|ParaSite-Compara, ENSG0000023744…	Is an ortholog of human ZNF500. Exhibits RNA polymerase II regulatory region sequence-specific DNA binding activity. Is involved in several processes, including response to lithium ion\; response to magnesium ion\; and response to methionine. Is expressed in ASEL and ASER.
WBGene00020399	ztf-4	T10B11.3	HGNC:HNRNPC|TreeFam;OrthoFinder;PhylomeDB;OrthoInspector, HGNC:HNRNPCL1|TreeFam;OrthoFinder;PhylomeDB;OrthoInspector, HGNC:RALY|Roundup;TreeFam;OrthoFinder;OrthoInspector, HGNC:RSRC2|ParaSite-Compara, HGNC:RSRP1|ParaSite-Compara	Is an ortholog of human HNRNPC (heterogeneous nuclear ribonucleoprotein C)\; HNRNPCL1 (heterogeneous nuclear ribonucleoprotein C like 1)\; and RALY (RALY heterogeneous nuclear ribonucleoprotein). Is predicted to have RNA binding activity. Is expressed in body wall musculature\; egg-laying apparatus\; neurons\; and pharynx.
WBGene00001949	hlh-2	M05B5.5	HGNC:TCF4|EnsEMBL-Compara;OrthoInspector;Panther;Roundup;TreeFam;OrthoFinder;ParaSite-Compara, HGNC:TCF3|EnsEMBL-Compara;OrthoInspector;Panther;Roundup;TreeFam;OrthoFinder;ParaSite-Compara, HGNC:TCF12|EnsEMBL-Compara;OrthoInspector;Panther;Roundup;TreeFam;OrthoFinder;ParaSite-Compara	Is an ortholog of human TCF12 (transcription factor 12)\; TCF3 (transcription factor 3)\; and TCF4 (transcription factor 4). Exhibits several functions, including DNA-binding transcription factor activity, RNA polymerase II-specific\; bHLH transcription factor binding activity\; and protein dimerization activity. Is involved in several processes, including generation of neurons\; gonad morphogene…
WBGene00008762	ztf-2	F13G3.1	HGNC:ZSCAN5A|ParaSite-Compara, HGNC:ZSCAN29|ParaSite-Compara, HGNC:SCAND1|ParaSite-Compara, HGNC:ZSCAN18|ParaSite-Compara, HGNC:ZNF174|ParaSite-Compara, HGNC:ZNF274|ParaSite-Compara, HGNC:OVOL3|ParaSite-Compara, HGNC:ZNF444|ParaSite-Compara, HGNC:ZSCAN32|ParaSite-Compara, HGNC:ZNF496|ParaSite-Compara, HGNC:ZKSCAN2|ParaSite-Compara, HGNC:PLAGL2|ParaSite-Compara, HGNC:PLAGL1|ParaSite-Compara, HGNC:…	Is predicted to have DNA-binding transcription factor activity and transcription regulatory region DNA binding activity. Is expressed in pharyngeal neurons\; pharynx\; rectum\; and vulva. Human ortholog(s) of this gene are implicated in gingival fibromatosis 5 and pleomorphic adenoma.
WBGene00006790	unc-55	F55D12.4	HGNC:NR2F6|OMA;Inparanoid;Roundup;OrthoFinder, HGNC:NR2F1|OrthoInspector;EnsEMBL-Compara;Roundup;Inparanoid;OrthoFinder;OMA;Hieranoid, HGNC:NR2F2|OMA;Inparanoid;Roundup;OrthoFinder;Hieranoid	Is an ortholog of human NR2F1 (nuclear receptor subfamily 2 group F member 1). Is predicted to have several functions, including DNA-binding transcription factor activity\; nuclear receptor transcription coactivator activity\; and transcription factor binding activity. Is expressed in motor neurons\; somatic nervous system\; and spicule muscle.
WBGene00000433	ceh-8	ZK265.4	HGNC:RAX|OrthoInspector;Roundup;EnsEMBL-Compara;ParaSite-Compara, HGNC:DRGX|Panther;EnsEMBL-Compara, HGNC:RHOXF1|ParaSite-Compara, HGNC:PROP1|ParaSite-Compara, HGNC:ALX4|ParaSite-Compara, HGNC:GSC2|ParaSite-Compara, HGNC:PRRX2|ParaSite-Compara, HGNC:OTX1|ParaSite-Compara, HGNC:SEBOX|ParaSite-Compara, HGNC:PAX6|ParaSite-Compara, HGNC:HESX1|ParaSite-Compara, HGNC:PAX8|ParaSite-Compara, HGNC:OTX2|Pa…	Is an ortholog of human RAX (retina and anterior neural fold homeobox). Is predicted to have DNA-binding transcription factor activity, RNA polymerase II-specific and RNA polymerase II regulatory region sequence-specific DNA binding activity. Is expressed in Z1 and Z4. Human ortholog(s) of this gene are implicated in several diseases, including WAGR syndrome\; diabetes mellitus (multiple)\; and e…
WBGene00006844	unc-120	D1081.2	HGNC:SRF|EnsEMBL-Compara;OrthoInspector;PhylomeDB;Panther;Roundup;TreeFam;OrthoFinder;ParaSite-Compara	Is an ortholog of human SRF (serum response factor). Is predicted to have DNA binding activity and protein dimerization activity. Localizes to nucleus. Is expressed in non-striated muscle and pharyngeal cell.
WBGene00000431	ceh-6	K02B12.1	HGNC:POU3F3|EnsEMBL-Compara;OrthoInspector;PhylomeDB;Roundup;TreeFam;Hieranoid;Panther;ParaSite-Compara, HGNC:POU3F1|TreeFam;EnsEMBL-Compara;Roundup;Hieranoid;Panther;ParaSite-Compara, HGNC:POU3F4|EnsEMBL-Compara;PhylomeDB;Panther;Roundup;TreeFam;OrthoFinder;Hieranoid;ParaSite-Compara, HGNC:POU3F2|OrthoInspector;EnsEMBL-Compara;PhylomeDB;Roundup;TreeFam;Hieranoid;Panther;ParaSite-Compara, HGNC:PO…	Is an ortholog of human POU3F2 (POU class 3 homeobox 2)\; POU3F3 (POU class 3 homeobox 3)\; and POU3F4 (POU class 3 homeobox 4). Is predicted to have DNA-binding transcription activator activity, RNA polymerase II-specific. Is involved in excretion\; transdifferentiation\; and water homeostasis. Localizes to cytosol and nucleus. Is expressed in body wall musculature\; head neurons\; hyp7 syncytiu…
WBGene00000467	cep-1	F52B5.5	N.A.	Exhibits several functions, including DNA-binding transcription factor activity\; protein homodimerization activity\; and zinc ion binding activity. Is involved in several processes, including determination of adult lifespan\; intracellular signal transduction\; and response to hypoxia. Localizes to nucleolus and nucleoplasm. Is expressed in Z2\; Z3\; germ line\; pharyngeal cell\; and pharynx.
WBGene00001960	hlh-16	DY3.3	HGNC:OLIG1|EnsEMBL-Compara;PhylomeDB;Hieranoid;Panther;ParaSite-Compara, HGNC:NEUROD6|ParaSite-Compara, HGNC:ATOH1|ParaSite-Compara, HGNC:NEUROG2|ParaSite-Compara, HGNC:ATOH7|ParaSite-Compara, HGNC:BHLHE23|ParaSite-Compara, HGNC:NEUROG1|ParaSite-Compara, ENSG00000123307|ParaSite-Compara, HGNC:NEUROG3|ParaSite-Compara, HGNC:BHLHE22|ParaSite-Compara, HGNC:BHLHA15|ParaSite-Compara, HGNC:OLIG2|ParaSi…	Is an ortholog of human OLIG1 (oligodendrocyte transcription factor 1). Is predicted to have protein dimerization activity. Is expressed in ABplpapaaa\; ABplpapaap\; ABprpapaaa\; ABprpapaap\; and ventral ganglion. Human ortholog(s) of this gene are implicated in congenital malabsorptive diarrhea 4\; diabetes mellitus (multiple)\; and persistent hyperplastic primary vitreous.
WBGene00000468	ces-1	F43G9.11	HGNC:SCRT1|OrthoInspector;EnsEMBL-Compara;PhylomeDB;Roundup;TreeFam;OrthoFinder;ParaSite-Compara, HGNC:SCRT2|OrthoInspector;EnsEMBL-Compara;PhylomeDB;Roundup;TreeFam;OrthoFinder;ParaSite-Compara	Is an ortholog of human SCRT1 (scratch family transcriptional repressor 1) and SCRT2 (scratch family transcriptional repressor 2). Exhibits RNA polymerase II regulatory region sequence-specific DNA binding activity. Is involved in negative regulation of programmed cell death and negative regulation of transcription by RNA polymerase II.
WBGene00011034	paxt-1	R05D11.6	HGNC:NKRF|Roundup;Panther;OrthoFinder;ParaSite-Compara, HGNC:CDKN2AIPNL|OrthoInspector;EnsEMBL-Compara;OrthoFinder;ParaSite-Compara, HGNC:CDKN2AIP|ParaSite-Compara	Is an ortholog of human CDKN2AIPNL (CDKN2A interacting protein N-terminal like) and NKRF (NFKB repressing factor). Localizes to nucleolus and nucleoplasm.
WBGene00006577	tlf-1	F39H11.2	HGNC:TBPL1|EnsEMBL-Compara;TreeFam;Panther;PhylomeDB;OrthoFinder;ParaSite-Compara	Is an ortholog of human TBPL1 (TATA-box binding protein like 1). Is predicted to have DNA binding activity\; DNA-binding transcription factor activity\; and transcription factor binding activity. Is involved in embryo development\; positive regulation of protein phosphorylation\; and regulation of transcription by RNA polymerase II. Localizes to nucleus. Is expressed in several structures, includ…
WBGene00001568	snpc-4	F32H2.1	HGNC:SNAPC4|EnsEMBL-Compara;OrthoInspector;PhylomeDB;Panther;Roundup;TreeFam;ParaSite-Compara	Is an ortholog of human SNAPC4 (small nuclear RNA activating complex polypeptide 4). Is predicted to have DNA binding activity. Is involved in protein folding. Is expressed in germ cell\; head neurons\; intestine\; and somatic gonad.
WBGene00003182	mef-2	W10D5.1	HGNC:MEF2C|EnsEMBL-Compara;OrthoInspector;PhylomeDB;Panther;Roundup;Inparanoid;OrthoFinder, HGNC:MEF2B|Panther;EnsEMBL-Compara;OrthoFinder;ParaSite-Compara, HGNC:MEF2D|EnsEMBL-Compara;OrthoInspector;PhylomeDB;Panther;Roundup;Inparanoid;OrthoFinder;ParaSite-Compara, HGNC:BORCS8-MEF2B|Roundup;TreeFam;Panther;OrthoFinder, HGNC:MEF2A|EnsEMBL-Compara;OrthoInspector;PhylomeDB;Panther;Roundup;OrthoFinde…	Is an ortholog of human MEF2D (myocyte enhancer factor 2D). Exhibits sequence-specific DNA binding activity. Is involved in negative regulation of transcription by RNA polymerase II\; positive regulation of transcription by RNA polymerase II\; and regulation of acetylcholine secretion, neurotransmission. Localizes to nucleus. Is expressed in several structures, including hypodermis. Is used to st…
WBGene00001574	gei-17	W10D5.3	HGNC:PIAS2|EnsEMBL-Compara;OrthoInspector;PhylomeDB;Panther;Roundup;Hieranoid;OrthoFinder;ParaSite-Compara, HGNC:PIAS3|EnsEMBL-Compara;OrthoInspector;PhylomeDB;Panther;Roundup;Hieranoid;OrthoFinder;ParaSite-Compara, HGNC:PIAS4|EnsEMBL-Compara;OrthoInspector;PhylomeDB;Panther;Roundup;Hieranoid;OrthoFinder;ParaSite-Compara, HGNC:PIAS1|EnsEMBL-Compara;OrthoInspector;PhylomeDB;Panther;Roundup;Hierano…	Is an ortholog of several human genes including PIAS1 (protein inhibitor of activated STAT 1)\; PIAS2 (protein inhibitor of activated STAT 2)\; and PIAS3 (protein inhibitor of activated STAT 3). Exhibits RNA polymerase II transcription factor binding activity and SUMO ligase activity. Is involved in several processes, including meiotic metaphase I plate congression\; protein autosumoylation\; and…
WBGene00007645	C17E4.6	C17E4.6	HGNC:VPS72|OrthoInspector;EnsEMBL-Compara;PhylomeDB;Hieranoid;Panther;Roundup;TreeFam;Inparanoid;OrthoFinder;ParaSite-Compara	Is an ortholog of human VPS72 (vacuolar protein sorting 72 homolog). Is predicted to encode a protein with the following domains: YL1 nuclear protein C-terminal domain\; YL1 nuclear protein\; Vps72\/YL1 family\; and Vps72\/YL1, C-terminal.
WBGene00007984	irx-1	C36F7.1	HGNC:IRX1|EnsEMBL-Compara;Panther;Roundup;Inparanoid;OrthoFinder;OrthoInspector;ParaSite-Compara, HGNC:IRX2|Panther;EnsEMBL-Compara;Inparanoid;OrthoFinder;OrthoInspector;Hieranoid, HGNC:IRX4|Roundup;Inparanoid;Panther;OrthoFinder;OrthoInspector, HGNC:IRX6|Roundup;Panther;Inparanoid;OrthoFinder;OrthoInspector;EnsEMBL-Compara, HGNC:IRX3|EnsEMBL-Compara;Panther;Roundup;Inparanoid;OrthoFinder;OrthoIn…	Is an ortholog of human IRX5 (iroquois homeobox 5). Is predicted to have DNA binding activity. Localizes to nucleus. Is expressed in several structures, including DD neuron\; head muscle\; head neurons\; intestine\; and somatic nervous system.
WBGene00009939	ztf-11	F52F12.6	HGNC:ST18|EnsEMBL-Compara;OrthoInspector;Panther;Roundup;TreeFam;OrthoFinder, HGNC:MYT1L|EnsEMBL-Compara;OrthoInspector;Panther;Roundup;TreeFam;OrthoFinder;ParaSite-Compara, HGNC:MYT1|EnsEMBL-Compara;OrthoInspector;Panther;Roundup;TreeFam;OrthoFinder, HGNC:IRF2BP1|ParaSite-Compara	Is an ortholog of human MYT1L (myelin transcription factor 1 like). Is predicted to have RNA polymerase II cis-regulatory region sequence-specific DNA binding activity. Is involved in several processes, including generation of neurons\; nematode larval development\; and positive regulation of transdifferentiation. Localizes to nucleus. Is expressed in g1 and head neurons. Human ortholog(s) of thi…
WBGene00000430	ceh-5	C16C2.1	HGNC:VAX2|Panther;Roundup;EnsEMBL-Compara;OrthoFinder, HGNC:VAX1|Panther;OrthoInspector;EnsEMBL-Compara;OrthoFinder, HGNC:NOTO|Panther;EnsEMBL-Compara;ParaSite-Compara, HGNC:GSX1|ParaSite-Compara	Is an ortholog of human VAX1 (ventral anterior homeobox 1) and VAX2 (ventral anterior homeobox 2). Is predicted to have DNA-binding transcription repressor activity, RNA polymerase II-specific\; RNA polymerase II cis-regulatory region sequence-specific DNA binding activity\; and RNA polymerase II intronic transcription regulatory region sequence-specific DNA binding activity. Is expressed in dors…
WBGene00001442	fkh-10	C25A1.2	HGNC:FOXJ1|Roundup;OrthoFinder;EnsEMBL-Compara;ParaSite-Compara, HGNC:FOXK2|EnsEMBL-Compara;Roundup, HGNC:FOXJ2|ParaSite-Compara, HGNC:FOXI3|ParaSite-Compara, HGNC:FOXD4L3|ParaSite-Compara, HGNC:FOXR1|ParaSite-Compara, HGNC:FOXD4|ParaSite-Compara, HGNC:FOXD4L5|ParaSite-Compara, HGNC:FOXD4L1|ParaSite-Compara, HGNC:FOXE3|ParaSite-Compara, HGNC:FOXD4L4|ParaSite-Compara, HGNC:FOXD4L6|ParaSite-Compara…	Is an ortholog of human FOXJ1 (forkhead box J1). Is predicted to have DNA-binding transcription factor activity, RNA polymerase II-specific. Is expressed in gonad and pharyngeal neurons. Human ortholog(s) of this gene are implicated in cataract 34 multiple types\; congenital aphakia\; and persistent fetal circulation syndrome.
WBGene00003000	lin-11	ZC247.3	HGNC:LHX1|OrthoInspector;Hieranoid;Panther;Roundup;TreeFam;Inparanoid;OrthoFinder;OMA, HGNC:LHX5|OrthoInspector;Hieranoid;Panther;Roundup;TreeFam;Inparanoid;OrthoFinder;OMA	Is an ortholog of human LHX1 (LIM homeobox 1) and LHX5 (LIM homeobox 5). Is predicted to have DNA-binding transcription factor activity, RNA polymerase II-specific and RNA polymerase II regulatory region sequence-specific DNA binding activity. Is involved in several processes, including axonal fasciculation\; oviposition\; and positive regulation of vulval development. Is expressed in several str…
WBGene00000095	aha-1	C25A1.11	HGNC:ARNT2|OrthoInspector;PhylomeDB;Hieranoid;Panther;Roundup;TreeFam;OrthoFinder;Inparanoid;EnsEMBL-Compara;ParaSite-Compara, HGNC:ARNT|EnsEMBL-Compara;OrthoInspector;PhylomeDB;Hieranoid;Panther;Roundup;TreeFam;Inparanoid;OrthoFinder;ParaSite-Compara, HGNC:NPAS2|ParaSite-Compara, HGNC:CLOCK|ParaSite-Compara	Is an ortholog of human ARNT (aryl hydrocarbon receptor nuclear translocator) and ARNT2 (aryl hydrocarbon receptor nuclear translocator 2). Exhibits DNA binding activity\; DNA-binding transcription factor activity\; and RNA polymerase II transcription factor binding activity. Contributes to sequence-specific DNA binding activity. Is involved in several processes, including positive regulation of …
WBGene00003233	mgl-2	F45H11.4	HGNC:GRM5|OrthoInspector;EnsEMBL-Compara;PhylomeDB;Hieranoid;Panther;TreeFam;Inparanoid;OrthoFinder;OMA;ParaSite-Compara, HGNC:GRM1|OrthoInspector;EnsEMBL-Compara;PhylomeDB;Hieranoid;Panther;TreeFam;Inparanoid;OrthoFinder;OMA;ParaSite-Compara	Is an ortholog of human GRM1 (glutamate metabotropic receptor 1) and GRM5 (glutamate metabotropic receptor 5). Is predicted to have G protein-coupled receptor activity involved in regulation of postsynaptic membrane potential\; glutamate receptor activity\; and neurotransmitter receptor activity involved in regulation of postsynaptic cytosolic calcium ion concentration. Is expressed in several st…
WBGene00003847	blmp-1	F25D7.3	HGNC:PRDM1|EnsEMBL-Compara;OrthoInspector;PhylomeDB;Hieranoid;Panther;Roundup;TreeFam;OrthoFinder;Inparanoid;ParaSite-Compara	Is an ortholog of human PRDM1 (PR\/SET domain 1). Exhibits cis-regulatory region sequence-specific DNA binding activity. Is involved in several processes, including dauer entry\; negative regulation of distal tip cell migration\; and regulation of transcription by RNA polymerase II. Localizes to cytoplasm and nucleus. Is expressed in several structures, including distal tip cell\; dorsal nerve co…
WBGene00000912	daf-16	R13H8.1	HGNC:FOXO4|OrthoInspector;EnsEMBL-Compara;Panther;Roundup;TreeFam;OrthoFinder, HGNC:FOXO3|EnsEMBL-Compara;OrthoInspector;Panther;Roundup;TreeFam;OrthoFinder, HGNC:FOXO6|EnsEMBL-Compara;OrthoInspector;Panther;TreeFam;OrthoFinder, HGNC:FOXO1|EnsEMBL-Compara;OrthoInspector;Panther;Roundup;TreeFam;OrthoFinder, HGNC:FOXJ2|ParaSite-Compara, HGNC:FOXI3|ParaSite-Compara, HGNC:FOXD4L3|ParaSite-Compara, HG…	Is an ortholog of human FOXO1 (forkhead box O1)\; FOXO3 (forkhead box O3)\; and FOXO4 (forkhead box O4). Exhibits several functions, including 14-3-3 protein binding activity\; DNA-binding transcription factor activity\; and enzyme binding activity. Is involved in several processes, including defense response to other organism\; regulation of dauer larval development\; and regulation of transcrip…
WBGene00012317	ztf-6	W06H12.1	ENSG00000267477|ParaSite-Compara, HGNC:ZFP91-CNTF|ParaSite-Compara, HGNC:ZBTB32|ParaSite-Compara, HGNC:VEZF1|ParaSite-Compara, HGNC:ZNF384|ParaSite-Compara, HGNC:ZNF276|ParaSite-Compara, HGNC:ZBTB18|ParaSite-Compara, HGNC:ZNF692|ParaSite-Compara, HGNC:ZBTB1|ParaSite-Compara, HGNC:HIC2|ParaSite-Compara, HGNC:PRDM6|ParaSite-Compara, HGNC:PRDM10|ParaSite-Compara, HGNC:HIC1|ParaSite-Compara, HGNC:ZNF…	Is predicted to have nucleic acid binding activity. Is expressed in several structures, including head muscle\; hyp7\; hypodermis\; postdeirid sensillum\; and tail. Human ortholog(s) of this gene are implicated in autosomal dominant non-syndromic intellectual disability 22.
WBGene00013178	Y53H1A.2	Y53H1A.2	N.A.	Is predicted to have nucleic acid binding activity.
WBGene00008670	eif-2Bdelta	F11A3.2	HGNC:EIF2B4|OrthoInspector;EnsEMBL-Compara;PhylomeDB;Hieranoid;Panther;Roundup;Inparanoid;OMA;OrthoFinder;ParaSite-Compara	Is an ortholog of human EIF2B4 (eukaryotic translation initiation factor 2B subunit delta). Is predicted to have translation initiation factor activity. Is involved in several processes, including determination of adult lifespan\; lipid storage\; and translation. Human ortholog(s) of this gene are implicated in leukoencephalopathy with vanishing white matter.
WBGene00002004	hsf-1	Y53C10A.12	HGNC:HSF1|EnsEMBL-Compara;OrthoInspector;PhylomeDB;Panther;Roundup;Inparanoid;OrthoFinder, HGNC:HSF4|EnsEMBL-Compara;OrthoInspector;PhylomeDB;Panther;Roundup;OrthoFinder, HGNC:HSF2|OrthoInspector;PhylomeDB;Panther;Roundup;Inparanoid;OrthoFinder;EnsEMBL-Compara, HGNC:HSFX1|Panther;EnsEMBL-Compara;PhylomeDB;ParaSite-Compara, HGNC:HSFX3|ParaSite-Compara, HGNC:HSF5|ParaSite-Compara, HGNC:HSFX4|ParaSi…	Is an ortholog of human HSF1 (heat shock transcription factor 1) and HSF2 (heat shock transcription factor 2). Exhibits calmodulin binding activity\; promoter-specific chromatin binding activity\; and sequence-specific double-stranded DNA binding activity. Is involved in several processes, including dauer larval development\; defense response to other organism\; and determination of adult lifespa…
WBGene00003905	pad-1	Y18D10A.13	HGNC:DOP1A|OrthoInspector;EnsEMBL-Compara;PhylomeDB;Hieranoid;Panther;Roundup;TreeFam;Inparanoid;OrthoFinder;OMA;ParaSite-Compara, HGNC:DOP1B|EnsEMBL-Compara;OrthoInspector;PhylomeDB;Hieranoid;Panther;Roundup;TreeFam;Inparanoid;OrthoFinder;OMA	Is an ortholog of human DOP1A (DOP1 leucine zipper like protein A). Is expressed in head and tail. Is used to study Down syndrome. Is predicted to encode a protein with the following domains: Dopey, N-terminal\; Dopey, N-terminal\; Armadillo-type fold\; and Protein dopey.
WBGene00012241	W04A8.6	W04A8.6	N.A.	Is enriched in NSM based on RNA-seq studies. Is affected by several genes including daf-2\; elt-2\; and sir-2.1 based on microarray and RNA-seq studies. Is affected by six chemicals including Alovudine\; stavudine\; and Zidovudine based on RNA-seq and microarray studies.
WBGene00000469	ces-2	ZK909.4	HGNC:TEF|EnsEMBL-Compara;OrthoInspector;PhylomeDB;Panther;TreeFam;ParaSite-Compara, HGNC:DBP|EnsEMBL-Compara;OrthoInspector;Panther;Roundup;TreeFam;ParaSite-Compara, HGNC:HLF|Panther;TreeFam;EnsEMBL-Compara;OrthoInspector;ParaSite-Compara	Is an ortholog of human DBP (D-box binding PAR bZIP transcription factor) and TEF (TEF transcription factor, PAR bZIP family member). Exhibits RNA polymerase II regulatory region DNA binding activity and sequence-specific double-stranded DNA binding activity. Is involved in apoptotic process and positive regulation of programmed cell death. Is expressed in excretory duct cell. Is used to study ac…
WBGene00001707	grh-1	Y48G8AR.1	HGNC:GRHL1|EnsEMBL-Compara;OrthoInspector;PhylomeDB;Hieranoid;Panther;Roundup;TreeFam;Inparanoid;OrthoFinder;ParaSite-Compara, HGNC:GRHL3|EnsEMBL-Compara;OrthoInspector;PhylomeDB;Hieranoid;Panther;TreeFam;Inparanoid;OrthoFinder;ParaSite-Compara, HGNC:GRHL2|EnsEMBL-Compara;OrthoInspector;PhylomeDB;Hieranoid;Panther;TreeFam;Inparanoid;OrthoFinder;ParaSite-Compara, HGNC:TFCP2L1|ParaSite-Compara, HGN…	Is an ortholog of human GRHL1 (grainyhead like transcription factor 1). Is predicted to have DNA-binding transcription factor activity and sequence-specific DNA binding activity. Human ortholog(s) of this gene are implicated in Van der Woude syndrome and autosomal dominant nonsyndromic deafness 28.
WBGene00022025	cus-2	Y65B4A.1	HGNC:HTATSF1|EnsEMBL-Compara;OrthoInspector;PhylomeDB;Hieranoid;Panther;Roundup;TreeFam;OrthoFinder;ParaSite-Compara	Is an ortholog of human HTATSF1 (HIV-1 Tat specific factor 1). Is predicted to have RNA binding activity.
WBGene00022042	icd-2	Y65B4BR.5	HGNC:NACAD|EnsEMBL-Compara;OrthoInspector;Panther;OrthoFinder, HGNC:NACA|EnsEMBL-Compara;OrthoInspector;PhylomeDB;Hieranoid;Panther;Roundup;Inparanoid;OrthoFinder;ParaSite-Compara, HGNC:NACA2|EnsEMBL-Compara;OrthoInspector;Panther;Inparanoid;OrthoFinder;OMA;Hieranoid	Is an ortholog of human NACA (nascent polypeptide associated complex subunit alpha). Is expressed in intestinal cell. Is predicted to encode a protein with the following domains: Phosphorylation site\; NAC domain\; Nascent polypeptide-associated complex NAC domain\; Nascent polypeptide-associated complex subunit alpha\; and NAC A\/B domain superfamily.
WBGene00017742	nfyc-1	F23F1.1	HGNC:NFYC|EnsEMBL-Compara;OrthoInspector;PhylomeDB;Panther;Roundup;TreeFam;OrthoFinder;ParaSite-Compara	Is an ortholog of human NFYC (nuclear transcription factor Y subunit gamma). Is predicted to have RNA polymerase II cis-regulatory region sequence-specific DNA binding activity. Is expressed in several structures, including excretory cell\; gonad\; head neurons\; and oocyte.
WBGene00022554	duxl-1	ZC204.2	HGNC:DUXA|TreeFam;PhylomeDB	Is predicted to have DNA-binding transcription repressor activity, RNA polymerase II-specific\; RNA polymerase II cis-regulatory region sequence-specific DNA binding activity\; and RNA polymerase II intronic transcription regulatory region sequence-specific DNA binding activity. Is expressed in coelomocyte\; excretory cell\; gonad\; and spermatheca.
WBGene00006387	taf-6.1	W09B6.2	HGNC:TAF6|OrthoInspector;PhylomeDB;Hieranoid;Panther;Roundup;TreeFam;Inparanoid;OrthoFinder;EnsEMBL-Compara;ParaSite-Compara	Is an ortholog of human TAF6 (TATA-box binding protein associated factor 6). Is predicted to have protein heterodimerization activity.
WBGene00018446	ceh-83	F45C12.15	HGNC:HINFP|ParaSite-Compara	Is predicted to have DNA binding activity. Is expressed in hypodermis\; intestine\; and vulva.
WBGene00018434	ceh-81	F45C12.3	N.A.	Is predicted to have DNA binding activity. Is expressed in dorsal nerve cord\; head muscle\; tail neurons\; and ventral nerve cord.
WBGene00018355	ceh-86	F42G2.6	N.A.	Is predicted to have DNA binding activity.
WBGene00004750	sea-1	F19B10.9	HGNC:MGA|EnsEMBL-Compara;OrthoFinder;ParaSite-Compara, HGNC:TBX6|ParaSite-Compara, HGNC:TBX19|ParaSite-Compara, HGNC:TBX22|ParaSite-Compara, HGNC:EOMES|ParaSite-Compara, HGNC:TBXT|ParaSite-Compara, HGNC:TBX15|ParaSite-Compara, HGNC:TBX2|ParaSite-Compara, HGNC:TBX20|ParaSite-Compara, HGNC:TBX3|ParaSite-Compara, HGNC:TBX4|ParaSite-Compara, HGNC:TBR1|ParaSite-Compara	Is an ortholog of human MGA (MAX dimerization protein MGA). Exhibits RNA polymerase II regulatory region sequence-specific DNA binding activity. Is involved in dosage compensation by hypoactivation of X chromosome\; positive regulation of transcription by RNA polymerase II\; and sex determination. Localizes to nucleus. Is expressed in several structures, including coelomocyte\; head muscle\; inte…
WBGene00003017	lin-31	K10G6.1	HGNC:FOXB1|OrthoInspector;EnsEMBL-Compara;PhylomeDB;Hieranoid;Panther;Roundup;Inparanoid;OrthoFinder, HGNC:FOXB2|EnsEMBL-Compara;OrthoInspector;PhylomeDB;Hieranoid;Panther;Roundup;TreeFam;Inparanoid;OrthoFinder;ParaSite-Compara	Is an ortholog of human FOXB2 (forkhead box B2). Exhibits sequence-specific DNA binding activity. Is involved in vulval development. Localizes to nucleus. Is expressed in several structures, including P11.p\; P9.p\; gonad\; nerve ring\; and vulval precursor cell.
WBGene00001438	fkh-6	B0286.5	HGNC:FOXE3|EnsEMBL-Compara;Panther;OrthoFinder;ParaSite-Compara, HGNC:FOXE1|Panther;EnsEMBL-Compara;OrthoFinder, HGNC:FOXL2|TreeFam;OrthoFinder, HGNC:FOXI2|EnsEMBL-Compara;Inparanoid;ParaSite-Compara, HGNC:FOXI3|EnsEMBL-Compara;Inparanoid;ParaSite-Compara, HGNC:FOXJ2|ParaSite-Compara, HGNC:FOXD4L3|ParaSite-Compara, HGNC:FOXA1|ParaSite-Compara, HGNC:FOXR1|ParaSite-Compara, HGNC:FOXD4|ParaSite-Comp…	Is an ortholog of human FOXE3 (forkhead box E3). Exhibits sequence-specific DNA binding activity. Is involved in male germ-line sex determination and male gonad development. Is expressed in gonadal sheath cell\; male gonad\; somatic gonad precursor\; spermatheca\; and in male. Human ortholog(s) of this gene are implicated in cataract 34 multiple types\; congenital aphakia\; and persistent fetal c…
WBGene00001948	hlh-1	B0304.1	HGNC:MYOG|OrthoInspector;EnsEMBL-Compara;PhylomeDB;Panther;Roundup;TreeFam;OrthoFinder;ParaSite-Compara, HGNC:MYOD1|EnsEMBL-Compara;OrthoInspector;PhylomeDB;Panther;Roundup;TreeFam;OrthoFinder;ParaSite-Compara, HGNC:MYF5|EnsEMBL-Compara;OrthoInspector;PhylomeDB;Panther;Roundup;TreeFam;OrthoFinder;ParaSite-Compara, HGNC:MYF6|OrthoInspector;EnsEMBL-Compara;PhylomeDB;Panther;Roundup;TreeFam;OrthoFin…	Is an ortholog of several human genes including MYF5 (myogenic factor 5)\; MYF6 (myogenic factor 6)\; and MYOD1 (myogenic differentiation 1). Exhibits DNA-binding transcription factor activity, RNA polymerase II-specific\; RNA polymerase II regulatory region sequence-specific DNA binding activity\; and protein homodimerization activity. Is involved in several processes, including positive regulat…
WBGene00006554	tbx-35	ZK177.10	HGNC:EOMES|TreeFam;Panther;PhylomeDB, HGNC:TBR1|TreeFam;Panther;PhylomeDB	Is an ortholog of human EOMES (eomesodermin) and TBR1 (T-box brain transcription factor 1). Exhibits sequence-specific DNA binding activity. Is involved in cell fate specification\; pharyngeal muscle development\; and positive regulation of transcription by RNA polymerase II. Is expressed in several structures, including MSaa\; MSpa\; MSpp\; head neurons\; and intestine.
WBGene00016162	crh-2	C27D6.4	HGNC:CREB3L2|Panther;EnsEMBL-Compara;Roundup;Hieranoid;ParaSite-Compara, HGNC:CREB3L1|EnsEMBL-Compara;OrthoInspector;Panther;Roundup;Hieranoid;ParaSite-Compara, HGNC:ATF6|ParaSite-Compara, HGNC:CREB3L4|ParaSite-Compara, HGNC:ATF6B|ParaSite-Compara, HGNC:CREB3|ParaSite-Compara, HGNC:CREB3L3|ParaSite-Compara	Is an ortholog of human CREB3L1 (cAMP responsive element binding protein 3 like 1). Is predicted to have cAMP response element binding activity. Is expressed in body wall musculature\; seam cell\; spermatheca\; and tail. Human ortholog(s) of this gene are implicated in achromatopsia 7 and osteogenesis imperfecta type 16.
WBGene00017326	dmd-5	F10C1.5	HGNC:DMRTA1|TreeFam;Panther;Roundup;OrthoFinder, HGNC:DMRTA2|OrthoInspector;Panther;Roundup;TreeFam;OrthoFinder, HGNC:DMRT3|ParaSite-Compara, HGNC:DMRTB1|ParaSite-Compara, HGNC:DMRTC2|ParaSite-Compara, HGNC:DMRT1|ParaSite-Compara, HGNC:DMRTC1|ParaSite-Compara, HGNC:DMRTC1B|ParaSite-Compara	Is an ortholog of human DMRTA2 (DMRT like family A2). Is predicted to have DNA-binding transcription factor activity\; metal ion binding activity\; and sequence-specific DNA binding activity. Is expressed in AVG\; ventral nerve cord\; and in male.
WBGene00001440	fkh-8	F40H3.4	HGNC:FOXR1|EnsEMBL-Compara;PhylomeDB;ParaSite-Compara, HGNC:FOXE3|ParaSite-Compara, HGNC:FOXS1|ParaSite-Compara, HGNC:FOXD4L4|ParaSite-Compara, HGNC:FOXD4L6|ParaSite-Compara, HGNC:FOXI3|ParaSite-Compara, HGNC:FOXF1|ParaSite-Compara, ENSG00000248767|ParaSite-Compara, HGNC:FOXD4L3|ParaSite-Compara, HGNC:FOXD4|ParaSite-Compara, HGNC:FOXJ1|ParaSite-Compara, HGNC:FOXD4L1|ParaSite-Compara, HGNC:FOXD4L5…	Is an ortholog of human FOXR1 (forkhead box R1). Is predicted to have DNA-binding transcription factor activity, RNA polymerase II-specific. Is expressed in ASEL\; ASER\; head neurons\; neurons\; and tail neurons. Human ortholog(s) of this gene are implicated in cataract 34 multiple types\; congenital aphakia\; and persistent fetal circulation syndrome.
WBGene00001208	egl-44	F28B12.2	HGNC:TEAD3|OrthoInspector;EnsEMBL-Compara;PhylomeDB;Hieranoid;Panther;Roundup;TreeFam;Inparanoid;OrthoFinder;OMA;ParaSite-Compara, HGNC:TEAD1|OrthoInspector;EnsEMBL-Compara;PhylomeDB;Hieranoid;Panther;Roundup;TreeFam;OrthoFinder;Inparanoid;OMA;ParaSite-Compara, HGNC:TEAD4|EnsEMBL-Compara;OrthoInspector;PhylomeDB;Hieranoid;Panther;Roundup;TreeFam;Inparanoid;OrthoFinder;OMA;ParaSite-Compara, HGNC:T…	Is an ortholog of several human genes including TEAD3 (TEA domain transcription factor 3)\; TEAD4 (TEA domain transcription factor 4)\; and Tead2. Exhibits RNA polymerase II transcription coactivator binding activity and RNA polymerase II transcription factor binding activity. Is involved in generation of neurons\; positive regulation of exit from mitosis\; and positive regulation of transcriptio…
WBGene00019424	aptf-1	K06A1.1	HGNC:TFAP2A|EnsEMBL-Compara;OrthoInspector;PhylomeDB;Panther;Roundup;OrthoFinder;ParaSite-Compara, HGNC:TFAP2E|OrthoInspector;EnsEMBL-Compara;PhylomeDB;Panther;Roundup;OrthoFinder;ParaSite-Compara, HGNC:TFAP2B|EnsEMBL-Compara;OrthoInspector;Panther;PhylomeDB;OrthoFinder;ParaSite-Compara, HGNC:TFAP2C|OrthoInspector;EnsEMBL-Compara;PhylomeDB;Panther;Roundup;OrthoFinder;ParaSite-Compara, HGNC:TFAP2D…	Is an ortholog of several human genes including TFAP2A (transcription factor AP-2 alpha)\; TFAP2C (transcription factor AP-2 gamma)\; and Tfap2d. Is predicted to have DNA-binding transcription factor activity, RNA polymerase II-specific and RNA polymerase II regulatory region sequence-specific DNA binding activity. Is involved in positive regulation of transcription by RNA polymerase II and sleep…
WBGene00006380	tab-1	F31E8.3	HGNC:BSX|OrthoInspector;EnsEMBL-Compara;Panther;Roundup;TreeFam;OrthoFinder;ParaSite-Compara, HGNC:NANOG|ParaSite-Compara, HGNC:DLX4|ParaSite-Compara, HGNC:DLX1|ParaSite-Compara, HGNC:DLX2|ParaSite-Compara, HGNC:NANOGP8|ParaSite-Compara, HGNC:DLX3|ParaSite-Compara, HGNC:DLX5|ParaSite-Compara	Is an ortholog of human BSX (brain specific homeobox). Is predicted to have DNA-binding transcription factor activity and RNA polymerase II cis-regulatory region sequence-specific DNA binding activity. Is expressed in head neurons and intestine. Human ortholog(s) of this gene are implicated in several diseases, including amelogenesis imperfecta type 4\; orofacial cleft 15\; and split hand-foot ma…
WBGene00022855	tcer-1	ZK1127.9	HGNC:TCERG1L|Panther;EnsEMBL-Compara;OrthoInspector;Roundup;Hieranoid;OrthoFinder;ParaSite-Compara, HGNC:TCERG1|EnsEMBL-Compara;OrthoInspector;PhylomeDB;Hieranoid;Panther;Roundup;TreeFam;Inparanoid;OrthoFinder;OMA	Is an ortholog of human TCERG1 (transcription elongation regulator 1). Is predicted to have RNA polymerase binding activity and transcription coregulator activity. Localizes to nuclear periphery. Is expressed in several structures, including germ cell\; gonad\; hypodermal cell\; intestinal cell\; and somatic cell.
WBGene00000271	brf-1	F45E12.2	HGNC:BRF1|EnsEMBL-Compara;OrthoInspector;PhylomeDB;Hieranoid;Panther;Roundup;OrthoFinder;Inparanoid;OMA;ParaSite-Compara	Is an ortholog of human BRF1 (BRF1 RNA polymerase III transcription initiation factor subunit). Is predicted to have RNA polymerase III type 3 promoter sequence-specific DNA binding activity and transcription factor binding activity.
WBGene00017664	npax-1	F21D12.5	N.A.	Is predicted to have DNA binding activity. Is expressed in head neurons.
WBGene00003012	lin-26	F18A1.2	N.A.	Exhibits RNA polymerase II regulatory region sequence-specific DNA binding activity. Is involved in several processes, including ectoderm development\; establishment or maintenance of epithelial cell apical\/basal polarity\; and vulval development. Localizes to nucleus. Is expressed in several structures, including Z2\; epithelial cell\; germ line\; gonad\; and somatic gonad precursor.
WBGene00007014	mdt-10	T09A5.6	HGNC:MED10|OrthoInspector;EnsEMBL-Compara;PhylomeDB;Hieranoid;Panther;Roundup;OrthoFinder;Inparanoid;OMA	Is an ortholog of human MED10 (mediator complex subunit 10). Is predicted to have transcription coregulator activity.
WBGene00009899	efl-3	F49E12.6	HGNC:E2F8|EnsEMBL-Compara;Panther;OrthoFinder;PhylomeDB;OrthoInspector;ParaSite-Compara, HGNC:E2F7|EnsEMBL-Compara;OrthoInspector;PhylomeDB;Panther;Roundup;OrthoFinder;ParaSite-Compara, HGNC:E2F5|ParaSite-Compara, HGNC:E2F1|ParaSite-Compara, HGNC:E2F6|ParaSite-Compara, HGNC:E2F4|ParaSite-Compara	Is an ortholog of human E2F7 (E2F transcription factor 7). Is predicted to have DNA-binding transcription factor activity, RNA polymerase II-specific\; sequence-specific DNA binding activity\; and transcription factor binding activity. Is expressed in VA neuron\; VB neuron\; head neurons\; and ventral nerve cord.
WBGene00009202	aptf-4	F28C6.1	HGNC:TFAP2D|TreeFam;Panther;PhylomeDB;EnsEMBL-Compara;ParaSite-Compara, HGNC:TFAP2A|ParaSite-Compara, HGNC:TFAP2C|ParaSite-Compara, HGNC:TFAP2B|ParaSite-Compara, HGNC:TFAP2E|ParaSite-Compara	Is an ortholog of human Tfap2d. Is predicted to have DNA-binding transcription factor activity, RNA polymerase II-specific\; RNA polymerase II regulatory region sequence-specific DNA binding activity\; and transcription coactivator activity. Is expressed in head neurons and ventral nerve cord. Human ortholog(s) of this gene are implicated in Char syndrome and branchiooculofacial syndrome.
WBGene00009203	aptf-3	F28C6.2	HGNC:TFAP2B|EnsEMBL-Compara;Panther;PhylomeDB;ParaSite-Compara, HGNC:TFAP2A|Panther;EnsEMBL-Compara;PhylomeDB;ParaSite-Compara, HGNC:TFAP2D|EnsEMBL-Compara;TreeFam;Panther;ParaSite-Compara, HGNC:TFAP2E|Panther;EnsEMBL-Compara;PhylomeDB;ParaSite-Compara, HGNC:TFAP2C|EnsEMBL-Compara;Panther;PhylomeDB;ParaSite-Compara	Is an ortholog of several human genes including TFAP2A (transcription factor AP-2 alpha)\; TFAP2C (transcription factor AP-2 gamma)\; and Tfap2d. Is predicted to have DNA-binding transcription factor activity, RNA polymerase II-specific\; RNA polymerase II regulatory region sequence-specific DNA binding activity\; and transcription coactivator activity. Is expressed in head neurons and intestine.…
WBGene00000432	ceh-7	C34C6.8	N.A.	Is predicted to have DNA binding activity. Is expressed in head neurons and in male.
WBGene00000220	atf-2	K08F8.2	HGNC:NFIL3|Roundup;EnsEMBL-Compara;Panther;OrthoFinder;OrthoInspector;ParaSite-Compara	Is an ortholog of human NFIL3 (nuclear factor, interleukin 3 regulated). Exhibits RNA polymerase II regulatory region DNA binding activity. Is involved in negative regulation of transcription by RNA polymerase II. Is expressed in digestive tract\; egg-laying apparatus\; excretory system\; neurons\; and ventral nerve cord.
WBGene00011887	set-17	T21B10.5	HGNC:PRDM7|TreeFam;EnsEMBL-Compara;PhylomeDB;OrthoFinder;ParaSite-Compara	Is an ortholog of human PRDM7 (PR\/SET domain 7). Is predicted to have DNA-binding transcription factor activity\; RNA polymerase II regulatory region sequence-specific DNA binding activity\; and chromatin DNA binding activity. Is expressed in several structures, including body wall musculature\; excretory cell\; intestine\; primary spermatocyte\; and vulval muscle.
WBGene00012000	T24H10.1	T24H10.1	HGNC:TCEA2|OrthoInspector;EnsEMBL-Compara;PhylomeDB;Hieranoid;Panther;Roundup;Inparanoid;OrthoFinder;OMA;ParaSite-Compara, HGNC:TCEA3|EnsEMBL-Compara;OrthoInspector;PhylomeDB;Panther;Roundup;Inparanoid;OrthoFinder;OMA;ParaSite-Compara, HGNC:TCEANC|EnsEMBL-Compara;TreeFam;Panther;PhylomeDB;OrthoFinder;ParaSite-Compara, HGNC:TCEA1|OrthoInspector;EnsEMBL-Compara;PhylomeDB;Hieranoid;Panther;Roundup;I…	Is an ortholog of human TCEA1 (transcription elongation factor A1) and TCEA2 (transcription elongation factor A2). Is predicted to have DNA binding activity and zinc ion binding activity.
WBGene00001950	hlh-3	T24B8.6	HGNC:ASCL1|Panther;Roundup;TreeFam;Inparanoid;OrthoFinder;EnsEMBL-Compara, HGNC:ASCL2|TreeFam;Panther;Inparanoid;OrthoFinder, HGNC:ASCL4|Inparanoid;Panther;Roundup;OrthoFinder, HGNC:ASCL3|Panther;Roundup;EnsEMBL-Compara;OrthoFinder;ParaSite-Compara, HGNC:ASCL5|ParaSite-Compara	Is an ortholog of human ASCL1 (achaete-scute family bHLH transcription factor 1). Exhibits protein heterodimerization activity and sequence-specific DNA binding activity. Contributes to RNA polymerase II regulatory region sequence-specific DNA binding activity. Is involved in several processes, including generation of neurons\; regulation of oviposition\; and transcription by RNA polymerase II. L…
WBGene00001061	dpl-1	T23G7.1	HGNC:TFDP2|EnsEMBL-Compara;OrthoInspector;PhylomeDB;Panther;Roundup;OrthoFinder;ParaSite-Compara, HGNC:TFDP3|EnsEMBL-Compara;OrthoInspector;PhylomeDB;Panther;OrthoFinder, HGNC:TFDP1|EnsEMBL-Compara;OrthoInspector;PhylomeDB;Panther;Roundup;OrthoFinder;ParaSite-Compara	Is an ortholog of human TFDP1 (transcription factor Dp-1) and TFDP2 (transcription factor Dp-2). Exhibits protein C-terminus binding activity and transcription factor binding activity. Is involved in several processes, including negative regulation of G1\/S transition of mitotic cell cycle by negative regulation of transcription from RNA polymerase II promoter\; negative regulation of Ras protein…
WBGene00001952	hlh-6	T15H9.3	HGNC:ASCL3|OrthoInspector;EnsEMBL-Compara;PhylomeDB;Hieranoid;Panther;TreeFam;Inparanoid;OrthoFinder;ParaSite-Compara, HGNC:ASCL5|OrthoInspector;EnsEMBL-Compara;PhylomeDB;Panther;Inparanoid;OrthoFinder;ParaSite-Compara, HGNC:ASCL4|EnsEMBL-Compara;OrthoInspector;PhylomeDB;Panther;TreeFam;OrthoFinder;ParaSite-Compara, HGNC:ASCL1|ParaSite-Compara, HGNC:ASCL2|ParaSite-Compara	Is an ortholog of human ASCL3 (achaete-scute family bHLH transcription factor 3). Exhibits DNA-binding transcription factor activity, RNA polymerase II-specific. Is predicted to contribute to DNA-binding transcription factor activity. Is involved in several processes, including pharyngeal gland morphogenesis\; pharynx development\; and positive regulation of pharynx morphogenesis. Localizes to ce…
WBGene00003100	mab-3	Y53C12B.5	HGNC:DMRT3|ParaSite-Compara, HGNC:DMRT2|ParaSite-Compara, HGNC:DMRTC2|ParaSite-Compara, HGNC:DMRTB1|ParaSite-Compara, HGNC:DMRTC1|ParaSite-Compara, HGNC:DMRT1|ParaSite-Compara, HGNC:DMRTC1B|ParaSite-Compara	Exhibits RNA polymerase II cis-regulatory region sequence-specific DNA binding activity. Is involved in nematode male tail tip morphogenesis\; positive regulation of nematode male tail tip morphogenesis\; and regulation of transcription by RNA polymerase II. Is expressed in ADF\; SMD\; and in male.
WBGene00013147	eyg-1	Y53C12C.1	HGNC:RHOXF1|ParaSite-Compara, HGNC:PROP1|ParaSite-Compara, HGNC:PAX2|ParaSite-Compara, HGNC:ALX4|ParaSite-Compara, HGNC:GSC2|ParaSite-Compara, HGNC:PRRX2|ParaSite-Compara, HGNC:OTX1|ParaSite-Compara, HGNC:SEBOX|ParaSite-Compara, HGNC:ALX3|ParaSite-Compara, HGNC:PAX6|ParaSite-Compara, HGNC:HESX1|ParaSite-Compara, HGNC:OTX2|ParaSite-Compara, HGNC:ALX1|ParaSite-Compara, HGNC:RHOXF2|ParaSite-Compara,…	Is predicted to have DNA binding activity. Is expressed in head and pharynx. Human ortholog(s) of this gene are implicated in several diseases, including Leri-Weill dyschondrosteosis\; diabetes mellitus (multiple)\; and eye disease (multiple).
WBGene00006744	unc-4	F26C11.2	HGNC:UNCX|EnsEMBL-Compara;OrthoInspector;Roundup;OrthoFinder, HGNC:RHOXF1|ParaSite-Compara, HGNC:PROP1|ParaSite-Compara, HGNC:PAX2|ParaSite-Compara, HGNC:ALX4|ParaSite-Compara, HGNC:GSC2|ParaSite-Compara, HGNC:PRRX2|ParaSite-Compara, HGNC:OTX1|ParaSite-Compara, HGNC:SEBOX|ParaSite-Compara, HGNC:ALX3|ParaSite-Compara, HGNC:PAX6|ParaSite-Compara, HGNC:HESX1|ParaSite-Compara, HGNC:OTX2|ParaSite-Comp…	Is an ortholog of human UNCX (UNC homeobox). Exhibits DNA-binding transcription factor activity. Is involved in several processes, including nervous system development\; regulation of synapse structure or activity\; and synaptic vesicle transport. Localizes to axon and nucleus. Is expressed in neurons and ventral nerve cord. Human ortholog(s) of this gene are implicated in several diseases, inclu…
WBGene00003939	pax-3	F27E5.2	HGNC:PAX3|TreeFam;EnsEMBL-Compara;Roundup;OrthoFinder;Panther, HGNC:PAX7|Panther;Roundup;EnsEMBL-Compara;OrthoFinder, HGNC:RHOXF1|ParaSite-Compara, HGNC:OTX2|ParaSite-Compara, HGNC:DMBX1|ParaSite-Compara, HGNC:ALX3|ParaSite-Compara, HGNC:ALX4|ParaSite-Compara, HGNC:ARX|ParaSite-Compara, HGNC:EVX1|ParaSite-Compara, HGNC:ESX1|ParaSite-Compara, HGNC:RHOXF2B|ParaSite-Compara, HGNC:PAX4|ParaSite-Compa…	Is an ortholog of human PAX3 (paired box 3). Is predicted to have DNA binding activity. Is involved in hemidesmosome assembly. Is expressed in several structures, including AB lineage cell\; E lineage cell\; P9\/10L\; hypodermal cell\; and tail. Human ortholog(s) of this gene are implicated in several diseases, including Leri-Weill dyschondrosteosis\; diabetes mellitus (multiple)\; and eye diseas…
WBGene00001207	egl-43	R53.3	HGNC:MECOM|OrthoInspector;EnsEMBL-Compara;PhylomeDB;Hieranoid;Panther;Roundup;TreeFam;Inparanoid;OrthoFinder;ParaSite-Compara, HGNC:PRDM16|EnsEMBL-Compara;PhylomeDB;Hieranoid;Roundup;TreeFam;Inparanoid;OrthoFinder;Panther	Is an ortholog of human MECOM (MDS1 and EVI1 complex locus). Is predicted to have DNA-binding transcription factor activity. Is involved in regulation of cell migration and regulation of neuron differentiation. Localizes to nucleus. Is expressed in several structures, including MSaaap\; MSpaap\; gonad\; neurons\; and somatic gonad precursor.
WBGene00000914	daf-19	F33H1.1	HGNC:RFX2|EnsEMBL-Compara;OrthoInspector;PhylomeDB;Panther;Roundup;TreeFam;Inparanoid;Hieranoid;OrthoFinder;ParaSite-Compara, HGNC:RFX3|EnsEMBL-Compara;OrthoInspector;PhylomeDB;Panther;Roundup;TreeFam;Inparanoid;Hieranoid;OrthoFinder;ParaSite-Compara, HGNC:RFX1|EnsEMBL-Compara;OrthoInspector;PhylomeDB;Panther;Roundup;TreeFam;Inparanoid;Hieranoid;OrthoFinder;ParaSite-Compara	Is an ortholog of human RFX1 (regulatory factor X1)\; RFX2 (regulatory factor X2)\; and RFX3 (regulatory factor X3). Is predicted to have DNA-binding transcription factor activity and RNA polymerase II cis-regulatory region sequence-specific DNA binding activity. Is involved in positive regulation of transcription by RNA polymerase II and regulation of non-motile cilium assembly. Localizes to nuc…
WBGene00007416	ceh-57	C07E3.5	N.A.	Is predicted to have DNA binding activity. Is expressed in dorsal nerve cord\; intestine\; and ventral nerve cord.
WBGene00007417	ceh-58	C07E3.6	N.A.	Is predicted to have DNA binding activity. Is expressed in dorsal nerve cord\; head neurons\; nerve ring\; tail neurons\; and ventral nerve cord.
WBGene00011069	ceh-62	R06F6.6	ENSG00000180806|EnsEMBL-Compara;PhylomeDB;ParaSite-Compara, HGNC:HOXD10|EnsEMBL-Compara;PhylomeDB;ParaSite-Compara, HGNC:HOXD11|ParaSite-Compara, HGNC:TLX3|ParaSite-Compara, HGNC:HOXD9|ParaSite-Compara, HGNC:HOXD8|ParaSite-Compara, HGNC:TLX2|ParaSite-Compara, HGNC:HOXA7|ParaSite-Compara, HGNC:HOXA10|ParaSite-Compara, HGNC:HOXA5|ParaSite-Compara, HGNC:HOXD1|ParaSite-Compara, HGNC:HOXB7|ParaSite-Co…	Is an ortholog of human HOXC9 (homeobox C9) and HOXD10 (homeobox D10). Is predicted to have DNA binding activity. Is expressed in dorsal nerve cord\; neurons\; tail neurons\; and ventral nerve cord. Human ortholog(s) of this gene are implicated in several diseases, including Guttmacher syndrome\; diabetes mellitus (multiple)\; and dysostosis (multiple).
WBGene00004096	pqm-1	F40F8.7	N.A.	Is predicted to have nucleic acid binding activity. Is involved in defense response to Gram-negative bacterium\; determination of adult lifespan\; and innate immune response. Localizes to cytoplasm and nucleus. Is expressed in head muscle\; head neurons\; and pseudocoelom.
WBGene00006853	unc-130	C47G2.2	HGNC:FOXD4L5|TreeFam;OrthoInspector;Inparanoid;OrthoFinder;EnsEMBL-Compara;Panther;ParaSite-Compara, HGNC:FOXD1|Hieranoid;TreeFam;OrthoFinder;EnsEMBL-Compara;Panther, HGNC:FOXD4L6|Inparanoid;TreeFam;OrthoInspector;OrthoFinder;EnsEMBL-Compara;Panther;ParaSite-Compara, HGNC:FOXD4L1|OrthoInspector;PhylomeDB;TreeFam;Inparanoid;OrthoFinder;EnsEMBL-Compara;Panther;ParaSite-Compara, HGNC:FOXD4L3|TreeFam…	Is an ortholog of human FOXD4 (forkhead box D4). Exhibits RNA polymerase II regulatory region sequence-specific DNA binding activity and transcription corepressor activity. Is involved in several processes, including axon extension involved in axon guidance\; negative regulation of transcription by RNA polymerase II\; and nematode male tail tip morphogenesis. Localizes to nucleus. Is expressed in…
WBGene00003015	lin-29	W03C9.4	HGNC:ZNF362|OrthoInspector;EnsEMBL-Compara;Roundup;PhylomeDB;OrthoFinder;ParaSite-Compara, HGNC:ZNF384|EnsEMBL-Compara;OrthoInspector;OrthoFinder;PhylomeDB, ENSG00000267477|ParaSite-Compara, HGNC:ZFP91-CNTF|ParaSite-Compara, HGNC:ZBTB32|ParaSite-Compara, HGNC:VEZF1|ParaSite-Compara, HGNC:ZNF281|ParaSite-Compara, HGNC:ZNF653|ParaSite-Compara, HGNC:ZBTB1|ParaSite-Compara, HGNC:ZNF148|ParaSite-Compa…	Is an ortholog of human ZNF362 (zinc finger protein 362). Exhibits RNA polymerase II regulatory region sequence-specific DNA binding activity. Is involved in regulation of development, heterochronic\; regulation of nematode larval development\; and regulation of programmed cell death. Localizes to nucleus. Is expressed in several structures, including R2_hyp\; gonad\; hypodermis\; neurons\; and p…
WBGene00005013	jmjd-1.1	F43G6.6	HGNC:PHF2|EnsEMBL-Compara;Hieranoid;Panther;TreeFam;OrthoFinder;ParaSite-Compara, HGNC:KDM7A|EnsEMBL-Compara;OrthoInspector;Hieranoid;Panther;Roundup;TreeFam;OrthoFinder;ParaSite-Compara, HGNC:PHF8|EnsEMBL-Compara;Hieranoid;Panther;Roundup;TreeFam;OrthoFinder;ParaSite-Compara, HGNC:KDM2A|ParaSite-Compara, HGNC:KDM2B|ParaSite-Compara	Is an ortholog of human KDM7A (lysine demethylase 7A). Is predicted to have metal ion binding activity. Human ortholog(s) of this gene are implicated in syndromic X-linked intellectual disability Siderius type.
WBGene00013276	sre-42	Y57A10B.4	N.A.	Is affected by several genes including let-60\; spn-4\; and cyc-1 based on microarray and RNA-seq studies. Is affected by tetrabromobisphenol A and allantoin based on microarray studies. Is predicted to encode a protein with the following domains: C. elegans Sre G protein-coupled chemoreceptor and 7TM GPCR, serpentine receptor class e (Sre).
WBGene00012330	zip-3	W07G1.3	HGNC:ATF5|Inparanoid;Roundup;OrthoInspector;Panther, HGNC:ATF4|OrthoInspector;Panther;Roundup	Is an ortholog of human ATF5 (activating transcription factor 5). Is predicted to have DNA-binding transcription factor activity, RNA polymerase II-specific and RNA polymerase II regulatory region sequence-specific DNA binding activity.
WBGene00007242	madf-5	C01G12.1	N.A.	Is enriched in dopaminergic neurons\; hypodermis\; mechanosensory neurons\; and pharynx based on microarray\; tiling array\; and RNA-seq studies. Is affected by several genes including daf-16\; daf-12\; and hsf-1 based on microarray and RNA-seq studies. Is affected by seven chemicals including stavudine\; Zidovudine\; and Tunicamycin based on RNA-seq and microarray studies. Is predicted to encode…
WBGene00003510	mxl-2	F40G9.11	HGNC:MLX|OrthoInspector;PhylomeDB;Hieranoid;Panther;Roundup;TreeFam;Inparanoid;OrthoFinder;EnsEMBL-Compara;OMA;ParaSite-Compara, HGNC:MLXIPL|ParaSite-Compara, HGNC:MLXIP|ParaSite-Compara	Is an ortholog of human Mlx. Is predicted to have DNA-binding transcription factor activity. Is involved in determination of adult lifespan and negative regulation of gene expression. Localizes to cytoplasm and nucleus. Is expressed in hypodermis and intestine. Human ortholog(s) of this gene are implicated in Williams-Beuren syndrome.
WBGene00019327	zip-2	K02F3.4	HGNC:CEBPE|ParaSite-Compara, HGNC:CEBPA|ParaSite-Compara, HGNC:CEBPG|ParaSite-Compara, HGNC:CEBPD|ParaSite-Compara, HGNC:CEBPB|ParaSite-Compara	Is predicted to have DNA-binding transcription factor activity. Is involved in several processes, including defense response to Gram-negative bacterium\; positive regulation of innate immune response\; and transcription by RNA polymerase II. Is expressed in pharynx. Human ortholog(s) of this gene are implicated in acute myeloid leukemia.
WBGene00020102	R148.3	R148.3	N.A.	Is expressed in body wall musculature\; neurons\; and pharynx. Is predicted to encode a protein with the following domain: Phosphorylation site.
WBGene00003033	lin-48	F34D10.5	HGNC:OVOL1|OrthoInspector;EnsEMBL-Compara;PhylomeDB;Panther;Roundup;TreeFam;Inparanoid;OrthoFinder;ParaSite-Compara, HGNC:OVOL3|TreeFam;EnsEMBL-Compara;PhylomeDB;Panther;OrthoFinder;ParaSite-Compara, HGNC:OVOL2|OrthoInspector;EnsEMBL-Compara;PhylomeDB;Panther;Roundup;TreeFam;Inparanoid;OrthoFinder, HGNC:ZSCAN5A|ParaSite-Compara, HGNC:ZSCAN29|ParaSite-Compara, HGNC:SCAND1|ParaSite-Compara, HGNC:ZS…	Is an ortholog of human OVOL1 (ovo like transcriptional repressor 1). Is predicted to have DNA-binding transcription activator activity, RNA polymerase II-specific\; DNA-binding transcription repressor activity, RNA polymerase II-specific\; and sequence-specific DNA binding activity. Is involved in hindgut morphogenesis and nematode male tail tip morphogenesis. Localizes to nucleus. Is expressed …
WBGene00006959	xbp-1	R74.3	HGNC:XBP1|EnsEMBL-Compara;OrthoInspector;Roundup;TreeFam;OrthoFinder;Panther	Is an ortholog of human XBP1 (X-box binding protein 1). Exhibits RNA polymerase II regulatory region sequence-specific DNA binding activity. Is involved in several processes, including age-dependent general metabolic decline\; endoplasmic reticulum unfolded protein response\; and response to tunicamycin. Localizes to nucleus. Is expressed widely.
WBGene00007980	C36E8.1	C36E8.1	HGNC:RRN3|OrthoInspector;EnsEMBL-Compara;PhylomeDB;Hieranoid;Panther;Roundup;Inparanoid;OrthoFinder;OMA;ParaSite-Compara	Is an ortholog of human RRN3 (RRN3 homolog, RNA polymerase I transcription factor). Is predicted to have RNA polymerase I core binding activity and RNA polymerase I general transcription initiation factor activity.
WBGene00011368	tftc-5	T02C12.3	HGNC:GTF3C5|OrthoInspector;EnsEMBL-Compara;PhylomeDB;Hieranoid;Panther;Roundup;TreeFam;OrthoFinder;Inparanoid;OMA;ParaSite-Compara	Is an ortholog of human GTF3C5 (general transcription factor IIIC subunit 5). Is predicted to contribute to RNA polymerase III transcription regulator recruiting activity\; RNA polymerase III type 1 promoter sequence-specific DNA binding activity\; and RNA polymerase III type 2 promoter sequence-specific DNA binding activity.
WBGene00000463	ceh-43	C28A5.4	HGNC:DLX3|EnsEMBL-Compara;OrthoInspector;PhylomeDB;Panther;Inparanoid;OrthoFinder;ParaSite-Compara, HGNC:DLX5|EnsEMBL-Compara;OrthoInspector;PhylomeDB;Panther;Inparanoid;OrthoFinder;ParaSite-Compara, HGNC:DLX6|OrthoInspector;EnsEMBL-Compara;PhylomeDB;Panther;Roundup;TreeFam;Inparanoid;OrthoFinder, HGNC:DLX2|EnsEMBL-Compara;OrthoInspector;PhylomeDB;Panther;Inparanoid;OrthoFinder;ParaSite-Compara, …	Is an ortholog of human DLX1 (distal-less homeobox 1) and DLX6 (distal-less homeobox 6). Is predicted to have DNA-binding transcription factor activity and RNA polymerase II cis-regulatory region sequence-specific DNA binding activity. Is involved in embryo development. Is expressed in several structures, including CAN\; anterior hypodermis\; ganglia\; neuronal sheath cell\; and somatic nervous s…
WBGene00003912	pal-1	C38D4.6	HGNC:CDX2|OrthoInspector;EnsEMBL-Compara;Panther;Roundup;OrthoFinder, HGNC:CDX1|OrthoInspector;EnsEMBL-Compara;PhylomeDB;Panther;Roundup;OrthoFinder;ParaSite-Compara, HGNC:CDX4|EnsEMBL-Compara;OrthoInspector;Panther;Roundup;OrthoFinder;ParaSite-Compara	Is an ortholog of human CDX1 (caudal type homeobox 1). Exhibits DNA-binding transcription factor activity, RNA polymerase II-specific and RNA polymerase II regulatory region sequence-specific DNA binding activity. Is involved in several processes, including ectodermal cell fate commitment\; muscle cell fate commitment\; and positive regulation of transcription by RNA polymerase II. Localizes to c…
WBGene00001437	fkh-5	F26A1.2	N.A.	Exhibits RNA polymerase II regulatory region sequence-specific DNA binding activity. Is expressed in head neurons.
WBGene00006543	tbx-2	F21H11.3	HGNC:TBX6|Hieranoid;Panther;Inparanoid, HGNC:TBX2|OrthoInspector;PhylomeDB;Panther;Roundup;TreeFam;OrthoFinder, HGNC:TBX3|OrthoInspector;PhylomeDB;Panther;Roundup;TreeFam;OrthoFinder	Is an ortholog of human TBX2 (T-box transcription factor 2) and TBX3 (T-box transcription factor 3). Exhibits enzyme binding activity. Is involved in several processes, including muscle cell fate specification\; olfactory behavior\; and pharyngeal muscle development. Localizes to cytoplasm and nucleus. Is expressed in amphid neurons\; body wall musculature\; head neurons\; and pharynx.
WBGene00016167	vps-22	C27F2.5	HGNC:SNF8|EnsEMBL-Compara;OrthoInspector;PhylomeDB;Hieranoid;Panther;Roundup;Inparanoid;OrthoFinder;OMA;ParaSite-Compara	Is an ortholog of human SNF8 (SNF8 subunit of ESCRT-II). Is expressed in body wall musculature\; pharyngeal muscle cell\; and vulval muscle. Is predicted to encode a protein with the following domains: EAP30\/Vps36 family\; ESCRT-2 complex, Snf8\; Winged helix-like DNA-binding domain superfamily\; Winged helix DNA-binding domain superfamily\; and Snf8\/Vps36 family.
WBGene00000561	cnd-1	C34E10.7	HGNC:NEUROD1|Roundup;OrthoInspector;Inparanoid;OrthoFinder;EnsEMBL-Compara;ParaSite-Compara, HGNC:NEUROD2|Inparanoid;OrthoInspector;OrthoFinder;EnsEMBL-Compara, HGNC:NEUROD6|Inparanoid;OrthoInspector;Roundup;OrthoFinder;EnsEMBL-Compara;ParaSite-Compara, ENSG00000123307|Roundup;OrthoInspector;Inparanoid;OrthoFinder;EnsEMBL-Compara;ParaSite-Compara, HGNC:ATOH1|ParaSite-Compara, HGNC:NEUROG2|ParaSit…	Is an ortholog of human NEUROD1 (neuronal differentiation 1)\; NEUROD4 (neuronal differentiation 4)\; and NEUROD6 (neuronal differentiation 6). Is predicted to have DNA-binding transcription factor activity. Is involved in axonal fasciculation. Localizes to nucleus. Is expressed in several structures, including ABalpapaa\; ABalppapa\; ABplaapaa\; ABplppaap\; and neuroblasts. Human ortholog(s) of …
WBGene00000435	ceh-10	W03A3.1	HGNC:VSX1|OrthoInspector;EnsEMBL-Compara;PhylomeDB;Hieranoid;Roundup;TreeFam;Inparanoid;OrthoFinder, HGNC:VSX2|OrthoInspector;EnsEMBL-Compara;PhylomeDB;Hieranoid;Roundup;TreeFam;OrthoFinder;Inparanoid, HGNC:RHOXF1|ParaSite-Compara, HGNC:PROP1|ParaSite-Compara, HGNC:ALX4|ParaSite-Compara, HGNC:GSC2|ParaSite-Compara, HGNC:PRRX2|ParaSite-Compara, HGNC:OTX1|ParaSite-Compara, HGNC:SEBOX|ParaSite-Compa…	Is an ortholog of human VSX1 (visual system homeobox 1) and VSX2 (visual system homeobox 2). Is predicted to have DNA-binding transcription factor activity, RNA polymerase II-specific and RNA polymerase II regulatory region sequence-specific DNA binding activity. Is involved in generation of neurons\; oviposition\; and regulation of cell migration. Localizes to nucleus. Is expressed in ABalapppaa…
WBGene00006547	tbx-11	F40H6.4	HGNC:TBX21|TreeFam;Inparanoid;PhylomeDB;Panther, HGNC:TBR1|TreeFam;Inparanoid;PhylomeDB;Panther;ParaSite-Compara, HGNC:EOMES|TreeFam;Inparanoid;PhylomeDB;Panther;ParaSite-Compara, HGNC:TBX6|ParaSite-Compara, HGNC:TBX19|ParaSite-Compara, HGNC:TBX22|ParaSite-Compara, HGNC:TBXT|ParaSite-Compara, HGNC:TBX15|ParaSite-Compara, HGNC:TBX2|ParaSite-Compara, HGNC:TBX10|ParaSite-Compara, HGNC:TBX20|ParaSite…	Is an ortholog of human EOMES (eomesodermin) and TBR1 (T-box brain transcription factor 1). Is predicted to have DNA-binding transcription activator activity, RNA polymerase II-specific\; RNA polymerase II activating transcription factor binding activity\; and RNA polymerase II regulatory region sequence-specific DNA binding activity. Human ortholog(s) of this gene are implicated in several disea…
WBGene00017158	hpo-10	F01F1.1	HGNC:LENG8|EnsEMBL-Compara;PhylomeDB;Hieranoid;Panther;Roundup;TreeFam;OrthoFinder;Inparanoid;OMA;OrthoInspector;ParaSite-Compara	Is an ortholog of human LENG8 (leukocyte receptor cluster member 8). Is expressed widely. Is predicted to encode a protein with the following domains: Phosphorylation site\; SAC3\/GANP family\; and SAC3\/GANP\/THP3.
WBGene00022695	ZK328.6	ZK328.6	N.A.	Is predicted to have DNA-binding transcription activator activity, RNA polymerase II-specific\; RNA polymerase II activating transcription factor binding activity\; and RNA polymerase II regulatory region sequence-specific DNA binding activity.
WBGene00015145	arle-14	B0336.5	HGNC:ARL14EP|Roundup;TreeFam;OrthoFinder;PhylomeDB;OrthoInspector;Panther, HGNC:ARL14EPL|Roundup;Inparanoid;OrthoFinder;OrthoInspector	Is an ortholog of human ARL14EP (ADP ribosylation factor like GTPase 14 effector protein). Is predicted to encode a protein with the following domains: ARF7 effector protein C-terminus\; ARL14 effector protein\; and ARF7 effector protein, C-terminal.
WBGene00016200	dpff-1	C28H8.9	HGNC:DPF1|EnsEMBL-Compara;PhylomeDB;Panther;Roundup;TreeFam;Inparanoid;OrthoFinder;OrthoInspector;Hieranoid, HGNC:DPF2|EnsEMBL-Compara;PhylomeDB;Panther;Roundup;TreeFam;Inparanoid;OrthoFinder;OrthoInspector;Hieranoid, HGNC:DPF3|EnsEMBL-Compara;OrthoInspector;PhylomeDB;Panther;Roundup;TreeFam;Inparanoid;OrthoFinder;Hieranoid;ParaSite-Compara	Is an ortholog of human DPF3 (double PHD fingers 3). Is predicted to have histone acetyltransferase activity and histone binding activity. Is expressed widely. Is used to study alcohol use disorder.
WBGene00007048	nfx-1	C16A3.7	HGNC:NFX1|EnsEMBL-Compara;OrthoInspector;PhylomeDB;Hieranoid;Panther;Roundup;TreeFam;Inparanoid;OMA;OrthoFinder;ParaSite-Compara	Is an ortholog of human NFX1 (nuclear transcription factor, X-box binding 1). Is predicted to have DNA-binding transcription factor activity, RNA polymerase II-specific and RNA polymerase II regulatory region sequence-specific DNA binding activity.
WBGene00015486	popl-1	C05D11.9	HGNC:POP1|EnsEMBL-Compara;OrthoInspector;PhylomeDB;Hieranoid;Panther;Roundup;TreeFam;OrthoFinder;Inparanoid;ParaSite-Compara	Is an ortholog of human POP1 (POP1 homolog, ribonuclease P\/MRP subunit). Is predicted to have ribonuclease MRP activity and ribonuclease P activity.
WBGene00020821	jhdm-1	T26A5.5	HGNC:KDM2A|OrthoInspector;PhylomeDB;Panther;Roundup;Inparanoid;OrthoFinder;ParaSite-Compara, HGNC:KDM2B|OrthoInspector;PhylomeDB;Panther;Roundup;OrthoFinder;Inparanoid;EnsEMBL-Compara;ParaSite-Compara, HGNC:PHF2|ParaSite-Compara, HGNC:KDM7A|ParaSite-Compara, HGNC:PHF8|ParaSite-Compara	Is an ortholog of human KDM2B (lysine demethylase 2B). Is predicted to have histone demethylase activity (H3-K36 specific) and metal ion binding activity. Human ortholog(s) of this gene are implicated in syndromic X-linked intellectual disability Siderius type.
WBGene00000443	ceh-20	F31E3.1	HGNC:PBX4|EnsEMBL-Compara;Panther;OrthoFinder, HGNC:PBX2|EnsEMBL-Compara;Panther;OrthoFinder;ParaSite-Compara, HGNC:TGIF2LX|ParaSite-Compara, HGNC:TGIF2LY|ParaSite-Compara, HGNC:TGIF2|ParaSite-Compara, HGNC:PKNOX2|ParaSite-Compara, HGNC:MEIS1|ParaSite-Compara	Is an ortholog of human PBX2 (PBX homeobox 2). Exhibits RNA polymerase II transcription coactivator binding activity and cis-regulatory region sequence-specific DNA binding activity. Contributes to RNA polymerase II regulatory region sequence-specific DNA binding activity. Is involved in several processes, including mesodermal cell fate specification\; positive regulation of mesodermal cell fate …
WBGene00017755	zip-8	F23F12.9	N.A.	Is predicted to have DNA-binding transcription factor activity. Is expressed in intestinal cell.
WBGene00003378	mml-1	T20B12.6	HGNC:MLXIP|EnsEMBL-Compara;OrthoInspector;PhylomeDB;Hieranoid;Panther;Roundup;TreeFam;OrthoFinder;Inparanoid;OMA, HGNC:MLXIPL|OrthoInspector;EnsEMBL-Compara;PhylomeDB;Hieranoid;Panther;Roundup;TreeFam;OrthoFinder;Inparanoid;OMA	Is an ortholog of human MLXIP (MLX interacting protein) and MLXIPL (MLX interacting protein like). Is predicted to have DNA-binding transcription factor activity. Is involved in determination of adult lifespan and negative regulation of transcription by RNA polymerase II. Localizes to mitochondrion and nucleus. Is expressed in excretory cell\; hypodermis\; intestine\; and muscle cell.
WBGene00003845	odd-1	B0280.4	HGNC:OSR1|EnsEMBL-Compara;OrthoInspector;PhylomeDB;Panther;Roundup;TreeFam;ParaSite-Compara, HGNC:OSR2|OrthoInspector;EnsEMBL-Compara;PhylomeDB;Panther;Roundup;TreeFam;ParaSite-Compara	Is an ortholog of human OSR1 (odd-skipped related transcription factor 1) and OSR2 (odd-skipped related transciption factor 2). Is predicted to have RNA polymerase II regulatory region sequence-specific DNA binding activity. Is expressed in intestine.
WBGene00006542	tbp-1	T20B12.2	HGNC:TBP|EnsEMBL-Compara;OrthoInspector;PhylomeDB;Hieranoid;Panther;Roundup;Inparanoid;OrthoFinder, HGNC:TBPL2|OrthoInspector;EnsEMBL-Compara;PhylomeDB;Hieranoid;Panther;Roundup;Inparanoid;OrthoFinder	Is an ortholog of human TBP (TATA-box binding protein) and TBPL2 (TATA-box binding protein like 2). Exhibits AT DNA binding activity\; DNA-binding transcription factor activity\; and transcription factor binding activity. Is involved in positive regulation of transcription, DNA-templated. Localizes to nucleus. Is expressed in gonad.
WBGene00003376	mls-1	H14A12.4	HGNC:TBX10|Panther;Inparanoid;EnsEMBL-Compara;OrthoFinder, HGNC:TBX1|EnsEMBL-Compara;OrthoInspector;Panther;Roundup;Inparanoid;OrthoFinder, HGNC:TBX18|ParaSite-Compara	Is an ortholog of human TBX1 (T-box transcription factor 1). Is predicted to have DNA-binding transcription activator activity, RNA polymerase II-specific\; RNA polymerase II activating transcription factor binding activity\; and RNA polymerase II regulatory region sequence-specific DNA binding activity. Is involved in muscle cell fate specification and post-embryonic development. Localizes to nu…
WBGene00003024	lin-39	C07H6.7	HGNC:HOXA4|Panther;EnsEMBL-Compara;OrthoInspector;ParaSite-Compara, HGNC:HOXB5|Inparanoid;OrthoInspector;Roundup;Hieranoid;ParaSite-Compara, HGNC:HOXC4|Panther;OrthoInspector;EnsEMBL-Compara;ParaSite-Compara, HGNC:HOXD4|Panther;OrthoInspector;EnsEMBL-Compara;ParaSite-Compara, HGNC:HOXA5|Roundup;OrthoInspector;Inparanoid;EnsEMBL-Compara;Hieranoid;ParaSite-Compara, HGNC:HOXC5|Hieranoid;OrthoInspect…	Is an ortholog of human HOXA5 (homeobox A5). Exhibits cis-regulatory region sequence-specific DNA binding activity. Is involved in several processes, including positive regulation of mesodermal cell fate specification\; positive regulation of transcription, DNA-templated\; and positive regulation of vulval development. Localizes to nucleus. Is expressed in several structures, including hypodermis…
WBGene00000437	ceh-13	R13A5.5	HGNC:HOXD1|Inparanoid;Panther;Roundup;PhylomeDB;EnsEMBL-Compara;OrthoFinder;ParaSite-Compara, HGNC:HOXA1|Inparanoid;Panther;Roundup;PhylomeDB;EnsEMBL-Compara;ParaSite-Compara, HGNC:HOXB1|OrthoInspector;PhylomeDB;Panther;Roundup;Inparanoid;OrthoFinder;EnsEMBL-Compara;ParaSite-Compara, HGNC:HOXD11|ParaSite-Compara, HGNC:TLX3|ParaSite-Compara, HGNC:HOXD9|ParaSite-Compara, HGNC:HOXA10|ParaSite-Compar…	Is an ortholog of human HOXB1 (homeobox B1). Is predicted to have DNA-binding transcription factor activity. Is involved in cell-cell adhesion and embryo development. Localizes to cytoplasm and nucleus. Is expressed in several structures, including egg-laying apparatus\; hypodermis\; sensory neurons\; somatic nervous system\; and in male. Human ortholog(s) of this gene are implicated in several d…
WBGene00001174	egl-5	C08C3.1	HGNC:HOXB7|Hieranoid;Panther;ParaSite-Compara, HGNC:HOXA7|Hieranoid;Panther;ParaSite-Compara, HGNC:CDK18|EnsEMBL-Compara;OrthoFinder, HGNC:HOXD8|EnsEMBL-Compara;OrthoFinder;ParaSite-Compara, HGNC:HOXB8|EnsEMBL-Compara;OrthoFinder;ParaSite-Compara, HGNC:HOXD11|ParaSite-Compara, HGNC:TLX3|ParaSite-Compara, HGNC:HOXD9|ParaSite-Compara, HGNC:HOXA10|ParaSite-Compara, HGNC:HOXD10|ParaSite-Compara, HGNC…	Is an ortholog of several human genes including HOXA7 (homeobox A7)\; HOXB7 (homeobox B7)\; and HOXD8 (homeobox D8). Exhibits transcription factor binding activity. Is involved in several processes, including anterior\/posterior pattern specification\; nematode male tail tip morphogenesis\; and regulation of transcription by RNA polymerase II. Localizes to nucleus. Is expressed in several structu…
WBGene00003102	mab-5	C08C3.3	HGNC:HOXC6|Hieranoid;Roundup;EnsEMBL-Compara;OrthoInspector;OrthoFinder, HGNC:HOXB6|Hieranoid;Roundup;EnsEMBL-Compara;OrthoInspector;OrthoFinder;ParaSite-Compara, HGNC:HOXB4|EnsEMBL-Compara;Panther;OrthoFinder, HGNC:HOXA6|Hieranoid;Roundup;OrthoInspector;EnsEMBL-Compara;OrthoFinder;ParaSite-Compara, HGNC:HOXA5|TreeFam;EnsEMBL-Compara;OrthoFinder;OrthoInspector;ParaSite-Compara, HGNC:HOXA4|OrthoIn…	Is an ortholog of human HOXA6 (homeobox A6) and HOXB6 (homeobox B6). Contributes to RNA polymerase II regulatory region sequence-specific DNA binding activity. Is involved in several processes, including nematode male tail tip morphogenesis\; neuroblast migration\; and regulation of transcription by RNA polymerase II. Localizes to RNA polymerase II transcription factor complex. Is expressed in se…
WBGene00000446	ceh-23	ZK652.5	HGNC:NANOG|ParaSite-Compara, HGNC:DLX3|ParaSite-Compara, HGNC:DLX2|ParaSite-Compara, HGNC:NANOGP8|ParaSite-Compara, HGNC:DLX5|ParaSite-Compara, HGNC:BSX|ParaSite-Compara, HGNC:DLX4|ParaSite-Compara, HGNC:DLX1|ParaSite-Compara	Is predicted to have DNA-binding transcription factor activity and RNA polymerase II cis-regulatory region sequence-specific DNA binding activity. Is involved in determination of adult lifespan and positive regulation of transcription from RNA polymerase II promoter involved in neuron differentiation. Localizes to nucleus. Is expressed in intestine\; nervous system\; and tail. Human ortholog(s) o…
WBGene00003559	ncl-1	ZK112.2	HGNC:TRIM3|TreeFam;Roundup;OMA;Panther, HGNC:TRIM2|TreeFam;Roundup;OMA;Panther, HGNC:TRIM6-TRIM34|ParaSite-Compara, HGNC:TRIM61|ParaSite-Compara, HGNC:TRIM60|ParaSite-Compara, HGNC:TRIM50|ParaSite-Compara, HGNC:TRIM36|ParaSite-Compara, HGNC:TRIM54|ParaSite-Compara, HGNC:TRIM69|ParaSite-Compara, HGNC:TRIM41|ParaSite-Compara, HGNC:TRIM51|ParaSite-Compara, HGNC:TRIM35|ParaSite-Compara, HGNC:TRIM64B|…	Is an ortholog of human TRIM2 (tripartite motif containing 2) and TRIM3 (tripartite motif containing 3). Exhibits translation repressor activity. Is involved in several processes, including negative regulation of ribosome biogenesis\; negative regulation of transcription, DNA-templated\; and nucleologenesis. Localizes to cytoplasm. Is expressed in head and tail. Human ortholog(s) of this gene are…
WBGene00000448	pros-1	K12H4.1	HGNC:PROX1|EnsEMBL-Compara;OrthoInspector;Panther;Roundup;TreeFam;Hieranoid;OrthoFinder;ParaSite-Compara, HGNC:PROX2|EnsEMBL-Compara;OrthoInspector;Panther;Roundup;TreeFam;Hieranoid;OrthoFinder;ParaSite-Compara	Is an ortholog of human PROX1 (prospero homeobox 1) and PROX2 (prospero homeobox 2). Is predicted to have DNA-binding transcription factor activity, RNA polymerase II-specific. Is expressed in excretory cell\; labial sensillum\; neuronal sheath cell\; and neurons.
WBGene00006818	unc-86	C30A5.7	HGNC:POU4F1|EnsEMBL-Compara;Panther;Roundup;TreeFam;Inparanoid;OrthoFinder;Hieranoid, HGNC:POU4F2|EnsEMBL-Compara;OrthoInspector;Panther;Roundup;TreeFam;OrthoFinder;Inparanoid;Hieranoid;ParaSite-Compara, HGNC:POU4F3|EnsEMBL-Compara;OrthoInspector;Panther;Roundup;TreeFam;Inparanoid;OrthoFinder;Hieranoid, HGNC:POU5F1|ParaSite-Compara, HGNC:POU2F1|ParaSite-Compara, HGNC:POU3F3|ParaSite-Compara, HGNC…	Is an ortholog of human POU4F2 (POU class 4 homeobox 2). Exhibits DNA-binding transcription factor activity, RNA polymerase II-specific\; RNA polymerase II regulatory region sequence-specific DNA binding activity\; and transcription factor binding activity. Is involved in mechanosensory behavior\; neuron development\; and positive regulation of transcription from RNA polymerase II promoter involv…
WBGene00000439	ceh-16	C13G5.1	HGNC:EN2|EnsEMBL-Compara;OrthoInspector;PhylomeDB;Panther;Roundup;OrthoFinder;ParaSite-Compara, HGNC:EN1|OrthoInspector;EnsEMBL-Compara;PhylomeDB;Panther;Roundup;OrthoFinder;ParaSite-Compara, HGNC:CPHXL|ParaSite-Compara, ENSG00000284484|ParaSite-Compara	Is an ortholog of human EN1 (engrailed homeobox 1) and EN2 (engrailed homeobox 2). Exhibits sequence-specific DNA binding activity. Is involved in several processes, including embryonic body morphogenesis\; epidermal cell fate specification\; and regulation of transcription by RNA polymerase II. Localizes to nucleus. Is expressed in several structures, including ABarpa\; ABplaa\; hyp5\; retrovesi…
WBGene00018833	ztf-1	F54F2.5	N.A.	Is predicted to have DNA binding activity and metal ion binding activity. Is expressed in intestine and pharyngeal neurons.
WBGene00001955	hlh-11	F58A4.7	HGNC:TFAP4|EnsEMBL-Compara;OrthoInspector;Panther;Inparanoid;OrthoFinder;Hieranoid;ParaSite-Compara	Is an ortholog of human TFAP4 (transcription factor AP-4). Is predicted to have DNA-binding transcription factor activity. Is expressed in excretory cell\; male-specific anatomical entity\; non-striated muscle\; pharynx\; and somatic nervous system.
WBGene00001951	hlh-4	T05G5.2	HGNC:ASCL4|EnsEMBL-Compara;Panther;Roundup, HGNC:ASCL3|Panther;EnsEMBL-Compara;Roundup;ParaSite-Compara, HGNC:ASCL1|ParaSite-Compara, HGNC:ASCL5|ParaSite-Compara	Is an ortholog of human ASCL3 (achaete-scute family bHLH transcription factor 3). Exhibits DNA-binding transcription factor activity, RNA polymerase II-specific and bHLH transcription factor binding activity. Is predicted to contribute to DNA-binding transcription factor activity. Is involved in positive regulation of transcription by RNA polymerase II. Localizes to RNA polymerase II transcriptio…
WBGene00014230	gtf-2H3	ZK1128.4	HGNC:GTF2H3|EnsEMBL-Compara;OrthoInspector;PhylomeDB;Hieranoid;Panther;Roundup;TreeFam;Inparanoid;OrthoFinder;OMA;ParaSite-Compara	Is an ortholog of human GTF2H3 (general transcription factor IIH subunit 3). Is predicted to contribute to DNA-dependent ATPase activity and RNA polymerase II CTD heptapeptide repeat kinase activity.
WBGene00006545	tbx-8	T07C4.2	HGNC:TBR1|TreeFam;Panther;Inparanoid;PhylomeDB;EnsEMBL-Compara;ParaSite-Compara, HGNC:EOMES|TreeFam;Panther;Inparanoid;PhylomeDB;EnsEMBL-Compara;ParaSite-Compara, HGNC:TBX21|TreeFam;Panther;Inparanoid;EnsEMBL-Compara, HGNC:TBX6|ParaSite-Compara, HGNC:TBX19|ParaSite-Compara, HGNC:TBX20|ParaSite-Compara, HGNC:TBXT|ParaSite-Compara, HGNC:MGA|ParaSite-Compara, HGNC:TBX15|ParaSite-Compara, HGNC:TBX4|P…	Is an ortholog of human EOMES (eomesodermin) and TBR1 (T-box brain transcription factor 1). Is predicted to have DNA-binding transcription activator activity, RNA polymerase II-specific\; RNA polymerase II activating transcription factor binding activity\; and RNA polymerase II regulatory region sequence-specific DNA binding activity. Is involved in embryonic body morphogenesis. Localizes to nucl…
WBGene00006546	tbx-9	T07C4.6	HGNC:TBR1|Panther;Inparanoid;PhylomeDB;EnsEMBL-Compara;ParaSite-Compara, HGNC:EOMES|Panther;Inparanoid;PhylomeDB;EnsEMBL-Compara;ParaSite-Compara, HGNC:TBX6|ParaSite-Compara, HGNC:TBX20|ParaSite-Compara, HGNC:TBXT|ParaSite-Compara, HGNC:MGA|ParaSite-Compara, HGNC:TBX19|ParaSite-Compara, HGNC:TBX15|ParaSite-Compara, HGNC:TBX4|ParaSite-Compara	Is an ortholog of human EOMES (eomesodermin) and TBR1 (T-box brain transcription factor 1). Exhibits RNA polymerase II regulatory region sequence-specific DNA binding activity. Is involved in embryonic body morphogenesis. Localizes to nucleus. Is expressed in several structures, including ABarpa\; Eal\; Ear\; Epl\; and Epr. Human ortholog(s) of this gene are implicated in adrenocorticotropic horm…
WBGene00006873	vab-7	M142.4	HGNC:EVX1|Panther;TreeFam;EnsEMBL-Compara;OrthoInspector;OrthoFinder;ParaSite-Compara, HGNC:EVX2|EnsEMBL-Compara;OrthoInspector;Panther;Roundup;TreeFam;OrthoFinder, HGNC:RHOXF1|ParaSite-Compara, HGNC:PROP1|ParaSite-Compara, HGNC:ALX4|ParaSite-Compara, HGNC:PRRX2|ParaSite-Compara, HGNC:OTX1|ParaSite-Compara, HGNC:SEBOX|ParaSite-Compara, HGNC:ALX3|ParaSite-Compara, HGNC:PAX6|ParaSite-Compara, HGNC:…	Is an ortholog of human EVX1 (even-skipped homeobox 1) and EVX2 (even-skipped homeobox 2). Is predicted to have DNA binding activity. Localizes to nucleus. Is expressed in muscle cell\; neurons\; somatic nervous system\; and tail hypodermis. Human ortholog(s) of this gene are implicated in several diseases, including WAGR syndrome\; diabetes mellitus (multiple)\; and eye disease (multiple).
WBGene00006552	tbx-33	Y66A7A.8	N.A.	Is predicted to have DNA-binding transcription activator activity, RNA polymerase II-specific\; RNA polymerase II activating transcription factor binding activity\; and RNA polymerase II regulatory region sequence-specific DNA binding activity.
WBGene00001235	elb-1	Y41C4A.10	HGNC:ELOB|EnsEMBL-Compara;OrthoInspector;PhylomeDB;Hieranoid;Panther;Roundup;TreeFam;Inparanoid;OrthoFinder;OMA;ParaSite-Compara	Is an ortholog of human ELOB (elongin B). Exhibits protein domain specific binding activity. Localizes to Cul2-RING ubiquitin ligase complex.
WBGene00006557	tbx-38	C24H11.3	HGNC:EOMES|Panther;TreeFam;EnsEMBL-Compara;PhylomeDB;ParaSite-Compara, HGNC:TBX21|Panther;TreeFam;EnsEMBL-Compara;PhylomeDB, HGNC:TBR1|Panther;TreeFam;EnsEMBL-Compara;PhylomeDB;ParaSite-Compara, HGNC:TBX6|ParaSite-Compara, HGNC:TBX19|ParaSite-Compara, HGNC:TBXT|ParaSite-Compara, HGNC:TBX15|ParaSite-Compara, HGNC:TBX20|ParaSite-Compara, HGNC:TBX4|ParaSite-Compara, HGNC:MGA|ParaSite-Compara	Is an ortholog of human EOMES (eomesodermin) and TBR1 (T-box brain transcription factor 1). Is predicted to have DNA-binding transcription activator activity, RNA polymerase II-specific\; RNA polymerase II activating transcription factor binding activity\; and RNA polymerase II regulatory region sequence-specific DNA binding activity. Is involved in pharynx development. Localizes to nucleus. Is e…
WBGene00004024	php-3	Y75B8A.1	HGNC:HOXA10|Panther;OrthoInspector;Inparanoid;EnsEMBL-Compara;ParaSite-Compara, HGNC:HOXA11|OrthoInspector;EnsEMBL-Compara;OrthoFinder;ParaSite-Compara, HGNC:HOXB9|OrthoInspector;EnsEMBL-Compara;Inparanoid;ParaSite-Compara, HGNC:HOXC10|Panther;OrthoInspector;EnsEMBL-Compara;ParaSite-Compara, HGNC:HOXD11|OrthoInspector;EnsEMBL-Compara;OrthoFinder;ParaSite-Compara, HGNC:HOXD9|ParaSite-Compara, HGNC…	Is an ortholog of human HOXA10 (homeobox A10). Is predicted to have DNA binding activity. Is involved in positive regulation of nematode male tail tip morphogenesis. Is expressed in several structures, including coelomocyte\; head neurons\; intestine\; somatic nervous system\; and tail neurons. Human ortholog(s) of this gene are implicated in several diseases, including Guttmacher syndrome\; diab…
WBGene00003779	nob-1	Y75B8A.2	HGNC:HOXD9|OrthoInspector;Inparanoid;PhylomeDB, HGNC:HOXC12|TreeFam;EnsEMBL-Compara;PhylomeDB, HGNC:HOXD12|EnsEMBL-Compara;OrthoInspector;PhylomeDB;Roundup;TreeFam, HGNC:CDX4|ParaSite-Compara, HGNC:CDX1|ParaSite-Compara, HGNC:CDX2|ParaSite-Compara	Is an ortholog of human HOXD12 (homeobox D12). Exhibits sequence-specific DNA binding activity. Is involved in several processes, including embryonic body morphogenesis\; nematode male tail tip morphogenesis\; and positive regulation of nematode male tail tip morphogenesis. Is expressed in head muscle\; intestine\; linker cell\; somatic nervous system\; and tail.
WBGene00013425	ceh-91	Y66A7A.5	N.A.	Is predicted to have DNA binding activity. Is expressed in dorsal nerve cord\; head muscle\; and ventral nerve cord.
WBGene00013543	Y75B8A.6	Y75B8A.6	N.A.	Is predicted to have DNA binding activity and zinc ion binding activity.
WBGene00006389	taf-7.2	Y111B2A.16	HGNC:TAF7L|OrthoInspector;EnsEMBL-Compara;PhylomeDB;Panther;TreeFam;Inparanoid;OrthoFinder;ParaSite-Compara, HGNC:TAF7|EnsEMBL-Compara;OrthoInspector;PhylomeDB;Panther;Roundup;TreeFam;Inparanoid;OrthoFinder;ParaSite-Compara	Is an ortholog of human TAF7 (TATA-box binding protein associated factor 7). Is predicted to have several functions, including histone acetyltransferase binding activity\; transcription coactivator activity\; and transcription factor binding activity.
WBGene00013560	zip-12	Y75B8A.29	N.A.	Is enriched in hypodermis\; intestine\; mechanosensory neurons\; pharyngeal muscle cell\; and somatic gonad precursor based on microarray\; tiling array\; and RNA-seq studies. Is affected by several genes including daf-2\; dpy-10\; and hsf-1 based on microarray and RNA-seq studies. Is affected by twelve chemicals including 1-methylnicotinamide\; levamisole\; and Zidovudine based on RNA-seq and mi…
WBGene00004161	pqn-80	Y111B2A.14	HGNC:MAP3K5|ParaSite-Compara, HGNC:MAP3K15|ParaSite-Compara, HGNC:MAP3K6|ParaSite-Compara	Is enriched in body wall muscle cell based on tiling array studies. Is affected by several genes including sir-2.1\; lin-39\; and dcr-1 based on microarray and RNA-seq studies. Is affected by eight chemicals including Rotenone\; D-glucose\; and metformin based on RNA-seq studies. Is predicted to encode a protein with the following domains: HPC2 and ubinuclein domain and Hpc2-related domain.
WBGene00001092	dro-1	F53A2.5	HGNC:DR1|EnsEMBL-Compara;OrthoInspector;PhylomeDB;Hieranoid;Panther;Roundup;TreeFam;OrthoFinder;Inparanoid;OMA;ParaSite-Compara	Is an ortholog of human DR1 (down-regulator of transcription 1). Is predicted to contribute to transcription coactivator activity.
WBGene00011729	set-16	T12D8.1	HGNC:KMT2C|OrthoInspector;EnsEMBL-Compara;Panther;Roundup;TreeFam;Inparanoid;Hieranoid;OrthoFinder, HGNC:KMT2D|OrthoInspector;EnsEMBL-Compara;Panther;Roundup;TreeFam;Inparanoid;OrthoFinder, HGNC:KMT2B|ParaSite-Compara, HGNC:KMT2A|ParaSite-Compara, HGNC:SETDB2|ParaSite-Compara, ENSG00000285827|ParaSite-Compara, HGNC:SETBP1|ParaSite-Compara, HGNC:NSD1|ParaSite-Compara, HGNC:SETD1A|ParaSite-Compara,…	Is an ortholog of human KMT2C (lysine methyltransferase 2C). Exhibits histone methyltransferase activity (H3-K4 specific). Is involved in histone H3-K4 methylation and regulation of vulval development. Localizes to MLL3\/4 complex. Is expressed in several structures, including P3.p hermaphrodite\; P4.p hermaphrodite\; P5.p hermaphrodite\; P8.p hermaphrodite\; and linker cell. Human ortholog(s) of…
WBGene00022309	rpc-11	Y77E11A.6	HGNC:POLR3K|OrthoInspector;EnsEMBL-Compara;PhylomeDB;Hieranoid;Panther;Roundup;TreeFam;OrthoFinder;Inparanoid;OMA;ParaSite-Compara	Is an ortholog of human POLR3K (RNA polymerase III subunit K). Is predicted to contribute to RNA polymerase III activity.
WBGene00001186	egl-18	F55A8.1	HGNC:GATA5|ParaSite-Compara, HGNC:GATA1|ParaSite-Compara, HGNC:GATA2|ParaSite-Compara, HGNC:GATA6|ParaSite-Compara, HGNC:GATA4|ParaSite-Compara, HGNC:ZGLP1|ParaSite-Compara, HGNC:GATA3|ParaSite-Compara, HGNC:TRPS1|ParaSite-Compara	Is predicted to have DNA-binding transcription factor activity, RNA polymerase II-specific and RNA polymerase II cis-regulatory region sequence-specific DNA binding activity. Is involved in several processes, including cell fate specification\; nematode larval development\; and positive regulation of nematode male tail tip morphogenesis. Localizes to nucleus. Is expressed in several structures, i…
WBGene00001253	elt-6	F52C12.5	HGNC:GATA1|ParaSite-Compara, HGNC:ZGLP1|ParaSite-Compara, HGNC:GATA3|ParaSite-Compara, HGNC:TRPS1|ParaSite-Compara	Exhibits RNA polymerase II regulatory region sequence-specific DNA binding activity. Localizes to nucleus. Is expressed in several structures, including ABplaapppa\; ABplaapppp\; ABprpppppaa\; P9\/10L\; and body wall muscle cell from MS lineage. Human ortholog(s) of this gene are implicated in several diseases, including Down syndrome\; hypoparathyroidism-deafness-renal disease syndrome\; and tri…
WBGene00002990	lin-1	C37F5.1	HGNC:ELK1|OrthoInspector;Hieranoid;Panther;TreeFam;OrthoFinder;Inparanoid;EnsEMBL-Compara;ParaSite-Compara, HGNC:ELK4|OrthoInspector;Hieranoid;Panther;TreeFam;Inparanoid;EnsEMBL-Compara;ParaSite-Compara, HGNC:ELK3|OrthoInspector;Hieranoid;Panther;TreeFam;Inparanoid;EnsEMBL-Compara;ParaSite-Compara, ENSG00000142539|ParaSite-Compara, HGNC:ETV3|ParaSite-Compara, ENSG00000268041|ParaSite-Compara, HGN…	Is an ortholog of human ELK1 (ETS transcription factor ELK1). Exhibits sequence-specific DNA binding activity. Contributes to RNA polymerase II regulatory region sequence-specific DNA binding activity. Is involved in several processes, including negative regulation of transcription by RNA polymerase II\; oviposition\; and vulval development. Localizes to RNA polymerase II transcription repressor …
WBGene00021082	zip-11	W08E12.1	HGNC:BATF3|Panther;OrthoFinder	Is predicted to have DNA-binding transcription factor activity, RNA polymerase II-specific and RNA polymerase II cis-regulatory region sequence-specific DNA binding activity.
WBGene00015651	ceh-53	C09G12.1	HGNC:RHOXF2|Panther;EnsEMBL-Compara;ParaSite-Compara, HGNC:ESX1|Panther;EnsEMBL-Compara;ParaSite-Compara, HGNC:RHOXF1|Panther;EnsEMBL-Compara;ParaSite-Compara, HGNC:RHOXF2B|EnsEMBL-Compara;Panther;ParaSite-Compara, HGNC:ALX4|Panther;EnsEMBL-Compara;ParaSite-Compara, HGNC:PROP1|ParaSite-Compara, HGNC:GSC2|ParaSite-Compara, HGNC:PRRX2|ParaSite-Compara, HGNC:OTX1|ParaSite-Compara, HGNC:SEBOX|ParaSit…	Is an ortholog of several human genes including ALX4 (ALX homeobox 4)\; RHOXF1 (Rhox homeobox family member 1)\; and RHOXF2B (Rhox homeobox family member 2B). Is predicted to have DNA-binding transcription factor activity, RNA polymerase II-specific and RNA polymerase II regulatory region sequence-specific DNA binding activity. Human ortholog(s) of this gene are implicated in several diseases, in…
WBGene00006970	zag-1	F28F9.1	HGNC:ZEB2|EnsEMBL-Compara;OrthoInspector;PhylomeDB;Hieranoid;Panther;Roundup;TreeFam;Inparanoid;OrthoFinder, HGNC:ZEB1|OrthoInspector;EnsEMBL-Compara;PhylomeDB;Hieranoid;Panther;Roundup;TreeFam;Inparanoid;OrthoFinder, HGNC:HINFP|ParaSite-Compara	Is an ortholog of human ZEB1 (zinc finger E-box binding homeobox 1) and ZEB2 (zinc finger E-box binding homeobox 2). Is predicted to have DNA binding activity and metal ion binding activity. Is involved in axon guidance and positive regulation of axon extension. Localizes to nucleus. Is expressed in body wall musculature\; enteric muscle\; neurons\; pharynx\; and somatic nervous system.
WBGene00022608	madf-9	ZC416.1	N.A.	Is enriched in AVE and intestine based on tiling array and RNA-seq studies. Is affected by several genes including daf-16\; lin-39\; and lin-35 based on microarray\; tiling array\; and RNA-seq studies. Is affected by eleven chemicals including Rotenone\; stavudine\; and Zidovudine based on RNA-seq and microarray studies. Is predicted to encode a protein with the following domains: Alcohol dehydro…
WBGene00020930	hlh-30	W02C12.3	HGNC:TFEC|EnsEMBL-Compara;Panther;Inparanoid;PhylomeDB;OrthoInspector;OrthoFinder;ParaSite-Compara, HGNC:TFEB|EnsEMBL-Compara;PhylomeDB;Panther;Roundup;Inparanoid;OrthoInspector;OrthoFinder;ParaSite-Compara, HGNC:TFE3|EnsEMBL-Compara;Panther;Inparanoid;OrthoInspector;OrthoFinder;ParaSite-Compara, HGNC:MITF|OrthoInspector;EnsEMBL-Compara;PhylomeDB;Panther;Roundup;Inparanoid;OrthoFinder;ParaSite-Co…	Is an ortholog of human MITF (melanocyte inducing transcription factor) and TFEB (transcription factor EB). Is predicted to have DNA-binding transcription factor activity, RNA polymerase II-specific. Is involved in several processes, including defense response to bacterium\; determination of adult lifespan\; and regulation of defense response to bacterium, incompatible interaction. Localizes to c…
WBGene00003938	pax-2	K06B9.5	HGNC:PAX8|TreeFam;Panther;OrthoFinder;ParaSite-Compara, HGNC:PAX2|Roundup;TreeFam;Panther;OrthoFinder, HGNC:RHOXF1|ParaSite-Compara, HGNC:PROP1|ParaSite-Compara, HGNC:ALX4|ParaSite-Compara, HGNC:GSC2|ParaSite-Compara, HGNC:PRRX2|ParaSite-Compara, HGNC:OTX1|ParaSite-Compara, HGNC:SEBOX|ParaSite-Compara, HGNC:ALX3|ParaSite-Compara, HGNC:PAX6|ParaSite-Compara, HGNC:HESX1|ParaSite-Compara, HGNC:RAX|P…	Is an ortholog of human PAX2 (paired box 2) and PAX8 (paired box 8). Is predicted to have DNA binding activity. Is expressed in vulD. Human ortholog(s) of this gene are implicated in several diseases, including WAGR syndrome\; diabetes mellitus (multiple)\; and eye disease (multiple).
WBGene00022679	ZK180.5	ZK180.5	N.A.	Is enriched in DA neuron\; hypodermis\; intestine\; pharyngeal muscle cell\; and somatic gonad precursor based on tiling array\; RNA-seq\; and microarray studies. Is affected by several genes including daf-16\; daf-2\; and age-1 based on microarray\; quantitative PCR\; tiling array\; proteomic\; and RNA-seq studies. Is affected by twenty-six chemicals including hydrogen sulfide\; 1-methylnicotina…
WBGene00017920	jmjd-1.2	F29B9.2	HGNC:KDM7A|OrthoInspector;EnsEMBL-Compara;PhylomeDB;Hieranoid;Panther;TreeFam;OrthoFinder;ParaSite-Compara, HGNC:PHF2|EnsEMBL-Compara;PhylomeDB;Hieranoid;Panther;TreeFam;OrthoFinder;ParaSite-Compara, HGNC:PHF8|ParaSite-Compara, HGNC:KDM2A|ParaSite-Compara, HGNC:KDM2B|ParaSite-Compara	Is an ortholog of human KDM7A (lysine demethylase 7A). Exhibits histone binding activity\; histone demethylase activity (H3-K27 specific)\; and histone demethylase activity (H3-K9 specific). Is involved in histone H3-K27 demethylation\; histone H3-K9 demethylation\; and mitochondrial unfolded protein response. Localizes to nucleus. Is expressed in several structures, including germ cell\; hypoder…
WBGene00004205	psr-1	F29B9.4	HGNC:JMJD6|EnsEMBL-Compara;OrthoInspector;PhylomeDB;Hieranoid;Panther;Roundup;OrthoFinder;Inparanoid;OMA;ParaSite-Compara	Is an ortholog of human JMJD6 (jumonji domain containing 6, arginine demethylase and lysine hydroxylase). Exhibits identical protein binding activity and phosphatidylserine binding activity. Is involved in engulfment of apoptotic cell. Localizes to spanning component of plasma membrane. Is expressed in engulfing cell.
WBGene00003976	pes-1	T28H11.4	HGNC:FOXL2|ParaSite-Compara	Is predicted to have DNA-binding transcription factor activity, RNA polymerase II-specific. Is involved in embryo development and nematode larval development. Is expressed in several structures, including ABplaaaap\; ABplaaapa\; body wall muscle cell from D lineage\; neurons\; and somatic gonad precursor. Human ortholog(s) of this gene are implicated in blepharophimosis, ptosis, and epicanthus in…
WBGene00001439	fkh-7	F26D12.1	HGNC:FOXP1|OrthoInspector;EnsEMBL-Compara;PhylomeDB;Hieranoid;Panther;Roundup;TreeFam;OrthoFinder, HGNC:FOXP3|OrthoInspector;Panther;PhylomeDB, HGNC:FOXP2|EnsEMBL-Compara;OrthoInspector;PhylomeDB;Hieranoid;Panther;TreeFam;OrthoFinder;ParaSite-Compara, HGNC:FOXP4|EnsEMBL-Compara;OrthoInspector;PhylomeDB;Hieranoid;Panther;Roundup;TreeFam;OrthoFinder	Is an ortholog of human FOXP1 (forkhead box P1)\; FOXP2 (forkhead box P2)\; and FOXP4 (forkhead box P4). Is predicted to have DNA-binding transcription factor activity and sequence-specific DNA binding activity. Is expressed in several structures, including intestine\; neurons\; pharynx\; reproductive system\; and ventral nerve cord. Human ortholog(s) of this gene are implicated in speech-languag…
WBGene00004804	skn-1	T19E7.2	HGNC:NFE2L3|OrthoInspector;Hieranoid;Panther;Inparanoid;OrthoFinder, HGNC:NFE2L2|OrthoInspector;Hieranoid;Panther;Inparanoid;OrthoFinder, HGNC:NFE2|Panther;OrthoInspector;Inparanoid;OrthoFinder, HGNC:NFE2L1|OrthoInspector;Hieranoid;Panther;Inparanoid;OrthoFinder	Is an ortholog of human NFE2L1 (nuclear factor, erythroid 2 like 1)\; NFE2L2 (nuclear factor, erythroid 2 like 2)\; and NFE2L3 (nuclear factor, erythroid 2 like 3). Exhibits Hsp70 protein binding activity and RNA polymerase II regulatory region sequence-specific DNA binding activity. Is involved in several processes, including endoplasmic reticulum unfolded protein response\; positive regulation …
WBGene00015934	ceh-48	C17H12.9	HGNC:ONECUT2|OrthoInspector;EnsEMBL-Compara;PhylomeDB;Hieranoid;Panther;Roundup;Inparanoid;OrthoFinder;ParaSite-Compara, HGNC:ONECUT1|OrthoInspector;EnsEMBL-Compara;PhylomeDB;Hieranoid;Panther;Roundup;Inparanoid;OrthoFinder;ParaSite-Compara, ENSG00000205922|ParaSite-Compara	Is an ortholog of human ONECUT1 (one cut homeobox 1) and ONECUT2 (one cut homeobox 2). Is predicted to have DNA binding activity. Is expressed in head\; spermathecal-uterine junction\; ventral nerve cord\; and vulva.
WBGene00018468	cla-1	F45E4.3	HGNC:PCLO|EnsEMBL-Compara;Roundup, HGNC:BSN|ParaSite-Compara	Is predicted to have several functions, including SNARE binding activity\; calcium ion binding activity\; and phospholipid binding activity. Is involved in maintenance of presynaptic active zone structure\; spontaneous synaptic transmission\; and synaptic vesicle cycle. Localizes to presynaptic active zone. Is expressed in nervous system.
WBGene00003827	ntl-4	C49H3.5	HGNC:CNOT4|EnsEMBL-Compara;OrthoInspector;PhylomeDB;Panther;Roundup;Inparanoid;OrthoFinder	Is an ortholog of human CNOT4 (CCR4-NOT transcription complex subunit 4). Is predicted to have ubiquitin-protein transferase activity.
WBGene00012121	T28C6.7	T28C6.7	N.A.	Is expressed in tail. Is predicted to encode a protein with the following domain: .
WBGene00007496	npax-4	C09G9.7	N.A.	Is predicted to have DNA binding activity. Is expressed in body wall musculature and pseudocoelom.
WBGene00001249	elt-1	W09C2.1	HGNC:GATA1|EnsEMBL-Compara;PhylomeDB;Panther;Roundup;TreeFam;Inparanoid;OrthoFinder;ParaSite-Compara, HGNC:GATA2|EnsEMBL-Compara;TreeFam;OrthoInspector;Roundup;OrthoFinder;ParaSite-Compara, HGNC:GATA3|EnsEMBL-Compara;TreeFam;OrthoInspector;Roundup;OrthoFinder;ParaSite-Compara, HGNC:GATA4|Panther;OrthoInspector;Roundup;PhylomeDB;OrthoFinder;ParaSite-Compara, HGNC:GATA6|OrthoInspector;Panther;Round…	Is an ortholog of human GATA1 (GATA binding protein 1). Exhibits DNA-binding transcription factor activity, RNA polymerase II-specific and RNA polymerase II intronic transcription regulatory region sequence-specific DNA binding activity. Is involved in several processes, including epidermal cell fate specification\; regulation of transcription by RNA polymerase II\; and spermatid development. Loc…
WBGene00001204	egl-38	C04G2.7	HGNC:PAX5|TreeFam;Panther;Roundup;OrthoFinder;ParaSite-Compara, HGNC:PAX2|TreeFam;Panther;OrthoFinder, HGNC:PAX8|TreeFam;Panther;OrthoFinder;ParaSite-Compara, HGNC:RHOXF1|ParaSite-Compara, HGNC:PROP1|ParaSite-Compara, HGNC:ALX4|ParaSite-Compara, HGNC:GSC2|ParaSite-Compara, HGNC:PRRX2|ParaSite-Compara, HGNC:OTX1|ParaSite-Compara, HGNC:SEBOX|ParaSite-Compara, HGNC:ALX3|ParaSite-Compara, HGNC:PAX6|P…	Is an ortholog of human PAX5 (paired box 5). Exhibits RNA polymerase II regulatory region sequence-specific DNA binding activity. Is involved in several processes, including nematode male tail tip morphogenesis\; uterus development\; and vulval development. Localizes to nucleus. Is expressed in body wall musculature\; egg-laying apparatus\; head neurons\; and ventral nerve cord. Human ortholog(s)…
WBGene00003167	mec-3	F01D4.6	HGNC:LHX5|TreeFam;Panther;PhylomeDB, HGNC:LHX1|TreeFam;Panther;PhylomeDB	Is an ortholog of human LHX1 (LIM homeobox 1) and LHX5 (LIM homeobox 5). Exhibits DNA-binding transcription factor activity, RNA polymerase II-specific\; RNA polymerase II regulatory region sequence-specific DNA binding activity\; and transcription factor binding activity. Is involved in several processes, including mechanosensory behavior\; negative regulation of RNA polymerase II regulatory reg…
WBGene00011293	R102.6	R102.6	N.A.	Is enriched in dopaminergic neurons\; germline precursor cell\; and hypodermis based on tiling array studies. Is affected by several genes including daf-2\; daf-12\; and eat-2 based on microarray\; tiling array\; and RNA-seq studies. Is affected by eight chemicals including levamisole\; Psoralens\; and allantoin based on microarray and RNA-seq studies.
WBGene00008488	F01D4.5	F01D4.5	N.A.	Is predicted to have metal ion binding activity. Is expressed in hypodermis\; male gonad\; nervous system\; and vulva.
WBGene00011259	miz-1	R13.4	HGNC:ZMIZ2|Inparanoid;Panther;Roundup;PhylomeDB;EnsEMBL-Compara;OrthoFinder;ParaSite-Compara, HGNC:ZMIZ1|Roundup;Panther;Inparanoid;OrthoFinder;EnsEMBL-Compara;ParaSite-Compara	Is an ortholog of human ZMIZ2 (zinc finger MIZ-type containing 2). Is predicted to have RNA polymerase II transcription factor binding activity\; SUMO ligase activity\; and transcription coregulator activity. Is expressed in several structures, including anal depressor muscle\; egg-laying apparatus\; nervous system\; pharyngeal-intestinal valve\; and pharynx.
WBGene00011257	npax-3	R13.2	N.A.	Is predicted to have DNA binding activity. Is expressed in dorsal nerve cord\; head neurons\; intestine\; and tail neurons.
WBGene00004319	rbr-2	ZK593.4	HGNC:KDM5A|OrthoInspector;EnsEMBL-Compara;PhylomeDB;Hieranoid;Panther;Roundup;TreeFam;Inparanoid;OrthoFinder;OMA, HGNC:KDM5B|EnsEMBL-Compara;OrthoInspector;PhylomeDB;Hieranoid;Panther;Roundup;TreeFam;Inparanoid;OrthoFinder;OMA;ParaSite-Compara, HGNC:KDM5C|OrthoInspector;EnsEMBL-Compara;PhylomeDB;Hieranoid;Panther;Roundup;TreeFam;OrthoFinder;Inparanoid;OMA;ParaSite-Compara, HGNC:KDM5D|EnsEMBL-Comp…	Is an ortholog of human KDM5B (lysine demethylase 5B) and KDM5C (lysine demethylase 5C). Exhibits histone demethylase activity (H3-dimethyl-K4 specific) and histone demethylase activity (H3-trimethyl-K4 specific). Is involved in determination of adult lifespan\; histone H3-K4 demethylation\; and regulation of vulval development. Localizes to nucleus. Is expressed in several structures, including …
WBGene00011130	zip-6	R07H5.10	HGNC:HLF|ParaSite-Compara, HGNC:TEF|ParaSite-Compara, HGNC:DBP|ParaSite-Compara	Is predicted to have RNA polymerase II regulatory region sequence-specific DNA binding activity.
WBGene00003148	mbf-1	H21P03.1	HGNC:EDF1|EnsEMBL-Compara;OrthoInspector;PhylomeDB;Hieranoid;Panther;Roundup;TreeFam;Inparanoid;OrthoFinder;OMA;ParaSite-Compara	Is an ortholog of human EDF1 (endothelial differentiation related factor 1). Is predicted to have DNA binding activity. Is expressed in tail.
WBGene00001585	gfl-1	M04B2.3	HGNC:YEATS4|EnsEMBL-Compara;OrthoInspector;PhylomeDB;Hieranoid;Panther;Inparanoid;OrthoFinder;OMA, HGNC:MLLT3|ParaSite-Compara, HGNC:MLLT1|ParaSite-Compara	Is an ortholog of human YEATS4 (YEATS domain containing 4). Is predicted to have chromatin binding activity. Is involved in RNA interference.
WBGene00006555	tbx-36	ZK829.5	N.A.	Is predicted to have DNA-binding transcription activator activity, RNA polymerase II-specific\; RNA polymerase II activating transcription factor binding activity\; and RNA polymerase II regulatory region sequence-specific DNA binding activity.
WBGene00013383	aptf-2	Y62E10A.17	HGNC:TFAP2B|Hieranoid;Panther;Inparanoid;PhylomeDB;ParaSite-Compara, HGNC:TFAP2D|PhylomeDB;Hieranoid;Panther;TreeFam;Inparanoid;EnsEMBL-Compara;ParaSite-Compara, HGNC:TFAP2A|ParaSite-Compara, HGNC:TFAP2E|ParaSite-Compara, HGNC:TFAP2C|ParaSite-Compara	Is an ortholog of human Tfap2d. Is predicted to have DNA-binding transcription factor activity, RNA polymerase II-specific and RNA polymerase II regulatory region sequence-specific DNA binding activity. Localizes to cytoplasm and nucleus. Is expressed in AB lineage cell and C lineage cell. Human ortholog(s) of this gene are implicated in Char syndrome and branchiooculofacial syndrome.
WBGene00007058	dmd-6	F13G11.1	HGNC:DMRT3|ParaSite-Compara, HGNC:DMRTA2|ParaSite-Compara, HGNC:DMRTB1|ParaSite-Compara, HGNC:DMRT2|ParaSite-Compara, HGNC:DMRT1|ParaSite-Compara, HGNC:DMRTC1B|ParaSite-Compara, HGNC:DMRTC2|ParaSite-Compara, HGNC:DMRTC1|ParaSite-Compara	Is predicted to have DNA-binding transcription factor activity\; metal ion binding activity\; and sequence-specific DNA binding activity. Is expressed in several structures, including neurons\; pharynx\; rectum\; tail\; and vulva.
WBGene00006558	tbx-39	Y73F8A.16	HGNC:EOMES|TreeFam;Panther;PhylomeDB, HGNC:TBX21|TreeFam;Panther;PhylomeDB, HGNC:TBR1|TreeFam;Panther;PhylomeDB	Is an ortholog of human EOMES (eomesodermin)\; TBR1 (T-box brain transcription factor 1)\; and TBX21 (T-box transcription factor 21). Is predicted to have DNA-binding transcription activator activity, RNA polymerase II-specific\; RNA polymerase II activating transcription factor binding activity\; and RNA polymerase II regulatory region sequence-specific DNA binding activity. Is expressed in head…
WBGene00009540	hlh-31	F38C2.8	HGNC:BHLHE22|EnsEMBL-Compara;OrthoInspector;PhylomeDB;Panther;TreeFam;OrthoFinder;ParaSite-Compara, HGNC:BHLHE23|EnsEMBL-Compara;OrthoInspector;PhylomeDB;Panther;TreeFam;OrthoFinder;ParaSite-Compara, HGNC:NEUROD6|ParaSite-Compara, ENSG00000123307|ParaSite-Compara, HGNC:NEUROG2|ParaSite-Compara, HGNC:NEUROG3|ParaSite-Compara, HGNC:OLIG3|ParaSite-Compara, HGNC:ATOH1|ParaSite-Compara, HGNC:ATOH7|Par…	Is an ortholog of human BHLHE22 (basic helix-loop-helix family member e22) and BHLHE23 (basic helix-loop-helix family member e23). Is predicted to have protein dimerization activity. Human ortholog(s) of this gene are implicated in congenital malabsorptive diarrhea 4 and persistent hyperplastic primary vitreous.
WBGene00013100	zip-7	Y51H4A.4	N.A.	Is predicted to have RNA polymerase II regulatory region sequence-specific DNA binding activity.
WBGene00013418	Y65A5A.1	Y65A5A.1	N.A.	Is enriched in body wall musculature\; hypodermis\; intestine\; and pharyngeal muscle cell based on tiling array and microarray studies. Is affected by several genes including daf-16\; daf-2\; and skn-1 based on microarray and RNA-seq studies. Is affected by seventeen chemicals including 1-methylnicotinamide\; methylmercuric chloride\; and Rotenone based on RNA-seq and microarray studies.
WBGene00012420	Y7A9D.1	Y7A9D.1	N.A.	Is enriched in germ line\; head mesodermal cell\; hypodermis\; muscle cell\; and neurons based on RNA-seq and microarray studies. Is affected by several genes including daf-2\; age-1\; and eat-2 based on microarray\; tiling array\; and RNA-seq studies. Is affected by sixteen chemicals including 1-methylnicotinamide\; methylmercuric chloride\; and D-glucose based on RNA-seq and microarray studies.
WBGene00008195	ceh-88	C49C3.5	N.A.	Is predicted to have DNA-binding transcription factor activity, RNA polymerase II-specific and transcription regulatory region sequence-specific DNA binding activity. Is expressed in several structures, including coelomocyte\; excretory cell\; hyp12\; tail hypodermis\; and ventral nerve cord.
WBGene00006549	tbx-30	Y59E9AR.3	N.A.	Is predicted to have DNA-binding transcription factor activity.
WBGene00022060	dmd-9	Y67D8A.3	HGNC:DMRT3|ParaSite-Compara, HGNC:DMRTB1|ParaSite-Compara, HGNC:DMRT2|ParaSite-Compara, HGNC:DMRTC2|ParaSite-Compara, HGNC:DMRTC1|ParaSite-Compara, HGNC:DMRT1|ParaSite-Compara, HGNC:DMRTC1B|ParaSite-Compara	Is predicted to have DNA-binding transcription factor activity\; metal ion binding activity\; and sequence-specific DNA binding activity. Is expressed in several structures, including body wall musculature\; coelomocyte\; intestine\; neurons\; and somatic nervous system.
WBGene00003595	ngn-1	Y69A2AR.29	HGNC:NEUROG2|Hieranoid;Panther;OrthoFinder;PhylomeDB;EnsEMBL-Compara;ParaSite-Compara, HGNC:NEUROG3|OrthoInspector;PhylomeDB;Panther;Roundup;OrthoFinder;EnsEMBL-Compara;ParaSite-Compara, HGNC:NEUROG1|PhylomeDB;Hieranoid;Panther;Roundup;OrthoFinder;EnsEMBL-Compara;ParaSite-Compara, HGNC:NEUROD6|ParaSite-Compara, HGNC:NEUROD2|ParaSite-Compara, HGNC:NEUROD1|ParaSite-Compara, HGNC:BHLHE23|ParaSite-Co…	Is an ortholog of human NEUROG1 (neurogenin 1) and NEUROG3 (neurogenin 3). Is predicted to have protein dimerization activity. Is expressed in ABaraappaa. Human ortholog(s) of this gene are implicated in congenital malabsorptive diarrhea 4\; diabetes mellitus (multiple)\; and persistent hyperplastic primary vitreous.
WBGene00020961	sknr-1	W02H5.7	HGNC:NFE2L1|Roundup;Inparanoid;OrthoInspector;Hieranoid;OrthoFinder, HGNC:NFE2|Inparanoid;Roundup;OrthoInspector;OrthoFinder, HGNC:NFE2L2|Roundup;Inparanoid;OrthoInspector;Hieranoid;OrthoFinder	Is an ortholog of human NFE2L1 (nuclear factor, erythroid 2 like 1) and NFE2L2 (nuclear factor, erythroid 2 like 2). Is predicted to have DNA binding activity.
WBGene00016233	nhr-290	C29G2.5	N.A.	Is predicted to have DNA-binding transcription factor activity\; sequence-specific DNA binding activity\; and zinc ion binding activity.
WBGene00003025	lin-40	T27C4.4	HGNC:MTA3|OrthoInspector;EnsEMBL-Compara;PhylomeDB;Hieranoid;Panther;Roundup;TreeFam;Inparanoid;OrthoFinder;ParaSite-Compara, HGNC:MTA2|EnsEMBL-Compara;OrthoInspector;PhylomeDB;Hieranoid;Panther;Roundup;TreeFam;Inparanoid;OrthoFinder;ParaSite-Compara, HGNC:MTA1|EnsEMBL-Compara;OrthoInspector;PhylomeDB;Hieranoid;Panther;TreeFam;Inparanoid;OrthoFinder;ParaSite-Compara	Is an ortholog of human MTA2 (metastasis associated 1 family member 2) and MTA3 (metastasis associated 1 family member 3). Is predicted to have RNA polymerase II repressing transcription factor binding activity\; histone deacetylase binding activity\; and transcription coregulator activity. Is expressed in distal tip cell and somatic cell.
WBGene00005932	srx-41	F59B1.7	N.A.	Is expressed in dorsal nerve cord\; head muscle\; head neurons\; and tail neurons. Is predicted to encode a protein with the following domains: Serpentine type 7TM GPCR chemoreceptor Srx and 7TM GPCR, serpentine receptor class x (Srx).
WBGene00017035	D1065.3	D1065.3	N.A.	Is enriched in muscle cell and in male based on RNA-seq and microarray studies. Is affected by several genes including daf-2\; eat-2\; and sir-2.1 based on microarray and RNA-seq studies. Is affected by twelve chemicals including hydrogen sulfide\; methylmercuric chloride\; and Tunicamycin based on microarray and RNA-seq studies.
WBGene00006796	unc-62	T28F12.2	HGNC:MEIS3|EnsEMBL-Compara;OrthoInspector;PhylomeDB;Panther;Inparanoid;OrthoFinder;Hieranoid, HGNC:MEIS1|OrthoInspector;EnsEMBL-Compara;PhylomeDB;Roundup;Inparanoid;OrthoFinder;Hieranoid;Panther;ParaSite-Compara, HGNC:MEIS2|EnsEMBL-Compara;OrthoInspector;PhylomeDB;Panther;Roundup;Inparanoid;OrthoFinder;Hieranoid, HGNC:PKNOX2|Roundup;OrthoInspector;EnsEMBL-Compara;OrthoFinder;ParaSite-Compara, HGN…	Is an ortholog of human MEIS1 (Meis homeobox 1). Is predicted to have DNA binding activity. Is involved in mesodermal cell fate specification\; muscle cell differentiation\; and positive regulation of translation. Localizes to nucleus. Is expressed in several structures, including body wall musculature\; neurons\; reproductive system\; ventral nerve cord\; and vulval precursor cell. Is used to st…
WBGene00000455	ceh-34	C10G8.6	HGNC:SIX2|OMA;TreeFam;Panther;Hieranoid, HGNC:SIX1|OMA;TreeFam;Panther, HGNC:SIX5|TreeFam;EnsEMBL-Compara;Roundup;ParaSite-Compara, HGNC:SIX4|ParaSite-Compara	Is an ortholog of human SIX2 (SIX homeobox 2) and SIX5 (SIX homeobox 5). Exhibits sequence-specific DNA binding activity. Is involved in mesodermal cell fate specification\; positive regulation of apoptotic process involved in development\; and regulation of transcription, DNA-templated. Localizes to nucleus. Is expressed in body wall musculature\; corpus\; head\; male sex myoblast\; and pharynge…
WBGene00001345	fos-1	F29G9.4	HGNC:FOSL1|Roundup;Panther;OrthoFinder, HGNC:FOSL2|Roundup;Panther;OrthoFinder, HGNC:FOS|Panther;Roundup;OrthoFinder, HGNC:ATF7|Roundup;PhylomeDB, HGNC:ATF2|OrthoInspector;Roundup	Is an ortholog of human FOS (Fos proto-oncogene, AP-1 transcription factor subunit)\; FOSL1 (FOS like 1, AP-1 transcription factor subunit)\; and FOSL2 (FOS like 2, AP-1 transcription factor subunit). Exhibits several functions, including enzyme binding activity\; identical protein binding activity\; and transcription factor binding activity. Is involved in several processes, including basement m…
WBGene00017538	ceh-49	F17A9.6	HGNC:ONECUT1|ParaSite-Compara, HGNC:ONECUT2|ParaSite-Compara, ENSG00000205922|ParaSite-Compara	Is predicted to have DNA binding activity. Is expressed in coelomocyte\; head muscle\; head neurons\; intestine\; and somatic nervous system.
WBGene00017598	F19F10.1	F19F10.1	HGNC:FEV|ParaSite-Compara, HGNC:ETV5|ParaSite-Compara, HGNC:ERG|ParaSite-Compara, HGNC:ETV3L|ParaSite-Compara, HGNC:ERF|ParaSite-Compara, HGNC:ETV2|ParaSite-Compara, HGNC:SPI1|ParaSite-Compara, HGNC:ELF2|ParaSite-Compara, ENSG00000142539|ParaSite-Compara, HGNC:ETV3|ParaSite-Compara, ENSG00000268041|ParaSite-Compara, HGNC:ELK4|ParaSite-Compara, HGNC:SPIC|ParaSite-Compara, HGNC:ELF3|ParaSite-Compar…	Is predicted to have DNA-binding transcription factor activity, RNA polymerase II-specific. Human ortholog(s) of this gene are implicated in acute myeloid leukemia and craniosynostosis.
WBGene00017601	ets-7	F19F10.5	HGNC:ETV6|EnsEMBL-Compara;OrthoFinder;ParaSite-Compara, HGNC:FEV|ParaSite-Compara, HGNC:ETV5|ParaSite-Compara, HGNC:ERG|ParaSite-Compara, HGNC:ETV3L|ParaSite-Compara, HGNC:ERF|ParaSite-Compara, HGNC:ETV2|ParaSite-Compara, HGNC:SPI1|ParaSite-Compara, HGNC:ELF2|ParaSite-Compara, ENSG00000142539|ParaSite-Compara, HGNC:ETV3|ParaSite-Compara, ENSG00000268041|ParaSite-Compara, HGNC:ELK4|ParaSite-Compar…	Is an ortholog of human ETV6 (ETS variant transcription factor 6). Is predicted to have DNA-binding transcription factor activity, RNA polymerase II-specific. Human ortholog(s) of this gene are implicated in acute myeloid leukemia and craniosynostosis.
WBGene00003937	pax-1	K07C11.1	HGNC:PAX1|Roundup;Panther;OrthoFinder;PhylomeDB;OrthoInspector, HGNC:PAX9|OrthoInspector;PhylomeDB;Panther;Roundup;OrthoFinder;EnsEMBL-Compara, HGNC:RHOXF1|ParaSite-Compara, HGNC:PROP1|ParaSite-Compara, HGNC:ALX4|ParaSite-Compara, HGNC:GSC2|ParaSite-Compara, HGNC:PRRX2|ParaSite-Compara, HGNC:OTX1|ParaSite-Compara, HGNC:SEBOX|ParaSite-Compara, HGNC:ALX3|ParaSite-Compara, HGNC:PAX6|ParaSite-Compara…	Is an ortholog of human PAX9 (paired box 9). Is predicted to have DNA binding activity. Is expressed in epithelial cell and pharyngeal cell. Human ortholog(s) of this gene are implicated in several diseases, including WAGR syndrome\; diabetes mellitus (multiple)\; and eye disease (multiple).
WBGene00001954	hlh-10	ZK682.4	HGNC:TCF21|Roundup;Panther;Inparanoid;OrthoFinder;Hieranoid, HGNC:MSC|Roundup;Inparanoid;Panther;OrthoFinder;Hieranoid, HGNC:TCF24|Hieranoid;Inparanoid;PhylomeDB	Is an ortholog of human MSC (musculin) and TCF21 (transcription factor 21). Is predicted to have protein dimerization activity. Is expressed in ADLL\; ADLR\; ASEL\; ASER\; and neurons.
WBGene00006778	unc-42	F58E6.10	HGNC:PROP1|EnsEMBL-Compara;Roundup;OrthoFinder;ParaSite-Compara, HGNC:RHOXF1|ParaSite-Compara, HGNC:ALX4|ParaSite-Compara, HGNC:PRRX2|ParaSite-Compara, HGNC:OTX1|ParaSite-Compara, HGNC:SEBOX|ParaSite-Compara, HGNC:PAX6|ParaSite-Compara, HGNC:HESX1|ParaSite-Compara, HGNC:PAX8|ParaSite-Compara, HGNC:RAX|ParaSite-Compara, HGNC:PAX4|ParaSite-Compara, HGNC:RHOXF2B|ParaSite-Compara, HGNC:PITX3|ParaSite…	Is an ortholog of human PROP1 (PROP paired-like homeobox 1). Is predicted to have DNA-binding transcription factor activity, RNA polymerase II-specific and RNA polymerase II regulatory region sequence-specific DNA binding activity. Is involved in neuron fate specification and positive regulation of transcription by RNA polymerase II. Is expressed in hypodermis\; nerve ring\; and neurons. Human or…
WBGene00000445	ceh-22	F29F11.5	HGNC:NKX2-2|EnsEMBL-Compara;TreeFam;Panther;Roundup;Hieranoid;OrthoFinder;ParaSite-Compara, HGNC:NKX2-8|EnsEMBL-Compara;TreeFam;Panther;OrthoFinder, HGNC:NKX2-6|ParaSite-Compara, HGNC:NKX3-2|ParaSite-Compara, HGNC:NKX3-1|ParaSite-Compara	Is an ortholog of human NKX2-2 (NK2 homeobox 2). Exhibits sequence-specific DNA binding activity. Is involved in cell fate specification\; pharyngeal muscle development\; and positive regulation of transcription by RNA polymerase II. Localizes to nucleus. Is expressed in several structures, including G1\; gonad\; neurons\; pharyngeal cell\; and ventral nerve cord. Human ortholog(s) of this gene a…
WBGene00003509	mxl-1	T19B10.11	HGNC:MAX|EnsEMBL-Compara;PhylomeDB;Hieranoid;Panther;Roundup;Inparanoid;OMA;ParaSite-Compara	Is an ortholog of human MAX (MYC associated factor X). Exhibits protein domain specific binding activity and protein heterodimerization activity. Contributes to sequence-specific DNA binding activity. Is involved in determination of adult lifespan. Localizes to nucleus and transcription factor complex. Is expressed in tail neurons. Human ortholog(s) of this gene are implicated in pheochromocytoma.
WBGene00007387	jmjd-5	C06H2.3	HGNC:KDM8|EnsEMBL-Compara;OrthoInspector;PhylomeDB;Hieranoid;Panther;Roundup;Inparanoid;OrthoFinder;ParaSite-Compara	Is an ortholog of human KDM8 (lysine demethylase 8). Is predicted to have histone demethylase activity (H3-K36 specific).
WBGene00000449	ceh-27	F46F3.1	HGNC:NKX1-2|ParaSite-Compara, HGNC:NKX6-3|ParaSite-Compara, HGNC:NKX2-6|ParaSite-Compara, HGNC:NKX6-2|ParaSite-Compara, HGNC:NKX2-8|ParaSite-Compara, HGNC:NKX6-1|ParaSite-Compara, HGNC:NKX3-2|ParaSite-Compara, HGNC:NKX2-5|ParaSite-Compara, HGNC:NKX2-4|ParaSite-Compara, HGNC:NKX1-1|ParaSite-Compara, HGNC:NKX3-1|ParaSite-Compara, HGNC:NKX2-2|ParaSite-Compara, HGNC:NKX2-1|ParaSite-Compara	Is predicted to have DNA-binding transcription factor activity, RNA polymerase II-specific and RNA polymerase II cis-regulatory region sequence-specific DNA binding activity. Is expressed in intestine and nerve ring. Human ortholog(s) of this gene are implicated in several diseases, including congenital heart disease (multiple)\; congenital nongoitrous hypothyroidism 5\; and spastic ataxia 8.
WBGene00000453	ceh-32	W05E10.3	HGNC:SIX3|EnsEMBL-Compara;OrthoInspector;PhylomeDB;Panther;Roundup;OrthoFinder, HGNC:SIX6|OrthoInspector;EnsEMBL-Compara;PhylomeDB;Panther;Roundup;OrthoFinder, HGNC:SIX5|ParaSite-Compara, HGNC:SIX4|ParaSite-Compara	Is an ortholog of human SIX3 (SIX homeobox 3) and SIX6 (SIX homeobox 6). Is predicted to have DNA-binding transcription factor activity, RNA polymerase II-specific and transcription regulatory region sequence-specific DNA binding activity. Is involved in post-embryonic animal morphogenesis. Localizes to nucleus. Is expressed in anterior hypodermis\; gonadal sheath cell\; head ganglion\; intestine…
WBGene00007929	dmd-10	C34D1.1	HGNC:DMRTB1|EnsEMBL-Compara;TreeFam;Panther;OrthoFinder;ParaSite-Compara, HGNC:DMRT1|EnsEMBL-Compara;Panther;OrthoFinder;ParaSite-Compara, HGNC:DMRT3|ParaSite-Compara, HGNC:DMRT2|ParaSite-Compara, HGNC:DMRTC2|ParaSite-Compara, HGNC:DMRTC1|ParaSite-Compara, HGNC:DMRTC1B|ParaSite-Compara	Is an ortholog of human DMRTB1 (DMRT like family B with proline rich C-terminal 1). Is predicted to have DNA-binding transcription factor activity\; metal ion binding activity\; and sequence-specific DNA binding activity. Is expressed in body wall musculature\; head neurons\; intestine\; and vulval muscle.
WBGene00007932	zip-5	C34D1.5	N.A.	Is predicted to have DNA-binding transcription factor activity, RNA polymerase II-specific and RNA polymerase II regulatory region sequence-specific DNA binding activity. Is expressed in head muscle\; head neurons\; tail neurons\; and ventral nerve cord.
WBGene00003222	mes-4	Y2H9A.1	HGNC:NSD3|Hieranoid;Roundup;PhylomeDB;ParaSite-Compara, HGNC:NSD2|Hieranoid;Roundup;PhylomeDB;ParaSite-Compara, HGNC:KMT2B|ParaSite-Compara, HGNC:KMT2A|ParaSite-Compara, HGNC:SETDB2|ParaSite-Compara, ENSG00000285827|ParaSite-Compara, HGNC:ASH1L|ParaSite-Compara, HGNC:SETBP1|ParaSite-Compara, HGNC:EHMT2|ParaSite-Compara, HGNC:NSD1|ParaSite-Compara, HGNC:SETD1B|ParaSite-Compara, HGNC:KMT2D|ParaSite…	Is an ortholog of human NSD2 (nuclear receptor binding SET domain protein 2) and NSD3 (nuclear receptor binding SET domain protein 3). Exhibits histone methyltransferase activity (H3-K36 specific). Is involved in germ-line sex determination\; histone H3-K36 methylation\; and regulation of gene expression. Localizes to X chromosome\; autosome\; and nuclear chromosome. Is expressed in Z2\; Z3\; and…
WBGene00001062	dpr-1	R10D12.2	N.A.	Is predicted to have DNA-binding transcription factor activity\; sequence-specific DNA binding activity\; and zinc ion binding activity.
WBGene00001310	end-1	F58E10.2	HGNC:GATA5|ParaSite-Compara, HGNC:GATA1|ParaSite-Compara, HGNC:ZGLP1|ParaSite-Compara, HGNC:GATA4|ParaSite-Compara, HGNC:GATA3|ParaSite-Compara, HGNC:GATA6|ParaSite-Compara, HGNC:TRPS1|ParaSite-Compara	Exhibits DNA-binding transcription activator activity, RNA polymerase II-specific. Is involved in endodermal cell fate specification and positive regulation of transcription by RNA polymerase II. Localizes to nucleus. Is expressed in E\; E lineage cell\; Ea\; and Ep. Human ortholog(s) of this gene are implicated in several diseases, including Down syndrome\; congenital heart disease (multiple)\; …
WBGene00001311	end-3	F58E10.5	N.A.	Is predicted to have DNA-binding transcription factor activity, RNA polymerase II-specific and RNA polymerase II cis-regulatory region sequence-specific DNA binding activity. Is involved in endodermal cell fate specification and mesodermal cell fate specification. Localizes to nucleus. Is expressed in E\; E lineage cell\; Ea\; Ep\; and intestine.
WBGene00006775	unc-39	F56A12.1	HGNC:SIX5|TreeFam;Panther;EnsEMBL-Compara;ParaSite-Compara, HGNC:SIX4|TreeFam;Panther;EnsEMBL-Compara;ParaSite-Compara	Is an ortholog of human SIX4 (SIX homeobox 4) and SIX5 (SIX homeobox 5). Is predicted to have DNA-binding transcription factor activity, RNA polymerase II-specific and transcription regulatory region sequence-specific DNA binding activity. Is involved in several processes, including generation of neurons\; mesodermal cell migration\; and oviposition. Localizes to nucleus. Is expressed in several …
WBGene00007616	rpoa-12	C15H11.8	HGNC:ZNRD1|EnsEMBL-Compara;OrthoInspector;PhylomeDB;Hieranoid;Panther;Roundup;Inparanoid;OrthoFinder;OMA;ParaSite-Compara	Is an ortholog of human ZNRD1 (zinc ribbon domain containing 1). Is predicted to contribute to RNA polymerase I activity.
WBGene00011253	R11H6.5	R11H6.5	HGNC:ILF2|OrthoInspector;EnsEMBL-Compara;PhylomeDB;Hieranoid;Panther;Roundup;Inparanoid;OrthoFinder;OMA;ParaSite-Compara	Is an ortholog of human ILF2 (interleukin enhancer binding factor 2). Is expressed in pharyngeal neurons. Is predicted to encode a protein with the following domains: DZF domain and DZF domain.
WBGene00009488	oac-20	F36G9.12	N.A.	Is predicted to have transferase activity, transferring acyl groups other than amino-acyl groups.
WBGene00001161	efl-1	Y102A5C.18	HGNC:E2F5|EnsEMBL-Compara;OrthoInspector;PhylomeDB;Hieranoid;Roundup;TreeFam;Inparanoid;OrthoFinder;Panther;ParaSite-Compara, HGNC:E2F4|EnsEMBL-Compara;OrthoInspector;PhylomeDB;Hieranoid;Roundup;TreeFam;OrthoFinder;Inparanoid;Panther, HGNC:E2F3|OrthoInspector;Panther;Roundup, HGNC:E2F1|ParaSite-Compara, HGNC:E2F6|ParaSite-Compara	Is an ortholog of human E2F5 (E2F transcription factor 5). Exhibits protein C-terminus binding activity\; protein N-terminus binding activity\; and transcription factor binding activity. Is involved in several processes, including embryonic digestive tract morphogenesis\; negative regulation of Ras protein signal transduction\; and negative regulation of vulval development. Is expressed in gonad.
WBGene00005425	srh-215	T20B3.3	N.A.	Is enriched in NSM and muscle cell based on tiling array and microarray studies. Is affected by several genes including clk-1\; dpy-21\; and drh-3 based on tiling array\; microarray\; and RNA-seq studies. Is affected by fluoranthene and allantoin based on microarray studies. Is predicted to encode a protein with the following domains: Serpentine type 7TM GPCR chemoreceptor Srh and 7TM GPCR, serpe…
WBGene00013468	srz-96	Y68A4A.6	N.A.	Is enriched in muscle cell based on microarray studies. Is affected by blmp-1\; sir-2.1\; and tdp-1 based on microarray studies. Is predicted to encode a protein with the following domains: Serpentine type 7TM GPCR chemoreceptor Srz and 7TM GPCR, serpentine receptor class z (Srz).
WBGene00012694	gtf-2F2	Y39B6A.36	HGNC:GTF2F2|EnsEMBL-Compara;OrthoInspector;PhylomeDB;Hieranoid;Panther;Roundup;TreeFam;Inparanoid;OrthoFinder;OMA;ParaSite-Compara	Is an ortholog of human GTF2F2 (general transcription factor IIF subunit 2). Is predicted to have ATP binding activity\; DNA binding activity\; and DNA helicase activity.
WBGene00012446	nhr-230	Y17D7A.1	HGNC:PPARA|EnsEMBL-Compara;PhylomeDB	Is predicted to have DNA-binding transcription factor activity\; sequence-specific DNA binding activity\; and zinc ion binding activity.
WBGene00007724	C25F9.4	C25F9.4	N.A.	Is predicted to have ATP binding activity.
WBGene00007725	C25F9.5	C25F9.5	N.A.	Is predicted to have ATP binding activity.
WBGene00007728	C25F9.9	C25F9.9	N.A.	Is enriched in intestine based on tiling array\; RNA-seq\; and microarray studies. Is affected by several genes including daf-2\; daf-12\; and elt-2 based on microarray and RNA-seq studies. Is affected by five chemicals including tryptophan\; Rifampin\; and Sirolimus based on microarray and RNA-seq studies. Is predicted to encode a protein with the following domain: .
WBGene00012822	Y43F8B.12	Y43F8B.12	N.A.	Is enriched in intestine based on tiling array and RNA-seq studies. Is affected by several genes including glp-1\; skn-1\; and elt-2 based on microarray and RNA-seq studies. Is affected by nine chemicals including Tunicamycin\; bisphenol S\; and Rifampin based on RNA-seq and microarray studies. Is predicted to encode a protein with the following domain: .
WBGene00012823	Y43F8B.13	Y43F8B.13	N.A.	Is enriched in head mesodermal cell and intestine based on tiling array and RNA-seq studies. Is affected by several genes including daf-16\; age-1\; and daf-12 based on microarray and RNA-seq studies. Is affected by six chemicals including methylmercuric chloride\; Tunicamycin\; and Zidovudine based on microarray and RNA-seq studies. Is predicted to encode a protein with the following domain: .
WBGene00012824	Y43F8B.14	Y43F8B.14	N.A.	Is predicted to have ATP binding activity.
WBGene00010851	M04C3.2	M04C3.2	N.A.	Is predicted to have ATP binding activity. Is involved in innate immune response.
WBGene00012832	dmd-3	Y43F8C.10	HGNC:DMRT2|Panther;Roundup;EnsEMBL-Compara;OrthoFinder;ParaSite-Compara, HGNC:DMRT3|ParaSite-Compara, HGNC:DMRTB1|ParaSite-Compara, HGNC:DMRTC2|ParaSite-Compara, HGNC:DMRTC1|ParaSite-Compara, HGNC:DMRT1|ParaSite-Compara, HGNC:DMRTC1B|ParaSite-Compara	Is an ortholog of human DMRT2 (doublesex and mab-3 related transcription factor 2). Is predicted to have DNA-binding transcription factor activity\; metal ion binding activity\; and sequence-specific DNA binding activity. Is involved in several processes, including nematode male tail tip morphogenesis\; neuron differentiation\; and regulation of gene expression. Localizes to neuronal cell body. I…
WBGene00004203	swsn-1	Y113G7B.23	HGNC:SMARCC2|OrthoInspector;EnsEMBL-Compara;PhylomeDB;Hieranoid;Panther;Roundup;TreeFam;Inparanoid;OrthoFinder, HGNC:SMARCC1|EnsEMBL-Compara;OrthoInspector;PhylomeDB;Hieranoid;Panther;Roundup;TreeFam;Inparanoid;OrthoFinder	Is an ortholog of human SMARCC1 (SWI\/SNF related, matrix associated, actin dependent regulator of chromatin subfamily c member 1) and SMARCC2 (SWI\/SNF related, matrix associated, actin dependent regulator of chromatin subfamily c member 2). Exhibits identical protein binding activity. Is involved in several processes, including gonad development\; negative regulation of vulval development\; and…
WBGene00004013	pha-4	F38A6.1	HGNC:FOXA3|TreeFam;EnsEMBL-Compara;PhylomeDB;OrthoFinder, HGNC:FOXA2|TreeFam;EnsEMBL-Compara;PhylomeDB;OrthoFinder;ParaSite-Compara, HGNC:FOXA1|TreeFam;EnsEMBL-Compara;PhylomeDB;OrthoInspector;OrthoFinder	Is an ortholog of human FOXA1 (forkhead box A1) and FOXA2 (forkhead box A2). Exhibits DNA-binding transcription factor activity, RNA polymerase II-specific and sequence-specific DNA binding activity. Is involved in several processes, including pharynx development\; positive regulation of cellular metabolic process\; and response to sodium arsenite. Localizes to nucleus. Is expressed in several st…
WBGene00019864	ceh-93	R04A9.5	N.A.	Is predicted to have DNA-binding transcription repressor activity, RNA polymerase II-specific and RNA polymerase II regulatory region sequence-specific DNA binding activity. Is expressed in seam cell.
WBGene00006551	tbx-32	ZK380.1	N.A.	Is predicted to have DNA-binding transcription activator activity, RNA polymerase II-specific\; RNA polymerase II activating transcription factor binding activity\; and RNA polymerase II regulatory region sequence-specific DNA binding activity.
WBGene00006550	tbx-31	C36C9.2	N.A.	Is predicted to have DNA-binding transcription activator activity, RNA polymerase II-specific\; RNA polymerase II activating transcription factor binding activity\; and RNA polymerase II regulatory region sequence-specific DNA binding activity.
WBGene00006560	tbx-41	T26C11.1	N.A.	Is predicted to have DNA-binding transcription activator activity, RNA polymerase II-specific\; RNA polymerase II activating transcription factor binding activity\; and RNA polymerase II regulatory region sequence-specific DNA binding activity.
WBGene00019436	K06A9.2	K06A9.2	N.A.	Is enriched in GABAergic neurons\; body wall musculature\; head mesodermal cell\; and muscle cell based on RNA-seq and microarray studies. Is affected by several genes including daf-16\; daf-2\; and glp-1 based on RNA-seq and microarray studies. Is affected by eleven chemicals including tert-Butylhydroperoxide\; Psoralens\; and allantoin based on RNA-seq and microarray studies. Is predicted to en…
WBGene00000444	ceh-21	T26C11.6	HGNC:ONECUT1|ParaSite-Compara, HGNC:ONECUT2|ParaSite-Compara, ENSG00000205922|ParaSite-Compara	Is predicted to have DNA binding activity. Is expressed widely.
WBGene00003018	lin-32	T14F9.5	HGNC:ATOH1|EnsEMBL-Compara;OrthoInspector;Panther;Roundup;OrthoFinder;ParaSite-Compara, HGNC:ATOH7|Panther;EnsEMBL-Compara;Roundup;ParaSite-Compara, HGNC:NEUROD6|ParaSite-Compara, HGNC:NEUROD2|ParaSite-Compara, ENSG00000123307|ParaSite-Compara, HGNC:NEUROG2|ParaSite-Compara, HGNC:OLIG1|ParaSite-Compara, HGNC:BHLHE23|ParaSite-Compara, HGNC:BHLHE22|ParaSite-Compara, HGNC:NEUROG3|ParaSite-Compara, H…	Is an ortholog of human ATOH1 (atonal bHLH transcription factor 1). Exhibits protein heterodimerization activity\; protein homodimerization activity\; and sequence-specific DNA binding activity. Is involved in several processes, including embryo development\; nematode male tail tip morphogenesis\; and neuron development. Localizes to nucleus. Is expressed in several structures, including QL.a\; Q…
WBGene00001959	hlh-15	C43H6.8	HGNC:NHLH2|EnsEMBL-Compara;OrthoInspector;PhylomeDB;Panther;Roundup;Inparanoid;Hieranoid;OrthoFinder;ParaSite-Compara, HGNC:NHLH1|EnsEMBL-Compara;OrthoInspector;PhylomeDB;Panther;Roundup;OrthoFinder;Inparanoid;Hieranoid;ParaSite-Compara, HGNC:LYL1|ParaSite-Compara	Is an ortholog of human NHLH1 (nescient helix-loop-helix 1) and NHLH2 (nescient helix-loop-helix 2). Exhibits RNA polymerase II transcription factor binding activity.
WBGene00018591	npax-2	F48B9.5	HGNC:RHOXF1|ParaSite-Compara, HGNC:PROP1|ParaSite-Compara, HGNC:PAX2|ParaSite-Compara, HGNC:ALX4|ParaSite-Compara, HGNC:GSC2|ParaSite-Compara, HGNC:PRRX2|ParaSite-Compara, HGNC:OTX1|ParaSite-Compara, HGNC:SEBOX|ParaSite-Compara, HGNC:PAX6|ParaSite-Compara, HGNC:HESX1|ParaSite-Compara, HGNC:SHOX2|ParaSite-Compara, HGNC:ARX|ParaSite-Compara, HGNC:PAX8|ParaSite-Compara, HGNC:RAX|ParaSite-Compara, HG…	Is predicted to have DNA binding activity. Is expressed in head neurons\; hypodermis\; and vulF. Human ortholog(s) of this gene are implicated in several diseases, including Waardenburg's syndrome (multiple)\; diabetes mellitus (multiple)\; and eye disease (multiple).
WBGene00001400	fax-1	F56E3.4	HGNC:NR2E3|OrthoInspector;PhylomeDB;Hieranoid;Panther;Roundup;OrthoFinder;EnsEMBL-Compara;ParaSite-Compara	Is an ortholog of human NR2E3 (nuclear receptor subfamily 2 group E member 3). Exhibits DNA-binding transcription factor activity and sequence-specific DNA binding activity. Is involved in several processes, including neuron fate specification\; regulation of backward locomotion\; and regulation of forward locomotion. Localizes to nucleus. Is expressed in several structures, including CEP\; herma…
WBGene00019550	K09C4.5	K09C4.5	HGNC:SLC2A14|ParaSite-Compara, HGNC:SLC2A10|ParaSite-Compara, HGNC:SLC2A8|ParaSite-Compara, HGNC:SLC2A7|ParaSite-Compara, HGNC:SLC2A11|ParaSite-Compara, HGNC:SLC2A4|ParaSite-Compara, HGNC:SLC2A1|ParaSite-Compara, HGNC:SLC2A6|ParaSite-Compara, HGNC:SLC2A12|ParaSite-Compara, HGNC:SLC2A9|ParaSite-Compara, ENSG00000251357|ParaSite-Compara, HGNC:SLC2A3|ParaSite-Compara, HGNC:SLC2A2|ParaSite-Compara, H…	Is predicted to have transmembrane transporter activity. Human ortholog(s) of this gene are implicated in several diseases, including arterial tortuosity syndrome\; dystonia (multiple)\; and idiopathic generalized epilepsy 12.
WBGene00015355	C02F12.5	C02F12.5	HGNC:LRP11|ParaSite-Compara, HGNC:AMBP|ParaSite-Compara, HGNC:SPINT1|ParaSite-Compara, HGNC:SPINT4|ParaSite-Compara, HGNC:EPPIN|ParaSite-Compara, HGNC:WFIKKN1|ParaSite-Compara, HGNC:SPINT2|ParaSite-Compara, HGNC:TFPI|ParaSite-Compara, HGNC:WFDC8|ParaSite-Compara, HGNC:KIAA0319L|ParaSite-Compara, HGNC:EPPIN-WFDC6|ParaSite-Compara, HGNC:TFPI2|ParaSite-Compara, HGNC:KIAA0319|ParaSite-Compara, HGNC:W…	Is predicted to have serine-type endopeptidase inhibitor activity. Human ortholog(s) of this gene are implicated in congenital secretory sodium diarrhea 3.
WBGene00001434	fkh-2	T14G12.4	HGNC:FOXL1|Inparanoid;Roundup;OrthoFinder;Panther, HGNC:FOXC2|Roundup;Inparanoid;OrthoFinder;Panther, HGNC:FOXS1|Inparanoid;OrthoFinder;PhylomeDB;Panther;EnsEMBL-Compara, HGNC:FOXG1|EnsEMBL-Compara;OrthoInspector;Hieranoid;Roundup;TreeFam;OrthoFinder, HGNC:FOXJ2|ParaSite-Compara, HGNC:FOXI3|ParaSite-Compara, HGNC:FOXD4L3|ParaSite-Compara, HGNC:FOXR1|ParaSite-Compara, HGNC:FOXD4|ParaSite-Compara, …	Is an ortholog of human FOXG1 (forkhead box G1). Exhibits DNA-binding transcription factor activity. Is involved in several processes, including nematode larval development\; neuron differentiation\; and non-motile cilium assembly. Localizes to nucleus. Is expressed in several structures, including AWB\; Daaa\; body wall muscle cell from D lineage\; head muscle\; and somatic nervous system. Human…
WBGene00000441	ceh-18	ZC64.3	HGNC:POU2F1|EnsEMBL-Compara;Panther;PhylomeDB;OrthoFinder, HGNC:POU2F3|EnsEMBL-Compara;PhylomeDB;Panther;Roundup;TreeFam;Inparanoid;OrthoFinder;ParaSite-Compara, HGNC:POU2F2|Panther;EnsEMBL-Compara;PhylomeDB;OrthoFinder, HGNC:POU5F1B|Panther;EnsEMBL-Compara;PhylomeDB;ParaSite-Compara, HGNC:POU5F1|ParaSite-Compara, HGNC:HDX|ParaSite-Compara, HGNC:POU3F3|ParaSite-Compara, HGNC:CCDC160|ParaSite-Comp…	Is an ortholog of human POU2F3 (POU class 2 homeobox 3). Is predicted to have DNA-binding transcription activator activity, RNA polymerase II-specific. Is involved in epidermis development\; gamete generation\; and negative regulation of oocyte maturation. Localizes to nucleus. Is expressed in body wall musculature\; gonad\; neurons\; non-striated muscle\; and somatic nervous system.
WBGene00002987	lim-4	ZC64.4	HGNC:LHX6|EnsEMBL-Compara;OrthoInspector;PhylomeDB;Hieranoid;Panther;Roundup;TreeFam;OrthoFinder;Inparanoid;ParaSite-Compara, HGNC:LHX8|OrthoInspector;EnsEMBL-Compara;PhylomeDB;Hieranoid;Panther;Roundup;TreeFam;OrthoFinder;Inparanoid;ParaSite-Compara, HGNC:ZFHX4|ParaSite-Compara, HGNC:FHL1|ParaSite-Compara, HGNC:CRIP3|ParaSite-Compara, HGNC:LHX3|ParaSite-Compara, HGNC:LMX1B|ParaSite-Compara, HGNC…	Is an ortholog of human LHX6 (LIM homeobox 6) and LHX8 (LIM homeobox 8). Exhibits RNA polymerase II regulatory region sequence-specific DNA binding activity. Is involved in cell fate specification and regulation of transcription, DNA-templated. Localizes to nucleus. Is expressed in several structures, including ABalpppppa\; ABpraaappa\; head muscle\; head neurons\; and somatic nervous system. Hum…
WBGene00015716	sox-4	C12D12.5	HGNC:SOX15|Panther;OrthoFinder;ParaSite-Compara, HGNC:SRY|EnsEMBL-Compara;Panther;OrthoFinder;ParaSite-Compara, HGNC:SOX9|ParaSite-Compara, HGNC:SOX4|ParaSite-Compara, HGNC:SOX7|ParaSite-Compara, HGNC:SOX10|ParaSite-Compara, HGNC:SOX21|ParaSite-Compara, HGNC:SOX11|ParaSite-Compara, HGNC:SOX6|ParaSite-Compara, HGNC:SOX13|ParaSite-Compara, HGNC:SOX12|ParaSite-Compara, HGNC:SOX5|ParaSite-Compara, HG…	Is an ortholog of human SRY (sex determining region Y). Is predicted to have DNA-binding transcription factor activity, RNA polymerase II-specific. Is involved in innate immune response. Human ortholog(s) of this gene are implicated in several diseases, including 46 XY gonadal dysgenesis\; PCWH syndrome\; and Waardenburg's syndrome (multiple).
WBGene00001957	hlh-13	F48D6.3	HGNC:PTF1A|EnsEMBL-Compara;OrthoInspector;Roundup;TreeFam;OrthoFinder, HGNC:FERD3L|OrthoInspector;Roundup;OrthoFinder, HGNC:TWIST2|ParaSite-Compara	Is an ortholog of human PTF1A (pancreas associated transcription factor 1a). Exhibits transcription factor binding activity. Is involved in dauer exit\; insulin receptor signaling pathway\; and response to oxidative stress. Is expressed in neurons. Human ortholog(s) of this gene are implicated in Barber-Say syndrome and ablepharon macrostomia syndrome.
WBGene00001821	ham-2	C07A12.1	N.A.	Is predicted to have DNA-binding transcription factor activity. Is involved in cell fate determination\; cell migration\; and regulation of neuron differentiation. Localizes to nucleus.
WBGene00016600	ets-5	C42D8.4	HGNC:FLI1|Panther;EnsEMBL-Compara;Roundup;OrthoFinder, HGNC:FEV|OrthoInspector;PhylomeDB;Roundup;TreeFam;OrthoFinder;Hieranoid, HGNC:ERG|Panther;Roundup;EnsEMBL-Compara;OrthoFinder;ParaSite-Compara, HGNC:ETV5|ParaSite-Compara, HGNC:ETV2|ParaSite-Compara, HGNC:SPI1|ParaSite-Compara, HGNC:ETV7|ParaSite-Compara, HGNC:ETV6|ParaSite-Compara, ENSG00000142539|ParaSite-Compara, HGNC:SPIC|ParaSite-Compara…	Is an ortholog of human FEV (FEV transcription factor, ETS family member). Is predicted to have DNA-binding transcription factor activity, RNA polymerase II-specific. Is expressed in nervous system. Human ortholog(s) of this gene are implicated in acute myeloid leukemia.
WBGene00003377	mls-2	C39E6.4	HGNC:HMX2|OrthoInspector;EnsEMBL-Compara;Hieranoid;Panther;TreeFam;OrthoFinder, HGNC:HMX3|OrthoInspector;EnsEMBL-Compara;Hieranoid;Panther;TreeFam;OrthoFinder, HGNC:HMX1|OrthoInspector;EnsEMBL-Compara;Hieranoid;Panther;TreeFam;OrthoFinder;ParaSite-Compara	Is an ortholog of human HMX1 (H6 family homeobox 1). Exhibits RNA polymerase II regulatory region sequence-specific DNA binding activity. Is involved in several processes, including establishment of mitotic spindle orientation\; neuron differentiation involved in amphid sensory organ development\; and regulation of mesodermal cell fate specification. Localizes to nucleus. Is expressed in several …
WBGene00022500	lfi-1	ZC8.4	HGNC:CROCC|Panther;Roundup;TreeFam;Inparanoid;OMA;OrthoInspector;OrthoFinder, HGNC:CEP250|TreeFam;Panther;Inparanoid;EnsEMBL-Compara;OrthoInspector;ParaSite-Compara, HGNC:CROCC2|Panther;Inparanoid;OrthoFinder;ParaSite-Compara	Is an ortholog of human CROCC (ciliary rootlet coiled-coil, rootletin). Localizes to kinetochore microtubule and nucleus.
WBGene00001182	egl-13	T22B7.1	HGNC:SOX5|EnsEMBL-Compara;TreeFam;Panther;Roundup;OrthoInspector;OrthoFinder;ParaSite-Compara, HGNC:SOX13|Panther;TreeFam;EnsEMBL-Compara;OrthoInspector;ParaSite-Compara, HGNC:SOX6|Panther;TreeFam;OrthoInspector;Roundup;EnsEMBL-Compara;OrthoFinder;ParaSite-Compara, HGNC:SOX11|ParaSite-Compara, HGNC:SOX12|ParaSite-Compara, HGNC:SOX7|ParaSite-Compara, HGNC:SRY|ParaSite-Compara, HGNC:SOX4|ParaSite-C…	Is an ortholog of human SOX5 (SRY-box transcription factor 5) and SOX6 (SRY-box transcription factor 6). Is predicted to have DNA-binding transcription factor activity, RNA polymerase II-specific. Is involved in several processes, including cell fate specification\; generation of neurons\; and vulval development. Localizes to nucleus. Is expressed in several structures, including developing herma…
WBGene00020485	ceh-54	T13C5.4	HGNC:RHOXF1|ParaSite-Compara, HGNC:PROP1|ParaSite-Compara, HGNC:ALX4|ParaSite-Compara, HGNC:PRRX2|ParaSite-Compara, HGNC:OTX1|ParaSite-Compara, HGNC:PHOX2B|ParaSite-Compara, HGNC:SEBOX|ParaSite-Compara, HGNC:ALX3|ParaSite-Compara, HGNC:PAX6|ParaSite-Compara, HGNC:HESX1|ParaSite-Compara, HGNC:PAX8|ParaSite-Compara, HGNC:RAX|ParaSite-Compara, HGNC:PAX4|ParaSite-Compara, HGNC:EVX1|ParaSite-Compara, …	Is predicted to have DNA-binding transcription factor activity, RNA polymerase II-specific and RNA polymerase II regulatory region sequence-specific DNA binding activity. Is expressed in head neurons. Human ortholog(s) of this gene are implicated in several diseases, including WAGR syndrome\; diabetes mellitus (multiple)\; and eye disease (multiple).
WBGene00006424	ctbp-1	F49E10.5	HGNC:CTBP2|OrthoInspector;EnsEMBL-Compara;PhylomeDB;Panther;Roundup;TreeFam;OrthoFinder;ParaSite-Compara, HGNC:CTBP1|EnsEMBL-Compara;OrthoInspector;PhylomeDB;Panther;Roundup;TreeFam;OrthoFinder, HGNC:GRHPR|ParaSite-Compara	Is an ortholog of human CTBP2 (C-terminal binding protein 2). Is predicted to have several functions, including DNA binding activity\; NAD binding activity\; and metal ion binding activity. Localizes to nucleus. Is expressed in hypodermis and nervous system. Is used to study alcohol use disorder. Human ortholog(s) of this gene are implicated in primary hyperoxaluria.
WBGene00017687	ets-4	F22A3.1	HGNC:SPDEF|OrthoInspector;EnsEMBL-Compara;PhylomeDB;Hieranoid;Panther;Roundup;TreeFam;Inparanoid;OrthoFinder;ParaSite-Compara	Is an ortholog of human SPDEF (SAM pointed domain containing ETS transcription factor). Is predicted to have DNA-binding transcription factor activity, RNA polymerase II-specific. Localizes to nucleus. Is expressed in several structures, including P1\; germ line\; head\; socket cell\; and sperm.
WBGene00017690	ceh-60	F22A3.5	HGNC:TGIF2LX|Panther;EnsEMBL-Compara;ParaSite-Compara, HGNC:TGIF2LY|EnsEMBL-Compara;Panther;ParaSite-Compara, HGNC:TGIF1|EnsEMBL-Compara;Panther;ParaSite-Compara, HGNC:PBX3|ParaSite-Compara, HGNC:PBX4|ParaSite-Compara, HGNC:PBX1|ParaSite-Compara, HGNC:PKNOX1|ParaSite-Compara, HGNC:MEIS3|ParaSite-Compara, HGNC:MEIS1|ParaSite-Compara, HGNC:TGIF2|ParaSite-Compara, HGNC:MEIS2|ParaSite-Compara, HGNC:P…	Is an ortholog of human TGIF1 (TGFB induced factor homeobox 1)\; TGIF2LX (TGFB induced factor homeobox 2 like X-linked)\; and TGIF2LY (TGFB induced factor homeobox 2 like Y-linked). Is predicted to have DNA binding activity. Is expressed in amphid neurons and sensory neurons. Human ortholog(s) of this gene are implicated in holoprosencephaly 4.
WBGene00003163	mdl-1	R03E9.1	HGNC:MXD3|EnsEMBL-Compara;PhylomeDB;Panther;Roundup;TreeFam;OrthoFinder;OrthoInspector;Hieranoid;ParaSite-Compara, HGNC:MXI1|EnsEMBL-Compara;PhylomeDB;Panther;Roundup;TreeFam;OrthoFinder;OrthoInspector;Hieranoid;ParaSite-Compara, HGNC:MXD4|TreeFam;Panther;OrthoFinder;PhylomeDB;EnsEMBL-Compara;OrthoInspector;Hieranoid;ParaSite-Compara, HGNC:MXD1|EnsEMBL-Compara;PhylomeDB;Panther;TreeFam;OrthoFinde…	Is an ortholog of human MXD3 (MAX dimerization protein 3) and MXI1 (MAX interactor 1, dimerization protein). Exhibits protein heterodimerization activity. Contributes to sequence-specific DNA binding activity. Is involved in determination of adult lifespan and regulation of cell differentiation. Localizes to nucleus and transcription factor complex. Is expressed in body wall musculature\; neurons…
WBGene00000438	ceh-14	F46C8.5	HGNC:LHX3|EnsEMBL-Compara;OrthoInspector;PhylomeDB;Hieranoid;Panther;Roundup;TreeFam;OrthoFinder;Inparanoid;ParaSite-Compara, HGNC:LHX4|OrthoInspector;EnsEMBL-Compara;PhylomeDB;Hieranoid;Panther;Roundup;TreeFam;Inparanoid;OrthoFinder;ParaSite-Compara, HGNC:ZFHX4|ParaSite-Compara, HGNC:FHL1|ParaSite-Compara, HGNC:CRIP3|ParaSite-Compara, HGNC:LMX1B|ParaSite-Compara, HGNC:LHX8|ParaSite-Compara, HGNC…	Is an ortholog of human LHX3 (LIM homeobox 3) and LHX4 (LIM homeobox 4). Exhibits RNA polymerase II regulatory region sequence-specific DNA binding activity. Is involved in neuron development\; positive regulation of transcription by RNA polymerase II\; and thermosensory behavior. Localizes to nucleus. Is expressed in several structures, including hypodermal cell\; neurons\; somatic nervous syste…
WBGene00020334	epg-7	T08A9.1	HGNC:RB1CC1|EnsEMBL-Compara;OrthoInspector;PhylomeDB;Hieranoid;Panther;Roundup;TreeFam;Inparanoid;OrthoFinder;OMA;ParaSite-Compara	Is an ortholog of human RB1CC1 (RB1 inducible coiled-coil 1). Exhibits molecular adaptor activity. Is involved in positive regulation of macroautophagy. Localizes to cytoplasm. Is expressed in neurons\; pharyngeal muscle cell\; and tail. Human ortholog(s) of this gene are implicated in breast cancer.
WBGene00004949	sox-2	K08A8.2	HGNC:SOX3|Panther;OrthoInspector;OrthoFinder, HGNC:SOX21|EnsEMBL-Compara;OrthoInspector;Hieranoid;Panther;Roundup;OrthoFinder, HGNC:SOX14|OrthoInspector;EnsEMBL-Compara;PhylomeDB;Hieranoid;Panther;Roundup;OrthoFinder, HGNC:SOX17|Roundup;OrthoFinder;PhylomeDB;Panther, HGNC:SOX1|OrthoInspector;Panther;OrthoFinder, HGNC:SOX7|Roundup;OrthoFinder;PhylomeDB;Panther, HGNC:SOX2|EnsEMBL-Compara;OrthoInspe…	Is an ortholog of human SOX14 (SRY-box transcription factor 14). Exhibits RNA polymerase II regulatory region sequence-specific DNA binding activity. Is involved in neuron fate specification. Is expressed in several structures, including head neurons\; hypodermis\; inner labial neurons\; neuroblasts\; and rectal epithelial cell. Human ortholog(s) of this gene are implicated in microphthalmia.
WBGene00001953	hlh-8	C02B8.4	HGNC:TWIST1|OrthoInspector;EnsEMBL-Compara;PhylomeDB;Panther;Roundup;OrthoFinder;ParaSite-Compara, HGNC:TWIST2|OrthoInspector;EnsEMBL-Compara;PhylomeDB;Panther;Roundup;OrthoFinder;ParaSite-Compara, HGNC:HAND2|TreeFam;EnsEMBL-Compara;Roundup;ParaSite-Compara, HGNC:MSC|ParaSite-Compara, HGNC:TCF24|ParaSite-Compara, HGNC:BHLHA9|ParaSite-Compara, HGNC:SCX|ParaSite-Compara, HGNC:TCF23|ParaSite-Compara…	Is an ortholog of human TWIST1 (twist family bHLH transcription factor 1) and TWIST2 (twist family bHLH transcription factor 2). Is predicted to have DNA binding activity and protein dimerization activity. Is involved in mesodermal cell fate specification\; positive regulation of transcription by RNA polymerase II\; and vulval cell fate specification. Is expressed in several structures, including…
WBGene00017571	jmjd-3.1	F18E9.5	HGNC:KDM6A|EnsEMBL-Compara;Panther;PhylomeDB;ParaSite-Compara, HGNC:UTY|Panther;EnsEMBL-Compara;PhylomeDB;ParaSite-Compara, HGNC:KDM6B|EnsEMBL-Compara;Panther;PhylomeDB;ParaSite-Compara	Is an ortholog of human KDM6A (lysine demethylase 6A)\; KDM6B (lysine demethylase 6B)\; and UTY (ubiquitously transcribed tetratricopeptide repeat containing, Y-linked). Exhibits histone demethylase activity (H3-K27 specific). Is involved in histone H3-K27 demethylation and transdifferentiation. Localizes to nucleus. Is expressed in PDA and Y cell. Human ortholog(s) of this gene are implicated in…
WBGene00006881	vab-15	R07B1.1	HGNC:MSX2|OrthoInspector;EnsEMBL-Compara;PhylomeDB;Panther;Roundup;TreeFam;Inparanoid;Hieranoid;OrthoFinder;ParaSite-Compara, HGNC:MSX1|EnsEMBL-Compara;OrthoInspector;PhylomeDB;Panther;Roundup;TreeFam;Inparanoid;Hieranoid;OrthoFinder	Is an ortholog of human MSX2 (msh homeobox 2). Is predicted to have DNA-binding transcription factor activity, RNA polymerase II-specific and RNA polymerase II regulatory region sequence-specific DNA binding activity. Is involved in embryonic morphogenesis\; locomotory behavior\; and parturition. Localizes to nucleus. Is expressed in several structures, including P1\; P12\; P2\; neuroblasts\; and…
WBGene00008951	F19C6.2	F19C6.2	HGNC:ECD|Panther;OrthoFinder;EnsEMBL-Compara;ParaSite-Compara	Is an ortholog of human ECD (ecdysoneless cell cycle regulator). Is predicted to encode a protein with the following domains: SGT1 protein and Ecd family.
WBGene00001250	elt-2	C33D3.1	HGNC:GATA4|EnsEMBL-Compara;TreeFam;Panther;OrthoFinder;ParaSite-Compara, HGNC:GATA5|Panther;TreeFam;EnsEMBL-Compara;OrthoFinder;ParaSite-Compara, HGNC:GATA6|EnsEMBL-Compara;TreeFam;Panther;ParaSite-Compara, HGNC:GATA1|ParaSite-Compara, HGNC:ZGLP1|ParaSite-Compara, HGNC:GATA3|ParaSite-Compara, HGNC:TRPS1|ParaSite-Compara	Is an ortholog of human GATA4 (GATA binding protein 4) and GATA5 (GATA binding protein 5). Exhibits DNA-binding transcription factor activity, RNA polymerase II-specific and RNA polymerase II regulatory region sequence-specific DNA binding activity. Is involved in several processes, including defense response to other organism\; endoderm development\; and nematode larval development. Localizes to…
WBGene00006870	vab-3	F14F3.1	HGNC:PAX6|OrthoInspector;PhylomeDB;Hieranoid;Panther;Roundup;TreeFam;Inparanoid;OrthoFinder, HGNC:RHOXF1|ParaSite-Compara, HGNC:PROP1|ParaSite-Compara, HGNC:PRRX2|ParaSite-Compara, HGNC:HESX1|ParaSite-Compara, HGNC:PITX3|ParaSite-Compara, HGNC:ESX1|ParaSite-Compara, HGNC:NOBOX|ParaSite-Compara, HGNC:RHOXF2B|ParaSite-Compara, HGNC:PAX4|ParaSite-Compara, HGNC:RAX|ParaSite-Compara, HGNC:RHOXF2|ParaS…	Is an ortholog of human PAX6 (paired box 6). Is predicted to have DNA-binding transcription factor activity. Is involved in several processes, including anterior\/posterior pattern specification\; nematode male tail tip morphogenesis\; and positive regulation of transcription by RNA polymerase II. Localizes to cytoplasm and nucleus. Is expressed in several structures, including anterior ganglion …
WBGene00000908	daf-12	F11A1.3	HGNC:VDR|OrthoInspector;PhylomeDB;Hieranoid;Panther;Roundup;OrthoFinder, HGNC:NR1H3|TreeFam;Inparanoid;PhylomeDB;Panther, HGNC:NR1I2|OrthoInspector;PhylomeDB;Hieranoid;Panther;Roundup;OrthoFinder, HGNC:NR1H4|Panther;Inparanoid;PhylomeDB, ENSG00000131408|TreeFam;Panther;Inparanoid	Is an ortholog of human NR1I2 (nuclear receptor subfamily 1 group I member 2) and VDR (vitamin D receptor). Exhibits nuclear receptor activity\; sequence-specific DNA binding activity\; and steroid hormone binding activity. Is involved in several processes, including chemotaxis to cAMP\; positive regulation of dauer larval development\; and response to biotin. Localizes to nucleus. Is expressed i…
WBGene00011315	mbr-1	T01C1.2	HGNC:LCORL|EnsEMBL-Compara;OrthoInspector;PhylomeDB;Hieranoid;Panther;Roundup;TreeFam;Inparanoid;OrthoFinder;ParaSite-Compara, HGNC:LCOR|OrthoInspector;PhylomeDB;Hieranoid;Panther;Roundup;TreeFam;Inparanoid;EnsEMBL-Compara;OrthoFinder	Is an ortholog of human LCORL (ligand dependent nuclear receptor corepressor like). Is predicted to have DNA binding activity. Is expressed in gonad\; intestine\; nerve ring neurons\; sensory neurons\; and vulva.
WBGene00044330	alr-1	R08B4.2	HGNC:ALX1|OrthoInspector;Roundup;Panther;EnsEMBL-Compara;ParaSite-Compara, HGNC:ARX|OrthoInspector;Roundup;EnsEMBL-Compara;Panther;OrthoFinder, HGNC:ALX3|Panther;EnsEMBL-Compara;Roundup;ParaSite-Compara, HGNC:RHOXF1|ParaSite-Compara, HGNC:PROP1|ParaSite-Compara, HGNC:ALX4|ParaSite-Compara, HGNC:PRRX2|ParaSite-Compara, HGNC:OTX1|ParaSite-Compara, HGNC:PHOX2B|ParaSite-Compara, HGNC:SEBOX|ParaSite-C…	Is an ortholog of human ALX1 (ALX homeobox 1) and ARX (aristaless related homeobox). Exhibits RNA polymerase II regulatory region sequence-specific DNA binding activity. Localizes to nucleus. Is expressed in several structures, including anterior hypodermis\; neurons\; pseudocoelom\; socket cell\; and somatic nervous system. Human ortholog(s) of this gene are implicated in several diseases, inclu…
WBGene00002261	ldb-1	F58A3.1	HGNC:LDB1|EnsEMBL-Compara;PhylomeDB;Hieranoid;Panther;Roundup;TreeFam;Inparanoid;OrthoFinder;OrthoInspector;ParaSite-Compara, HGNC:LDB2|EnsEMBL-Compara;OrthoInspector;PhylomeDB;Hieranoid;Panther;Roundup;TreeFam;Inparanoid;OrthoFinder;ParaSite-Compara	Is an ortholog of human LDB1 (LIM domain binding 1) and LDB2 (LIM domain binding 2). Exhibits DNA-binding transcription factor activity and LIM domain binding activity. Is involved in several processes, including mechanosensory behavior\; synapse assembly\; and vulval development. Is expressed in several structures, including AIY\; body wall musculature\; gonad\; neurons\; and vulval muscle.
WBGene00011614	nfya-1	T08D10.1	HGNC:NFYA|Panther;EnsEMBL-Compara;OrthoInspector;Roundup;OrthoFinder;ParaSite-Compara	Is an ortholog of human NFYA (nuclear transcription factor Y subunit alpha). Is predicted to have DNA-binding transcription activator activity, RNA polymerase II-specific and RNA polymerase II cis-regulatory region sequence-specific DNA binding activity. Localizes to nucleus. Is expressed in several structures, including excretory cell\; gonad\; head neurons\; oocyte\; and somatic nervous system.
WBGene00006654	ttx-3	C40H5.5	HGNC:LHX2|EnsEMBL-Compara;Hieranoid;Panther;Roundup;TreeFam;Inparanoid;OrthoFinder, HGNC:LHX9|OrthoInspector;Hieranoid;Panther;Roundup;TreeFam;Inparanoid;OMA;EnsEMBL-Compara;OrthoFinder;ParaSite-Compara, HGNC:CRIP3|ParaSite-Compara, HGNC:LHX3|ParaSite-Compara, HGNC:LHX8|ParaSite-Compara, HGNC:ZFHX4|ParaSite-Compara, HGNC:LHX6|ParaSite-Compara, HGNC:FHL1|ParaSite-Compara, HGNC:LMO4|ParaSite-Compar…	Is an ortholog of human LHX9 (LIM homeobox 9). Exhibits RNA polymerase II regulatory region sequence-specific DNA binding activity. Is involved in several processes, including generation of neurons\; thermosensory behavior\; and thermotaxis. Is expressed in head muscle\; head neurons\; and pharyngeal neurons. Human ortholog(s) of this gene are implicated in congenital ptosis\; hypopituitarism\; a…
WBGene00006388	taf-7.1	F54F7.1	HGNC:TAF7|OrthoInspector;EnsEMBL-Compara;PhylomeDB;Panther;Roundup;TreeFam;Inparanoid;OrthoFinder;ParaSite-Compara, HGNC:TAF7L|EnsEMBL-Compara;OrthoInspector;PhylomeDB;Panther;TreeFam;Inparanoid;OrthoFinder;ParaSite-Compara	Is an ortholog of human TAF7 (TATA-box binding protein associated factor 7). Is predicted to have several functions, including histone acetyltransferase binding activity\; histone acetyltransferase regulator activity\; and transcription factor binding activity.
WBGene00044079	tag-241	C34E11.3	HGNC:SOGA1|Panther;EnsEMBL-Compara;Inparanoid;OrthoFinder, HGNC:MTCL1|EnsEMBL-Compara;Panther;Inparanoid;OrthoInspector;OrthoFinder, HGNC:SOGA3|EnsEMBL-Compara;Panther;Roundup;OrthoFinder	Is an ortholog of human MTCL1 (microtubule crosslinking factor 1). Is predicted to encode a protein with the following domain: .
WBGene00000461	ceh-40	F17A2.5	HGNC:PBX1|Panther;TreeFam;EnsEMBL-Compara;PhylomeDB;ParaSite-Compara, HGNC:PBX4|Panther;TreeFam;EnsEMBL-Compara;PhylomeDB;ParaSite-Compara, HGNC:PBX2|Panther;TreeFam;EnsEMBL-Compara;PhylomeDB;OrthoFinder;ParaSite-Compara, HGNC:PBX3|TreeFam;Panther;OrthoFinder;PhylomeDB;ParaSite-Compara, HGNC:TGIF2LX|ParaSite-Compara, HGNC:TGIF2LY|ParaSite-Compara, HGNC:TGIF2|ParaSite-Compara, HGNC:PKNOX2|ParaSite…	Is an ortholog of human PBX2 (PBX homeobox 2). Is predicted to have DNA binding activity and DNA-binding transcription factor activity. Is expressed in dopaminergic neurons. Human ortholog(s) of this gene are implicated in holoprosencephaly 4.
WBGene00003180	med-1	T24D3.1	N.A.	Exhibits sequence-specific DNA binding activity. Is involved in endodermal cell fate specification and pharynx development. Localizes to nucleus. Is expressed in several structures, including MSaaaap\; MSaapap\; MSappp\; MSppapa\; and MSppapp.
WBGene00000222	atf-6	F45E6.2	HGNC:ATF6B|Hieranoid;Inparanoid;Roundup;PhylomeDB;EnsEMBL-Compara;OrthoInspector;Panther;OrthoFinder;ParaSite-Compara, HGNC:ATF6|OrthoInspector;PhylomeDB;Hieranoid;Roundup;Inparanoid;EnsEMBL-Compara;Panther;OrthoFinder;ParaSite-Compara, HGNC:CREB3L1|ParaSite-Compara, HGNC:CREB3L4|ParaSite-Compara, HGNC:CREM|ParaSite-Compara, HGNC:ATF1|ParaSite-Compara	Is an ortholog of human ATF6 (activating transcription factor 6) and ATF6B (activating transcription factor 6 beta). Exhibits RNA polymerase II regulatory region sequence-specific DNA binding activity. Is involved in ATF6-mediated unfolded protein response\; positive regulation of transcription from RNA polymerase II promoter involved in unfolded protein response\; and response to tunicamycin. Is…
WBGene00003854	odr-7	T18D3.2	N.A.	Exhibits DNA-binding transcription activator activity, RNA polymerase II-specific. Is involved in negative adaptation of signaling pathway\; positive chemotaxis\; and positive regulation of transcription by RNA polymerase II. Localizes to nucleus. Is expressed in AWAL and AWAR.
WBGene00011824	tsct-1	T18D3.7	HGNC:TSC22D3|EnsEMBL-Compara;PhylomeDB;Hieranoid;Panther;Roundup;OrthoFinder;Inparanoid;OrthoInspector;ParaSite-Compara, HGNC:TSC22D4|EnsEMBL-Compara;Roundup;PhylomeDB;OrthoInspector;OrthoFinder;ParaSite-Compara, HGNC:TSC22D2|EnsEMBL-Compara;OrthoInspector;OrthoFinder;ParaSite-Compara	Is an ortholog of human TSC22D3 (TSC22 domain family member 3). Is predicted to have DNA-binding transcription factor activity. Is expressed in body wall musculature\; nerve ring\; and pharyngeal muscle cell.
WBGene00000450	ceh-28	K03A11.3	HGNC:NKX2-6|EnsEMBL-Compara;Panther;Roundup;OrthoInspector;Hieranoid;OrthoFinder;ParaSite-Compara, HGNC:NKX6-2|ParaSite-Compara, HGNC:NKX6-1|ParaSite-Compara, HGNC:NKX3-2|ParaSite-Compara, HGNC:NKX3-1|ParaSite-Compara, HGNC:NKX2-2|ParaSite-Compara	Is an ortholog of human NKX2-6 (NK2 homeobox 6). Is predicted to have DNA-binding transcription factor activity, RNA polymerase II-specific and RNA polymerase II cis-regulatory region sequence-specific DNA binding activity. Is involved in positive regulation of transcription by RNA polymerase II and regulation of synapse organization. Is expressed in several structures, including ABalaappa\; ABal…
WBGene00001560	gei-3	T22H6.6	HGNC:CIC|ParaSite-Compara	Is predicted to have DNA binding activity. Is expressed in head neurons\; intestine\; and tail neurons. Human ortholog(s) of this gene are implicated in autosomal dominant mental retardation 45.
WBGene00003511	mxl-3	F46G10.6	HGNC:MAX|EnsEMBL-Compara;OrthoInspector;PhylomeDB;Panther;OrthoFinder;ParaSite-Compara	Is an ortholog of human MAX (MYC associated factor X). Exhibits DNA-binding transcription factor activity and RNA polymerase II regulatory region DNA binding activity. Is involved in regulation of fatty acid biosynthetic process by transcription from RNA polymerase II promoter. Localizes to cytoplasm and nucleus. Is expressed in AWCL\; AWCR\; neurons\; and pharynx. Is used to study diabetes melli…
WBGene00001436	fkh-4	C29F7.5	N.A.	Is predicted to have DNA-binding transcription factor activity, RNA polymerase II-specific. Localizes to nucleus.
WBGene00001435	fkh-3	C29F7.4	N.A.	Exhibits RNA polymerase II regulatory region sequence-specific DNA binding activity.
WBGene00007813	jmjd-3.3	C29F7.6	HGNC:KDM6A|Panther;TreeFam;EnsEMBL-Compara;PhylomeDB;ParaSite-Compara, HGNC:KDM6B|EnsEMBL-Compara;TreeFam;Panther;PhylomeDB;ParaSite-Compara, HGNC:UTY|EnsEMBL-Compara;TreeFam;Panther;PhylomeDB;ParaSite-Compara	Is an ortholog of human KDM6A (lysine demethylase 6A)\; KDM6B (lysine demethylase 6B)\; and UTY (ubiquitously transcribed tetratricopeptide repeat containing, Y-linked). Is predicted to have RNA polymerase II cis-regulatory region sequence-specific DNA binding activity\; chromatin DNA binding activity\; and histone demethylase activity (H3-K27 specific). Human ortholog(s) of this gene are implica…
WBGene00008527	set-8	F02D10.7	HGNC:KMT2B|ParaSite-Compara, HGNC:KMT2A|ParaSite-Compara, HGNC:SETDB2|ParaSite-Compara, HGNC:EHMT2|ParaSite-Compara, HGNC:EZH2|ParaSite-Compara, HGNC:NSD3|ParaSite-Compara, HGNC:NSD1|ParaSite-Compara, HGNC:SETBP1|ParaSite-Compara, HGNC:ASH1L|ParaSite-Compara, HGNC:KMT2C|ParaSite-Compara, HGNC:EZH1|ParaSite-Compara, HGNC:SETD1A|ParaSite-Compara, HGNC:SETDB1|ParaSite-Compara, HGNC:SUV39H1|ParaSite-…	Is predicted to have metal ion binding activity. Human ortholog(s) of this gene are implicated in several diseases, including Sotos syndrome\; Weaver syndrome\; and autosomal dominant non-syndromic intellectual disability (multiple).
WBGene00001251	elt-3	K02B9.4	HGNC:GATA1|ParaSite-Compara, HGNC:ZGLP1|ParaSite-Compara, HGNC:GATA4|ParaSite-Compara, HGNC:GATA3|ParaSite-Compara, HGNC:TRPS1|ParaSite-Compara	Exhibits RNA polymerase II regulatory region DNA binding activity. Is involved in determination of adult lifespan and positive regulation of transcription from RNA polymerase II promoter in response to increased salt. Localizes to nucleus. Is expressed in several structures, including Caaaaa\; Caaaap\; hermaphrodite distal tip cell\; hypodermal cell\; and rectum. Human ortholog(s) of this gene ar…
WBGene00010553	K04C1.3	K04C1.3	N.A.	Is predicted to have DNA-binding transcription factor activity and sequence-specific DNA binding activity.
WBGene00009231	ceh-89	F28H6.2	HGNC:HOPX|EnsEMBL-Compara;Panther;ParaSite-Compara	Is an ortholog of human HOPX (HOP homeobox). Is predicted to have DNA binding activity.
WBGene00000457	ceh-36	C37E2.4	HGNC:ARGFX|Panther;TreeFam;EnsEMBL-Compara, HGNC:OTX2|EnsEMBL-Compara;TreeFam;Panther;ParaSite-Compara, HGNC:OTX1|EnsEMBL-Compara;TreeFam;Panther;ParaSite-Compara, HGNC:RHOXF1|ParaSite-Compara, HGNC:PROP1|ParaSite-Compara, HGNC:ALX3|ParaSite-Compara, HGNC:ALX4|ParaSite-Compara, HGNC:ARX|ParaSite-Compara, HGNC:EVX1|ParaSite-Compara, HGNC:ESX1|ParaSite-Compara, HGNC:RHOXF2B|ParaSite-Compara, HGNC:P…	Is an ortholog of human OTX1 (orthodenticle homeobox 1) and OTX2 (orthodenticle homeobox 2). Exhibits RNA polymerase II regulatory region sequence-specific DNA binding activity. Is involved in neuron fate specification\; positive regulation of transcription by RNA polymerase II\; and sensory perception of chemical stimulus. Localizes to nucleus. Is expressed in ABaraappa\; ABaraappaa\; amphid neu…
WBGene00000458	ceh-37	C37E2.5	HGNC:OTX2|EnsEMBL-Compara;PhylomeDB;Hieranoid;Panther;TreeFam;OrthoInspector;ParaSite-Compara, HGNC:RHOXF1|ParaSite-Compara, HGNC:PROP1|ParaSite-Compara, HGNC:PAX2|ParaSite-Compara, HGNC:ALX4|ParaSite-Compara, HGNC:GSC2|ParaSite-Compara, HGNC:PRRX2|ParaSite-Compara, HGNC:OTX1|ParaSite-Compara, HGNC:PHOX2B|ParaSite-Compara, HGNC:SEBOX|ParaSite-Compara, HGNC:ALX3|ParaSite-Compara, HGNC:PITX1|ParaSi…	Is an ortholog of human OTX2 (orthodenticle homeobox 2). Exhibits DNA binding activity, bending and double-stranded telomeric DNA binding activity. Is involved in neuron fate specification\; olfactory behavior\; and regulation of transcription by RNA polymerase II. Localizes to nuclear chromosome, telomeric region. Is expressed in dorsal nerve cord\; excretory cell\; head\; and intestine. Human o…
WBGene00007776	dmd-4	C27C12.6	HGNC:DMRT3|EnsEMBL-Compara;OrthoInspector;PhylomeDB;Roundup;TreeFam;Inparanoid;OrthoFinder;ParaSite-Compara, HGNC:DMRTB1|ParaSite-Compara, HGNC:DMRTC2|ParaSite-Compara, HGNC:DMRT1|ParaSite-Compara, HGNC:DMRTC1|ParaSite-Compara, HGNC:DMRTC1B|ParaSite-Compara	Is an ortholog of human DMRT3 (doublesex and mab-3 related transcription factor 3). Is predicted to have DNA-binding transcription factor activity\; metal ion binding activity\; and sequence-specific DNA binding activity. Is expressed in neurons.
WBGene00001096	dsc-1	C18B12.3	HGNC:VSX1|ParaSite-Compara	Is predicted to have DNA binding activity. Is involved in positive regulation of defecation rhythm and regulation of transcription, DNA-templated. Localizes to cell projection\; cytoplasm\; and nucleus. Is expressed in amphid neurons\; enteric muscle\; and mechanosensory neurons. Human ortholog(s) of this gene are implicated in keratoconus.
WBGene00006743	unc-3	Y16B4A.1	HGNC:EBF2|OrthoInspector;EnsEMBL-Compara;PhylomeDB;Hieranoid;Panther;Inparanoid;OrthoFinder;OMA;ParaSite-Compara, HGNC:EBF3|EnsEMBL-Compara;OrthoInspector;PhylomeDB;Hieranoid;Panther;Roundup;Inparanoid;OrthoFinder;OMA;ParaSite-Compara, HGNC:EBF1|OrthoInspector;EnsEMBL-Compara;PhylomeDB;Hieranoid;Panther;Inparanoid;OrthoFinder;OMA;ParaSite-Compara, HGNC:EBF4|OrthoInspector;EnsEMBL-Compara;PhylomeD…	Is an ortholog of human EBF3 (EBF transcription factor 3). Exhibits RNA polymerase II regulatory region sequence-specific DNA binding activity\; histone acetyltransferase binding activity\; and identical protein binding activity. Is involved in several processes, including dauer larval development\; positive regulation of transcription by RNA polymerase II\; and regulation of neuron projection de…
WBGene00000221	atf-4	T04C10.4	HGNC:ATF4|Panther;EnsEMBL-Compara;OrthoFinder;ParaSite-Compara, HGNC:ATF5|EnsEMBL-Compara;Panther;OrthoFinder;ParaSite-Compara	Is an ortholog of human ATF4 (activating transcription factor 4) and ATF5 (activating transcription factor 5). Is predicted to have DNA-binding transcription factor activity, RNA polymerase II-specific and RNA polymerase II regulatory region sequence-specific DNA binding activity. Localizes to nucleus.
WBGene00009089	jmjd-3.2	F23D12.5	HGNC:KDM6A|TreeFam;Panther;PhylomeDB;EnsEMBL-Compara;ParaSite-Compara, HGNC:UTY|TreeFam;Panther;PhylomeDB;EnsEMBL-Compara;ParaSite-Compara, HGNC:KDM6B|TreeFam;Panther;PhylomeDB;EnsEMBL-Compara;ParaSite-Compara	Is an ortholog of human KDM6A (lysine demethylase 6A)\; KDM6B (lysine demethylase 6B)\; and UTY (ubiquitously transcribed tetratricopeptide repeat containing, Y-linked). Is predicted to have RNA polymerase II cis-regulatory region sequence-specific DNA binding activity\; chromatin DNA binding activity\; and histone demethylase activity (H3-K27 specific). Human ortholog(s) of this gene are implica…
WBGene00003602	nhr-3	H01A20.1	N.A.	Is predicted to have chromatin binding activity\; nuclear receptor activity\; and transcription regulatory region sequence-specific DNA binding activity. Is expressed in head neurons\; hypodermis\; muscle cell\; and ventral nerve cord.
WBGene00004950	sox-3	F40E10.2	HGNC:SOX21|EnsEMBL-Compara;OrthoInspector;Panther;Roundup;TreeFam;OrthoFinder, HGNC:SRY|Inparanoid;Panther;OrthoFinder, HGNC:SOX14|EnsEMBL-Compara;OrthoInspector;Panther;Roundup;TreeFam;OrthoFinder, HGNC:SOX2|OrthoInspector;Panther;OrthoFinder;PhylomeDB;ParaSite-Compara	Is an ortholog of human SOX14 (SRY-box transcription factor 14) and SOX21 (SRY-box transcription factor 21). Is predicted to have DNA-binding transcription factor activity, RNA polymerase II-specific and sequence-specific DNA binding activity. Is expressed in head neurons and rectal epithelial cell. Human ortholog(s) of this gene are implicated in microphthalmia.
WBGene00006462	svh-5	C33A11.4	HGNC:EHF|OrthoInspector;EnsEMBL-Compara;PhylomeDB;Hieranoid;Panther;TreeFam;OrthoFinder;ParaSite-Compara, HGNC:ELF3|EnsEMBL-Compara;OrthoInspector;PhylomeDB;Panther;TreeFam;OrthoFinder, HGNC:ELF5|OrthoInspector;EnsEMBL-Compara;PhylomeDB;Hieranoid;Panther;TreeFam;OrthoFinder;ParaSite-Compara, HGNC:ETV5|ParaSite-Compara, HGNC:ERG|ParaSite-Compara, HGNC:ETV2|ParaSite-Compara, HGNC:SPI1|ParaSite-Comp…	Is an ortholog of human EHF (ETS homologous factor) and ELF5 (E74 like ETS transcription factor 5). Is predicted to have DNA-binding transcription factor activity, RNA polymerase II-specific. Is expressed in intestine and neurons. Human ortholog(s) of this gene are implicated in acute myeloid leukemia.
WBGene00009560	psa-3	F39D8.2	N.A.	Exhibits RNA polymerase II transcription coactivator binding activity. Is involved in regulation of asymmetric cell division. Localizes to nucleus. Is expressed in several structures, including TL.aa\; TL.pa\; TR.aa\; TR.pa\; and hypodermal cell.
WBGene00012074	T27A8.2	T27A8.2	N.A.	Is predicted to have DNA-binding transcription factor activity and sequence-specific DNA binding activity. Is expressed in head muscle\; head neurons\; pharyngeal neurons\; somatic nervous system\; and tail.
WBGene00018033	F35B3.7	F35B3.7	HGNC:LZTS2|Panther;Roundup;PhylomeDB;EnsEMBL-Compara;OrthoInspector;OrthoFinder;ParaSite-Compara, HGNC:LZTS1|Roundup;EnsEMBL-Compara;OrthoFinder;ParaSite-Compara, HGNC:LZTS3|EnsEMBL-Compara;Roundup;OrthoFinder;ParaSite-Compara	Is an ortholog of human LZTS2 (leucine zipper tumor suppressor 2). Human ortholog(s) of this gene are implicated in esophageal cancer. Is predicted to encode a protein with the following domain: .
WBGene00020727	npr-21	T23C6.5	N.A.	Is predicted to have G protein-coupled peptide receptor activity. Is expressed in head neurons\; intestine\; tail neurons\; and ventral nerve cord.
WBGene00006986	zip-1	Y75B8A.35	N.A.	Is predicted to have DNA binding activity.
WBGene00000459	ceh-38	F22D3.1	HGNC:ONECUT1|ParaSite-Compara, HGNC:ONECUT2|ParaSite-Compara, ENSG00000205922|ParaSite-Compara	Is predicted to have DNA binding activity. Is expressed in several structures, including body wall musculature\; excretory cell\; intestine\; neurons\; and somatic nervous system.
WBGene00012716	Y39E4B.5	Y39E4B.5	HGNC:SLC2A14|ParaSite-Compara, HGNC:SLC2A10|ParaSite-Compara, HGNC:SLC2A8|ParaSite-Compara, HGNC:SLC2A7|ParaSite-Compara, HGNC:SLC2A11|ParaSite-Compara, HGNC:SLC2A1|ParaSite-Compara, HGNC:SLC2A6|ParaSite-Compara, HGNC:SLC2A12|ParaSite-Compara, HGNC:SLC2A9|ParaSite-Compara, HGNC:SLC2A2|ParaSite-Compara, HGNC:SLC2A3|ParaSite-Compara, ENSG00000251357|ParaSite-Compara, HGNC:SLC2A5|ParaSite-Compara	Is predicted to have transmembrane transporter activity. Human ortholog(s) of this gene are implicated in several diseases, including arterial tortuosity syndrome\; dystonia (multiple)\; and idiopathic generalized epilepsy 12.
WBGene00022062	Y67D8B.2	Y67D8B.2	HGNC:NR5A2|ParaSite-Compara, HGNC:NR5A1|ParaSite-Compara	Is enriched in neurons and somatic gonad precursor based on RNA-seq and microarray studies. Is affected by several genes including pgl-1\; alg-1\; and glh-1 based on tiling array and RNA-seq studies. Is affected by Rifampin\; allantoin\; and Sirolimus based on RNA-seq studies. Human ortholog(s) of this gene are implicated in 46 XY gonadal dysgenesis\; premature ovarian failure\; and spermatogenic…
WBGene00022278	rcor-1	Y74C9A.4	HGNC:RCOR1|EnsEMBL-Compara;Hieranoid;Roundup;Inparanoid;OrthoFinder;OrthoInspector;Panther;ParaSite-Compara, HGNC:RCOR2|EnsEMBL-Compara;OrthoInspector;Hieranoid;Panther;Roundup;TreeFam;Inparanoid;OrthoFinder;ParaSite-Compara, HGNC:ELMSAN1|ParaSite-Compara, HGNC:ZNF541|ParaSite-Compara, HGNC:RCOR3|ParaSite-Compara, HGNC:TRERF1|ParaSite-Compara	Is an ortholog of human RCOR2 (REST corepressor 2). Is predicted to have several functions, including DNA-binding transcription factor activity\; transcription corepressor activity\; and transcription factor binding activity.
WBGene00014197	ZK1053.2	ZK1053.2	N.A.	Is enriched in Z1.p\; Z4.a\; gon_male_dtc anterior\; gon_male_dtc posterior\; and in male based on RNA-seq studies. Is affected by several genes including daf-2\; dpy-10\; and eat-2 based on microarray\; RNA-seq\; and tiling array studies. Is affected by nineteen chemicals including hydrogen sulfide\; nicotinic acid\; and methylmercuric chloride based on microarray and RNA-seq studies.
WBGene00001162	efl-2	Y48C3A.17	HGNC:E2F1|Roundup;Panther;OrthoFinder;EnsEMBL-Compara;ParaSite-Compara, HGNC:E2F5|Panther;EnsEMBL-Compara;Roundup;ParaSite-Compara, HGNC:E2F2|Roundup;EnsEMBL-Compara;OrthoFinder, HGNC:E2F6|TreeFam;EnsEMBL-Compara;OrthoFinder;ParaSite-Compara	Is an ortholog of human E2F1 (E2F transcription factor 1). Is predicted to have DNA-binding transcription factor activity, RNA polymerase II-specific\; sequence-specific DNA binding activity\; and transcription factor binding activity. Is involved in negative regulation of vulval development. Is expressed in dorsal nerve cord\; head muscle\; intestine\; spermatheca\; and ventral nerve cord.
WBGene00003480	klf-3	F54H5.4	HGNC:KLF2|TreeFam;Panther;Roundup;ParaSite-Compara, HGNC:KLF1|TreeFam;Panther;Roundup, HGNC:KLF7|ParaSite-Compara, HGNC:KLF3|ParaSite-Compara, HGNC:KLF11|ParaSite-Compara, HGNC:KLF16|ParaSite-Compara, HGNC:KLF5|ParaSite-Compara, HGNC:KLF15|ParaSite-Compara, HGNC:KLF9|ParaSite-Compara, HGNC:KLF14|ParaSite-Compara, HGNC:KLF18|ParaSite-Compara, HGNC:KLF10|ParaSite-Compara, HGNC:SP6|ParaSite-Compara,…	Is an ortholog of human KLF2 (Kruppel like factor 2). Is predicted to have DNA-binding transcription factor activity, RNA polymerase II-specific. Is involved in fatty acid homeostasis. Is expressed in germ line and vulva. Is used to study obesity. Human ortholog(s) of this gene are implicated in several diseases, including chromosome 15q13.3 microdeletion syndrome\; maturity-onset diabetes of the…
WBGene00020368	ast-1	T08H4.3	HGNC:FEV|EnsEMBL-Compara;TreeFam;Panther;ParaSite-Compara, HGNC:ERG|Hieranoid;OrthoInspector;PhylomeDB;Panther;OrthoFinder;ParaSite-Compara, HGNC:FLI1|Hieranoid;OrthoInspector;PhylomeDB;Panther;OrthoFinder;ParaSite-Compara, HGNC:ETV5|ParaSite-Compara, HGNC:ETV3L|ParaSite-Compara, HGNC:ERF|ParaSite-Compara, HGNC:ETV2|ParaSite-Compara, HGNC:SPI1|ParaSite-Compara, HGNC:ELF2|ParaSite-Compara, HGNC:ET…	Is an ortholog of human ERG (ETS transcription factor ERG) and FLI1 (Fli-1 proto-oncogene, ETS transcription factor). Is predicted to have DNA-binding transcription factor activity, RNA polymerase II-specific. Is involved in neuron differentiation\; positive regulation of transcription by RNA polymerase II\; and regulation of nematode male tail tip morphogenesis. Localizes to nucleus. Is expresse…
WBGene00021538	rabs-5	Y42H9AR.3	HGNC:RBSN|OrthoInspector;EnsEMBL-Compara;PhylomeDB;Hieranoid;Panther;Roundup;TreeFam;Inparanoid;OrthoFinder;OMA;ParaSite-Compara	Is an ortholog of human RBSN (rabenosyn, RAB effector). Is predicted to have phosphatidylinositol-3-phosphate binding activity. Is involved in pinocytosis and receptor-mediated endocytosis. Is expressed in PQR\; amphid neurons\; phasmid neurons\; and ray neurons.
WBGene00013111	sta-1	Y51H4A.17	HGNC:STAT6|OrthoInspector;PhylomeDB;Panther;TreeFam;Inparanoid;EnsEMBL-Compara;OrthoFinder, HGNC:STAT3|EnsEMBL-Compara;OrthoInspector;PhylomeDB;Panther;Inparanoid;ParaSite-Compara, HGNC:STAT5A|OrthoInspector;PhylomeDB;Hieranoid;Panther;Roundup;TreeFam;Inparanoid;OMA;EnsEMBL-Compara;OrthoFinder, HGNC:STAT2|EnsEMBL-Compara;Panther;PhylomeDB;ParaSite-Compara, HGNC:STAT5B|OrthoInspector;PhylomeDB;Hie…	Is an ortholog of human STAT5A (signal transducer and activator of transcription 5A) and STAT5B (signal transducer and activator of transcription 5B). Exhibits sequence-specific DNA binding activity. Is involved in dauer larval development and positive regulation of transcription by RNA polymerase II. Localizes to cytoplasm and nucleus. Is expressed in coelomocyte\; head\; somatic nervous system\…
WBGene00001324	eor-1	R11E3.6	HGNC:ZBTB17|Hieranoid;OMA;PhylomeDB, HGNC:ZBTB24|Inparanoid;PhylomeDB, HGNC:MYNN|Inparanoid;PhylomeDB, HGNC:ZNF358|EnsEMBL-Compara;PhylomeDB;ParaSite-Compara, HGNC:ZNF579|ParaSite-Compara, HGNC:PRDM5|ParaSite-Compara, HGNC:ZNF668|ParaSite-Compara	Is an ortholog of human ZBTB17 (zinc finger and BTB domain containing 17) and ZNF358 (zinc finger protein 358). Is predicted to have DNA binding activity and DNA-binding transcription factor activity. Is involved in several processes, including determination of adult lifespan\; nematode male tail tip morphogenesis\; and positive regulation of proteasomal ubiquitin-dependent protein catabolic proc…
WBGene00000460	ceh-39	T26C11.7	HGNC:ONECUT1|ParaSite-Compara, HGNC:ONECUT2|ParaSite-Compara, ENSG00000205922|ParaSite-Compara	Is predicted to have DNA binding activity. Is involved in negative regulation of transcription by RNA polymerase II and primary sex determination. Localizes to condensed nuclear chromosome and germ cell nucleus. Is expressed in body wall musculature\; germ line\; gonad\; neurons\; and ventral nerve cord.

## Sheet: RNAiclonesSequenced
RNAi clones sequenced
atf-6	F45E6.2	WBGene00000222
TGGGTACCGGGCCCCCCCTCGAGGTCGACGGTATCGATAAGCTTGATTGATTTCTTTTGAACCGCCAATGTCTGTGGTCCATAAACTGAGGCTGGTTTTACTTTCTGTGCGTAGTTGAACTTTCGCATTGCTTCCTTATTTAATAGTCCTCCCGAAAACTTCATTGGAACATTATCAAATGAATGTACTTGTACCCAGCGCTCAATGTCGTTGTTTACTCTGAAAAGAGTAGTCAGTTATAAAAATTGTTCATTTTCAAGTCCCTCACCTTATTGTCTCTGTGGCGTTTAGTTTGTACATATCACAATCATTTTGAGTGGAGTTCGGATAGTTGTGGATTGGTTGTTGAGTAGGCTAAACTTTTATAAGAGATTTTTAAATATTAAGCTCGTACACATA…
drl-1	F18F11.5	WBGene00017578
GCGTATACGACTCACTATAGGGCGAATTGGGTACCGGGCCCCCCCTCGAGGTCGACGGTATCGATAAGCTTGATTGGACTTCCGCAGGTTTATCATGATCTGGACTTCCTTCCACAAGTATATATCCTCCAACAATTACATCCTTTTCGGGAGTTTTCATAACAAATCGGCTTCTAAAAATTAATATTCTCTGTGGGAATTTCATTGTAACAAACTTTTCCACTTTTCCACTTTCCACATCAGCGTGATATCTGTCCAGAGAATTATTACAGCAAAGTGTAGTTAGCAAAATGATAATTGGTAGCAGAATCAAGGCAATTAAAACAACGAATCCTAAGGTTAAATATGGAATTTCATATACCTTCATTTCTTACCTTCATTCAATGAGCACTGGCACGC…
elt-2	C33D3.1	WBGene00001250
CGCGTATACGACTCACTATAGGGCGAATTGGGTACCGGGCCCCCCCTCGAGGTCGACGGTATCGATAAGCTTGATTACCCCCGATTCTGGAAATACCTTCAGAGCAGCCAACTGCTAAAATTGCCAAGCAATCCTCTAAAAAGTCAAGTAGCTCAAATAGGGGGTCAAACGTAAGTTAAAGTTCGTTTGCAACAGTGTACAACAAATCAATACAGGGATCTGCGTCCCGTCGGCAGGGACTTGTGTGCTCCAATTGCAATGGTACCAACACAACTCTCTGGAGAAGAAATGCTGAAGGAGATCCGGTCTGCAAGTGAGTTTTTTTTTTTTTTTTTTTTTCTAATGGTTTGTTTTTCAGKGCTTGCGGGCTTTACTTCAAACTCCATCACATCCCTCGGC…
gfp
ATACGACTCACTATAGGGCGAATTGGGTACCGGTAGAAAAAATGAGTAAAGGAGAAGAACTTTTCACTGGAGTTGTCCCAATTCTTGTTGAATTAGATGGTGATGTTAATGGGCACAAATTTTCTGTCAGTGGAGAGGGTGAAGGTGATGCAACATACGGAAAACTTACCCTTAAATTTATTTGCACTACTGGAAAACTACCTGTTCCATGGCCAACACTTGTCACTACTTTCTCTTATGGTGTTCAATGCTTTTCAAGATACCCAGATCATATGAAACGGCATGACTTTTTCAAGAGTGCCATGCCCGAAGGTTATGTACAGGAAAGAACTATATTTTTCAAAGATGACGGGAACTACAAGACACGTGCTGAAGTCAAGTTTGAAGGTGATACCCTTG…
gsk-3	Y18D10A.5	WBGene00001746
GCGCGTATACGACTCACTATAGGGCGAATTGGGTACCGGGCCCCCCCTCGAGGTCGACGGTATCGATAAGCTTGATTAGCAATTTAGTGTTGGGAAAACATTTTTAATTCATTTTTCGGCCTTTTTTCTACAAAAACCCCCAAAAAACTCACCGCTTGAGGTGTTGGCCGAGACGTCGGCGTATACTCGATAATCTTCGAAATGAGATCAATCGCTTCAGCAGGCGTGTGTACACGGAATACCTTATTCCATGGATGTGCCTTTATCTGTGGAAATTTGAATTCCTTGTAGTTCGGATTCATACTTTGAATTTGTTCACGAGTCGGTGTTCCAAGAACTTTAATAATTTCAACGAGTTGATCAACTCCAGAGTCACCAGGGAAAATTGGTTGGCCGAGA…
gtf-2F2	Y39B6A.36	WBGene00012694
ATACGACTCRCTATAGGGCGAATTGGGTACCGGGCCCCCCCTCGAGGTCGACGGTATCGATAAGCTTGATTCCATCATATTACAATGCCCACTTTCACCGCTGCTTGCCCACTGAATACACTTTTTTTTACTTGGAAATCGTTTTGGCATCTGCAAAAAATATTTATTTATCAGTTTTATTAAGAAAAAACGAAAAAAATCGATGAAAAACGAAAGAAAACAGGCGGAAAACAAAGCAAGATAAATGGCCGCTGAAATTTGTCTTCCCCTCGGCCATGGCCTAGAAACCACTTTTCCTCGTCCCTCGTGAGGAAAAAGTTGCAGTGAAAAAGGCCAAAACAACACAAATTTTCCGTAGTTTTCTCGAGTATTTTACCTATAAAAACTATGCTTCTCAAA…
ire-1	C41C4.4	WBGene00002147
NNNCGCGCGTAATACGACTCACTATAGGGCGAATTGGGTACCGGGCCCCCCCTCGAGGTCGACGGTATCGATAAGCTTGATTGAAGACGCAACAGTTGGACACAGCTGAGGTGGTGGTTGATGACGCCCCGAGGAGGCTCGTTGAGCTTCTGATTTCTCTCTTCCCTCTTTTTATTTTTTTTGTAAATGTTTGTAGGTTAAAAGGGATGACAAAAGATTGACATTTAGTGTGGGAAATATCATAATATCGCAAAGAATTTGTCACTGATCAGAAATACATTCATCTATGCTCTTTTTTCTCAGAATATCTTCACCGTGGATCAATGGCCAACAGTTTTGGGTGTCAATGCTGCAGATCCTCAAACAACATCCCTCACGAATCAATTCTTCCCAGCTTTA…
let-607	F57B10.1	WBGene00002783
TANACGACTCACTATAGGGCGAATTGGGTACCGGGCCCCCCCTCGAGGTCGACGGTATCGATAAGCTTGATTGGACCAGCAGTAGACCAGGAGTTTGGAAGACGAATTGTTGATTCTTCTTCCATTTTGATATAGTCGTTCAACTGCAACTAAAGGAAATTTAAATTCTGATGAAGAATTGTGTTTTTCTTTTGACATTTAACTGATAGTTGAAATAATTAACGATAAAACATTAACCAACTTTTTAAAATTAAATACTCACCACTTCATATTTAATTGGTCTATCCATCGTTACATATTGCACCTTTTGTTGTGGCACCTTGTAATATTGTGCCTGCTCTACATTCACAGAAGAAGCTGGAACAGCTCTATAAGTGACTCTTGGCTGTCCATTCATCG…
ntl-4	C49H3.5	WBGene00003827
GTAATACGACTCACTATAGGGCGAATTGGGTACCGGGCCCCCCCTCGAGGTCGACGGTATCGATAAGCTTGATTACAGTTGATGACGTTGAGCGAACAGGTTTAGTCTAAAATCTTTTAACTTAAAATAAATAATTTGAATATTCTGCAGGCTCAGCGATACACATGTGTGCGGATGATCCTGATGATGATGATGCAGATTCTACGAACACAAGCAATGTAATAGCATTTTTTTTTTAAAGCTTAGCTTCAAAGTTTTTATTTTCAGTCTATCGACGACCCGGCACCTTCAAATCCAGCAGATGAGACAGTTAACAGTAGACGGAGTAATCAGACAGCCAGAGAGCGACAGTGGTCAGAACGCGACGAAATTTCAGTGGCGCCCAGCAATACACCTCCT…
rpl-14	C04F12.4	WBGene00004426
NNNGCGCGCGTAATACGACTCACTATAGGGCGAATTGGGTACCGGGCCCCCCCTCGAGGTCGACGGTATCGATAAGCTTGATTCGGTGTTTCTTCACTTCTCAATGTACGCGTTATAATTTTGATTTATTATTTAATTTTCAGTAAACATGGTCTTCAACCGTGTCGTTCAAATTGGGCGCGTCGTCTTCATCGCCTCCGGCAAAGACCAAGGCAAGCTTGCTGCCATCGTCAACGTTATCGACGGAAACAGAGTAAGTCATTTATTAATTAAGAAAAAAAAATGTATAGCAGATTTATTGAATTTTACTTAAACTTTTTAAAACGTTTAGATTATCAATGCGATCAGAAATGTTTGTAAAATGCAAAAATCGGAAAGCATAGCTCTGAATCATTAAAT…
skn-1	T19E7.2	WBGene00004804
NGGGCGATTGGGTACCGGGCCCCCCCTCGAGGTCGACGGTATCGATAAGCTTTTTCAATGGCCAATCCAAATATGATTATCCACAATTCAACCGTCCAATGGGTCTCCGTTGGCGTGATGATCAACGGATGATGGAGTATTTCATGTCGAATGGTCCAGTAGAAACTGTTCCAGTTATGCCAATACTCACCGAGCATCCACCAGCATCTCCATTCGGTAGAGGACCATCTACAGAACGTCCAACCACATCATCTCGATACGAGTACAGTTCGCCTTCTCTCGAGGATATCGACTTGATTGATGTGCTATGGAGAAGTGATATTGCTGGAGAGAAGGGCACACGACAAGTGGCTCCTGCTGATCAGTACGAATGTGATTTGCAGACGTTGACAGAGAAAT…
xbp-1	R74.3	WBGene00006959
CGCGTATACGACTCACTATAGGGCGAATTGGGTACCGGGCCCCCCCTCGAGGTCGACGGTATCGATAAGCTTGATATCACAAGTTTGTACAAAAAAGCAGGCTTGGCTCCCAAGCGTGCACTTCCAACAGAACAAGTTGTCGCACAACTTCTTGGCGATGATATGGGACCATCTGGGCCACGCAAAAGAGAACGACTGAATCATTTGAGTCAGGAGGAGAAAATGGATCGTCGGAAACTTAAAAATCGAGTCGCAGCCCAAAATGCTAGAGACAAAAAGAAGGAAAGATCAGCAAAGATCGAGGATGTGATGCGCGATCTGGTGGAGGAGAACCGCCGGCTCCGCGCTGAAAACGAACGTCTTCGCCGTCAAAATAAAAATCTTATGAACCAGCAGAAC…
ztf-1	F54F2.5	WBGene00018833
TACGACTCACTATAGGGCGAATTGGGTACCGGGCCCCCCCTCGAGGTCGACGGTATCGATAAGCTTGATTGAAGAGNATCGNTGTGGTGAAACGTCTGAAAAAAAGGATGAAAAGATTGGAGAGAGAGAGCTTCAATGACGATTGAACCAATTNAGACNAAAGCCAATTTTGAGGATGAGGCTTTTCANTTTANAAGAAAAAAAAAGAGAAACACGGGCGGACGAAAAGCGCAAACAAAGCTTATTTTGTACCCTTTTGCACNTGTTTCTCATGAATTTCTTCGATACNAATATNTAANTTTTTTAAANAAATTTTTTGTTAAACAGATCGAAGGAGTACAGTAATCTTGAAATTTTGCTTCNAGTGATAGAAAAAACNTATTCAATTTTTCCGAATTT…

## Sheet: Auxin on Patf-4gfp
Scored GFP fluorescence of L4 animals that were on the compounds from egg to L4 stage
	Number of animals							Percentage
Strain/condition	none	low	medium	high		total	Strain/condition	none	low	medium	high	total
Patf-4(uORF)::GFP DMSO	79	5	0	0		84	Patf-4(uORF)::GFP DMSO	94.0476	5.95238	0	0	100
Patf-4(uORF)::GFP 1 mM auxin	89	3	0	0		92	Patf-4(uORF)::GFP 1 mM auxin	96.7391	3.26087	0	0	100
Patf-4(uORF)::GFP 2 mM auxin	76	3	0	0		79	Patf-4(uORF)::GFP 2 mM auxin	96.2025	3.79747	0	0	100
Patf-4(uORF)::GFP 10 mM auxin	95	9	0	0		104	Patf-4(uORF)::GFP 10 mM auxin	91.3462	8.65385	0	0	100

## Sheet: Candidates on Patf-4gfp
Scored GFP fluorescence of L4 animals that were on the RNAi from egg to L4 stage
	Number of animals							Percentage
Strain/condition	none	low	medium	high		total	Strain/condition	none	low	medium	high	total
Patf-4(uORF)::GFP L4440	63	5	0	0		68	Patf-4(uORF)::GFP L4440	92.6471	7.35294	0	0	100
Patf-4(uORF)::GFP L4440	75	4	0	0		79	Patf-4(uORF)::GFP L4440	94.9367	5.06329	0	0	100
Patf-4(uORF)::GFP RNAi GFP	67	0	0	0		67	Patf-4(uORF)::GFP RNAi GFP	100	0	0	0	100
Patf-4(uORF)::GFP RNAi GFP	72	0	0	0		72	Patf-4(uORF)::GFP RNAi GFP	100	0	0	0	100
Patf-4(uORF)::GFP sams-1(RNAi)	1	8	23	95		127	Patf-4(uORF)::GFP sams-1(RNAi)	0.787402	6.29921	18.1102	74.8031	100
Patf-4(uORF)::GFP fat-6/7(RNAi)	0	8	18	54		80	Patf-4(uORF)::GFP fat-6/7(RNAi)	0	10	22.5	67.5	100
Patf-4(uORF)::GFP skn-1(RNAi)	59	6	0	0		65	Patf-4(uORF)::GFP skn-1(RNAi)	90.7692	9.23077	0	0	100
Patf-4(uORF)::GFP gsk-3(RNAi)	91	7	1	0		99	Patf-4(uORF)::GFP gsk-3(RNAi)	91.9192	7.07071	1.0101	0	100
Patf-4(uORF)::GFP ntl-4(RNAi)	82	0	0	0		82	Patf-4(uORF)::GFP ntl-4(RNAi)	100	0	0	0	100
Patf-4(uORF)::GFP drl-1(RNAi)	112	10	1	0		123	Patf-4(uORF)::GFP drl-1(RNAi)	91.0569	8.13008	0.813008	0	100
Patf-4(uORF)::GFP elt-2(RNAi)	128	2	0	0		130	Patf-4(uORF)::GFP elt-2(RNAi)	98.4615	1.53846	0	0	100
Patf-4(uORF)::GFP ire-1(RNAi)	66	16	27	11		120	Patf-4(uORF)::GFP ire-1(RNAi)	55	13.3333	22.5	9.16667	100
Patf-4(uORF)::GFP rpl-14(RNAi)	122	4	0	0		126	Patf-4(uORF)::GFP rpl-14(RNAi)	96.8254	3.1746	0	0	100
Patf-4(uORF)::GFP let-607(RNAi)	7	9	48	60		124	Patf-4(uORF)::GFP let-607(RNAi)	5.64516	7.25806	38.7097	48.3871	100
Patf-4(uORF)::GFP gtf-2F2(RNAi)	83	4	1	0		88	Patf-4(uORF)::GFP gtf-2F2(RNAi)	94.3182	4.54545	1.13636	0	100

## Sheet: MDT15degronPatf4gfp_ire1_let607
Contincency tables
Scored GFP fluorescence of day-2 animals that were on the RNAi from egg to L4 stage, then 1 mM auxin top coated, then scored 48 hours later
	Number of animals							Percentage
Strain/condition	none	low	medium	high		total	Strain/condition	none	low	medium	high	total
MDT-15degron; Patf-4(uORF)::GFP L4440 + 1 mM auxin	0	6	36	106		148	MDT-15degron; Patf-4(uORF)::GFP L4440 + 1 mM auxin	0	4.05405	24.3243	71.6216	100
MDT-15degron; Patf-4(uORF)::GFP RNAi gfp + 1 mM auxin	143	0	0	0		143	MDT-15degron; Patf-4(uORF)::GFP RNAi gfp + 1 mM auxin	100	0	0	0	100
MDT-15degron; Patf-4(uORF)::GFP ire-1(RNAi) + 1 mM auxin	112	11	16	9		148	MDT-15degron; Patf-4(uORF)::GFP ire-1(RNAi) + 1 mM auxin	75.6757	7.43243	10.8108	6.08108	100
MDT-15degron; Patf-4(uORF)::GFP let-607(RNAi) + 1 mM auxin	27	88	45	7		167	MDT-15degron; Patf-4(uORF)::GFP let-607(RNAi) + 1 mM auxin	16.1677	52.6946	26.9461	4.19162	100

## Sheet: DoubleRNAi_fat-6-7_Trial1
Contincency tables
Scored GFP fluorescence of L4 animals that were on the RNAi from egg to L4 stage
	Number of animals							Percentage
Strain/condition	none	low	medium	high		total	Strain/condition	none	low	medium	high	total
Patf-4(uORF)::GFP L4440/L4440	100	8	0	0		108	Patf-4(uORF)::GFP L4440/L4440	92.5926	7.40741	0	0	100
Patf-4(uORF)::GFP L4440/GFP(RNAi)	106	0	0	0		106	Patf-4(uORF)::GFP L4440/GFP(RNAi)	100	0	0	0	100
Patf-4(uORF)::GFP L4440/sams-1(RNAi)	0	7	31	91		129	Patf-4(uORF)::GFP L4440/sams-1(RNAi)	0	5.42636	24.031	70.5426	100
Patf-4(uORF)::GFP L4440/fat-6/7(RNAi)	4	18	59	66		147	Patf-4(uORF)::GFP L4440/fat-6/7(RNAi)	2.72109	12.2449	40.1361	44.898	100
Patf-4(uORF)::GFP fat-6/7(RNAi)/skn-1(RNAi)	73	29	9	3		114	Patf-4(uORF)::GFP fat-6/7(RNAi)/skn-1(RNAi)	64.0351	25.4386	7.89474	2.63158	100
Patf-4(uORF)::GFP fat-6/7(RNAi)/elt-2(RNAi)	20	20	71	37		148	Patf-4(uORF)::GFP fat-6/7(RNAi)/elt-2(RNAi)	13.5135	13.5135	47.973	25	100
Patf-4(uORF)::GFP fat-6/7(RNAi)/let-607(RNAi)	16	29	62	6		113	Patf-4(uORF)::GFP fat-6/7(RNAi)/let-607(RNAi)	14.1593	25.6637	54.8673	5.30973	100
Patf-4(uORF)::GFP fat-6/7(RNAi)/gsk-3(RNAi)	105	9	14	12		140	Patf-4(uORF)::GFP fat-6/7(RNAi)/gsk-3(RNAi)	75	6.42857	10	8.57143	100
Patf-4(uORF)::GFP fat-6/7(RNAi)/rpl-14(RNAi)	109	8	11	6		134	Patf-4(uORF)::GFP fat-6/7(RNAi)/rpl-14(RNAi)	81.3433	5.97015	8.20896	4.47761	100
Patf-4(uORF)::GFP fat-6/7(RNAi)/gtf-2F2(RNAi)	111	7	2	1		121	Patf-4(uORF)::GFP fat-6/7(RNAi)/gtf-2F2(RNAi)	91.7355	5.78512	1.65289	0.826446	100
Patf-4(uORF)::GFP fat-6/7(RNAi)/ire-1(RNAi)	106	37	40	29		212	Patf-4(uORF)::GFP fat-6/7(RNAi)/ire-1(RNAi)	50	17.4528	18.8679	13.6792	100
Patf-4(uORF)::GFP fat-6/7(RNAi)/drl-1(RNAi)	102	14	4	1		121	Patf-4(uORF)::GFP fat-6/7(RNAi)/drl-1(RNAi)	84.2975	11.5702	3.30579	0.826446	100
Patf-4(uORF)::GFP fat-6/7(RNAi)/ntl-4(RNAi)	116	5	1	0		122	Patf-4(uORF)::GFP fat-6/7(RNAi)/ntl-4(RNAi)	95.082	4.09836	0.819672	0	100

## Sheet: DoubleRNAi_fat-6-7_Trial2
Contincency tables
Scored GFP fluorescence of L4 animals that were on the RNAi from egg to L4 stage
	Number of animals							Percentage
Strain/condition	none	low	medium	high		total	Strain/condition	none	low	medium	high	total
Patf-4(uORF)::GFP L4440/L4440	77	3	0	0		80	Patf-4(uORF)::GFP L4440/L4440	96.25	3.75	0	0	100
Patf-4(uORF)::GFP L4440/GFP(RNAi)	89	0	0	0		89	Patf-4(uORF)::GFP L4440/GFP(RNAi)	100	0	0	0	100
Patf-4(uORF)::GFP L4440/sams-1(RNAi)	2	6	40	64		112	Patf-4(uORF)::GFP L4440/sams-1(RNAi)	1.78571	5.35714	35.7143	57.1429	100
Patf-4(uORF)::GFP L4440/fat-6/7(RNAi)	8	12	48	57		125	Patf-4(uORF)::GFP L4440/fat-6/7(RNAi)	6.4	9.6	38.4	45.6	100
Patf-4(uORF)::GFP fat-6/7(RNAi)/skn-1(RNAi)	58	12	1	0		71	Patf-4(uORF)::GFP fat-6/7(RNAi)/skn-1(RNAi)	81.6901	16.9014	1.40845	0	100
Patf-4(uORF)::GFP fat-6/7(RNAi)/elt-2(RNAi)	11	11	34	60		116	Patf-4(uORF)::GFP fat-6/7(RNAi)/elt-2(RNAi)	9.48276	9.48276	29.3103	51.7241	100
Patf-4(uORF)::GFP fat-6/7(RNAi)/gsk-3(RNAi)	57	20	37	23		137	Patf-4(uORF)::GFP fat-6/7(RNAi)/gsk-3(RNAi)	41.6058	14.5985	27.0073	16.7883	100
Patf-4(uORF)::GFP fat-6/7(RNAi)/let-607(RNAi)	33	73	40	7		153	Patf-4(uORF)::GFP fat-6/7(RNAi)/let-607(RNAi)	21.5686	47.7124	26.1438	4.57516	100
Patf-4(uORF)::GFP fat-6/7(RNAi)/ntl-4(RNAi)	95	3	0	0		98	Patf-4(uORF)::GFP fat-6/7(RNAi)/ntl-4(RNAi)	96.9388	3.06122	0	0	100
Patf-4(uORF)::GFP fat-6/7(RNAi)/gtf-2F2(RNAi)	83	5	0	0		88	Patf-4(uORF)::GFP fat-6/7(RNAi)/gtf-2F2(RNAi)	94.3182	5.68182	0	0	100
Patf-4(uORF)::GFP fat-6/7(RNAi)/drl-1(RNAi)	44	16	13	5		78	Patf-4(uORF)::GFP fat-6/7(RNAi)/drl-1(RNAi)	56.4103	20.5128	16.6667	6.41026	100
Patf-4(uORF)::GFP fat-6/7(RNAi)/ire-1(RNAi)	30	22	32	18		102	Patf-4(uORF)::GFP fat-6/7(RNAi)/ire-1(RNAi)	29.4118	21.5686	31.3725	17.6471	100
Patf-4(uORF)::GFP fat-6/7(RNAi)/rpl-14(RNAi)	60	17	14	7		98	Patf-4(uORF)::GFP fat-6/7(RNAi)/rpl-14(RNAi)	61.2245	17.3469	14.2857	7.14286	100

## Sheet: DoubleRNAi_fat-6-7_Trial3
Contincency tables
Scored GFP fluorescence of L4 animals that were on the RNAi from egg to L4 stage
	Number of animals							Percentage
Strain/condition	none	low	medium	high		total	Strain/condition	none	low	medium	high	total
Patf-4(uORF)::GFP L4440/L4440	71	74	1	0		146	Patf-4(uORF)::GFP L4440/L4440	48.6301	50.6849	0.684932	0	100
Patf-4(uORF)::GFP L4440/GFP(RNAi)	120	0	0	0		120	Patf-4(uORF)::GFP L4440/GFP(RNAi)	100	0	0	0	100
Patf-4(uORF)::GFP L4440/fat-6/7(RNAi)	0	4	37	120		161	Patf-4(uORF)::GFP L4440/fat-6/7(RNAi)	0	2.48447	22.9814	74.5342	100
Patf-4(uORF)::GFP fat-6/7(RNAi)/skn-1(RNAi)	119	40	0	0		159	Patf-4(uORF)::GFP fat-6/7(RNAi)/skn-1(RNAi)	74.8428	25.1572	0	0	100
Patf-4(uORF)::GFP fat-6/7(RNAi)/elt-2(RNAi)	31	59	53	37		180	Patf-4(uORF)::GFP fat-6/7(RNAi)/elt-2(RNAi)	17.2222	32.7778	29.4444	20.5556	100
Patf-4(uORF)::GFP fat-6/7(RNAi)/gsk-3(RNAi)	108	95	66	5		274	Patf-4(uORF)::GFP fat-6/7(RNAi)/gsk-3(RNAi)	39.4161	34.6715	24.0876	1.82482	100
Patf-4(uORF)::GFP fat-6/7(RNAi)/ire-1(RNAi)	28	46	46	23		143	Patf-4(uORF)::GFP fat-6/7(RNAi)/ire-1(RNAi)	19.5804	32.1678	32.1678	16.0839	100
Patf-4(uORF)::GFP fat-6/7(RNAi)/ntl-4(RNAi)	99	14	0	0		113	Patf-4(uORF)::GFP fat-6/7(RNAi)/ntl-4(RNAi)	87.6106	12.3894	0	0	100
Patf-4(uORF)::GFP fat-6/7(RNAi)/gtf-2F2(RNAi)	92	48	1	0		141	Patf-4(uORF)::GFP fat-6/7(RNAi)/gtf-2F2(RNAi)	65.2482	34.0426	0.70922	0	100
Patf-4(uORF)::GFP fat-6/7(RNAi)/drl-1(RNAi)	98	91	0	0		189	Patf-4(uORF)::GFP fat-6/7(RNAi)/drl-1(RNAi)	51.8519	48.1481	0	0	100
Patf-4(uORF)::GFP fat-6/7(RNAi)/rpl-14(RNAi)	94	97	15	0		206	Patf-4(uORF)::GFP fat-6/7(RNAi)/rpl-14(RNAi)	45.6311	47.0874	7.28155	0	100
Patf-4(uORF)::GFP fat-6/7(RNAi)/let-607(RNAi)	0	53	59	0		112	Patf-4(uORF)::GFP fat-6/7(RNAi)/let-607(RNAi)	0	47.3214	52.6786	0	100

## Sheet: DoubleRNAi_sams-1
Contincency tables
Scored GFP fluorescence of L4 animals that were on the RNAi from egg to L4 stage
	Number of animals							Percentage
Strain/condition	none	low	medium	high		total	Strain/condition	none	low	medium	high	total
Patf-4(uORF)::GFP L4440/L4440	68	3	0	0		71	Patf-4(uORF)::GFP L4440/L4440	95.7746	4.22535	0	0	100
Patf-4(uORF)::GFP L4440/L4440	93	1	0	0		94	Patf-4(uORF)::GFP L4440/L4440	98.9362	1.06383	0	0	100
Patf-4(uORF)::GFP L4440/GFP(RNAi)	67	0	0	0		67	Patf-4(uORF)::GFP L4440/GFP(RNAi)	100	0	0	0	100
Patf-4(uORF)::GFP L4440/GFP(RNAi)	129	0	0	0		129	Patf-4(uORF)::GFP L4440/GFP(RNAi)	100	0	0	0	100
Patf-4(uORF)::GFP L4440/sams-1(RNAi)	17	14	28	38		97	Patf-4(uORF)::GFP L4440/sams-1(RNAi)	17.5258	14.433	28.866	39.1753	100
Patf-4(uORF)::GFP L4440/sams-1(RNAi)	19	46	41	48		154	Patf-4(uORF)::GFP L4440/sams-1(RNAi)	12.3377	29.8701	26.6234	31.1688	100
Patf-4(uORF)::GFP sams-1(RNAi)/fat-6/7(RNAi)	9	28	28	35		100	Patf-4(uORF)::GFP sams-1(RNAi)/fat-6/7(RNAi)	9	28	28	35	100
Patf-4(uORF)::GFP sams-1(RNAi)/elt-2(RNAi)	70	12	3	1		86	Patf-4(uORF)::GFP sams-1(RNAi)/elt-2(RNAi)	81.3953	13.9535	3.48837	1.16279	100
Patf-4(uORF)::GFP sams-1(RNAi)/gsk-3(RNAi)	72	6	3	0		81	Patf-4(uORF)::GFP sams-1(RNAi)/gsk-3(RNAi)	88.8889	7.40741	3.7037	0	100
Patf-4(uORF)::GFP sams-1(RNAi)/drl-1(RNAi)	73	1	0	0		74	Patf-4(uORF)::GFP sams-1(RNAi)/drl-1(RNAi)	98.6486	1.35135	0	0	100
Patf-4(uORF)::GFP sams-1(RNAi)/skn-1(RNAi)	71	0	0	0		71	Patf-4(uORF)::GFP sams-1(RNAi)/skn-1(RNAi)	100	0	0	0	100
Patf-4(uORF)::GFP sams-1(RNAi)/ire-1(RNAi)	72	25	30	12		139	Patf-4(uORF)::GFP sams-1(RNAi)/ire-1(RNAi)	51.7986	17.9856	21.5827	8.63309	100
Patf-4(uORF)::GFP sams-1(RNAi)/rpl-14(RNAi)	73	32	8	3		116	Patf-4(uORF)::GFP sams-1(RNAi)/rpl-14(RNAi)	62.931	27.5862	6.89655	2.58621	100
Patf-4(uORF)::GFP sams-1(RNAi)/let-607(RNAi)	17	93	32	6		148	Patf-4(uORF)::GFP sams-1(RNAi)/let-607(RNAi)	11.4865	62.8378	21.6216	4.05405	100
Patf-4(uORF)::GFP sams-1(RNAi)/gtf-2F2(RNAi)	83	1	0	0		84	Patf-4(uORF)::GFP sams-1(RNAi)/gtf-2F2(RNAi)	98.8095	1.19048	0	0	100
Patf-4(uORF)::GFP sams-1(RNAi)/ntl-4(RNAi)	92	1	0	0		93	Patf-4(uORF)::GFP sams-1(RNAi)/ntl-4(RNAi)	98.9247	1.07527	0	0	100
